# Supplementary material
Source: publisher figshare collection journal article supplement (https://acs.figshare.com/ndownloader/files/4970497)
Supplement: Supplementary file 1 [file 4970497]

# Asymmetric [3+2] Cycloaddition of Vinyl Cyclopropanes and $\alpha,\beta$ -Unsaturated Aldehydes by Synergistic Palladium and Organocatalysis

Kim Sørensen, Line Næsborg, Fernando Tur and Karl Anker Jørgensen\*

Department of Chemistry, Aarhus University

DK-8000 Aarhus C, Denmark

Fax (45) 8715 5956, e-mail: [kaj@chem.au.dk](mailto:kaj@chem.au.dk)

## SUPPORTING INFORMATION

### Contents

|                                                                         |     |
|-------------------------------------------------------------------------|-----|
| 1. General methods                                                      | S2  |
| 2. Synthesis of starting materials                                      | S3  |
| 3. General procedure for the asymmetric [3+2] cycloaddition             | S4  |
| 4. Synthetic transformations                                            | S10 |
| 5. Determination of the absolute and relative configuration in products | S12 |
| 6. NMR spectra                                                          | S17 |
| 7. UPC <sup>2</sup> traces                                              | S39 |

## 1. General methods

NMR spectra were acquired on a Bruker AVANCE III HD spectrometer running at 400 MHz for  $^1\text{H}$ , 100 MHz for  $^{13}\text{C}$  and 376 MHz for  $^{19}\text{F}$ . Chemical shifts ( $\delta$ ) are reported in ppm relative to residual solvent signals ( $\text{CHCl}_3$ , 7.26 ppm for  $^1\text{H}$  NMR,  $\text{CDCl}_3$ , 77.16 ppm for  $^{13}\text{C}$  NMR). For  $^{19}\text{F}$  NMR  $\text{CFCl}_3$  was used as internal standard. The following abbreviations are used to indicate the multiplicity in NMR spectra: s, singlet; d, doublet; t, triplet; q, quartet; m, multiplet; bs, broad signal.  $^{13}\text{C}$  NMR spectra were acquired in broad band decoupled mode.  $^{19}\text{F}$  NMR spectrum was acquired in proton decoupled mode. Mass spectra were recorded on a Bruker Maxis Impact mass spectrometer using electrospray ( $\text{ES}^+$ ) ionization (referenced to the mass of the charged species). Dry solvents were obtained from a MBraun MB SPS-800 solvent purification system. Analytical thin layer chromatography (TLC) was performed using pre-coated aluminum-backed plates (Merck Kieselgel 60 F254) and visualized by UV radiation or  $\text{KMnO}_4$  stain. For flash chromatography (FC) silica gel (Silica gel 60, 230-400 mesh, Sigma-Aldrich) was used. Optical rotations were measured on a Bellingham+Stanley ADP440+ polarimeter,  $\alpha$  values are given in  $\text{deg}\cdot\text{cm}^3\cdot\text{g}^{-1}\cdot\text{dm}^{-1}$ ; concentration  $c$  in  $\text{g}\cdot(100\text{ mL})^{-1}$ . The diastereomeric ratio (dr) of products was evaluated by  $^1\text{H}$  NMR analysis of the crude mixture. The enantiomeric excess (ee) of products was determined by chiral stationary phase Waters ACQUITY UPC<sup>2</sup> (Daicel Chiralpak). Reference samples for UPC<sup>2</sup> analysis were prepared using a mixture of products obtained from reactions with cat **3** and *ent*-cat **3**. Unless otherwise noted, analytical grade solvents and commercially available reagents were used without further purification.

## 2. Synthesis of starting materials

Vinyl cyclopropanes **1** were synthesized according to previously reported methods. Characterization data for **1a,b** matched those reported in the literature.<sup>1</sup> Characterization data for **1c** is provided below. Vinyl cyclopropanes **1b,c** were achieved and applied in the reaction as a diastereomeric mixture.  $\alpha,\beta$ -Unsaturated aldehydes **2** were either purchased from commercial sources or made by previously reported methods. Characterization data matched those reported in the literature.<sup>2</sup> All other reagents were purchased from commercial sources.

### Benzyl 1-cyano-2-vinylcyclopropane-1-carboxylate, **1c**

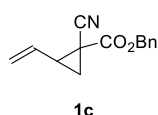

Isolated in 38% yield (0.86 g) as a colorless oil by FC on silica using EtOAc/pentane 1:8 as eluent (3:1 diastereomeric mixture after purification). For NMR characterization \* denotes the minor diastereoisomer, + denotes overlap of signals of both diastereoisomers, whereas no sign denotes the major diastereoisomer. **<sup>1</sup>H NMR (400 MHz, CDCl<sub>3</sub>):** 7.43-7.31<sup>+</sup> (m, 10H), 5.70-5.58<sup>+</sup> (m, 2H), 5.43<sup>+</sup> (d, *J* = 16.9 Hz, 2H), 5.38<sup>+</sup> (d, *J* = 10.5 Hz, 2H), 5.29-5.19<sup>+</sup> (m, 4H), 2.64\* (q, *J* = 8.9 Hz, 1H), 2.59 (q, *J* = 8.5 Hz, 1H), 2.00 (dd, *J* = 9.0; 5.1 Hz, 1H), 1.99-1.88\* (m, 2H), 1.67 (dd, *J* = 7.9; 5.1 Hz, 1H). **<sup>13</sup>C NMR (100 MHz, CDCl<sub>3</sub>):**  $\delta$  167.1, 165.1\*, 134.8\*, 134.7, 132.0, 130.4\*, 128.72<sup>+</sup> (3C), 128.67 (2C), 128.6\*, 128.2 (2C), 128.1\* (2C), 121.6\*, 121.0, 118.5\*, 116.5, 68.4, 68.2\*, 36.0\*, 34.0, 24.1, 22.7\*, 21.2, 20.4\*. **HRMS (ESI+)** *m/z* calcd. for C<sub>14</sub>H<sub>13</sub>NO<sub>2</sub> [M+Na]<sup>+</sup>: 250.0838; found: 250.0841.

<sup>1</sup> (a) Wu, J.-Q.; Qiu, Z.-P.; Zhang, S.-S.; Liu, J.-G.; Lao, Y.-X.; Gu, L.-Q.; Huang, Z.-S.; Li, J.; Wang, H. *Chem. Commun.* **2015**, 51, 77. (b) Dieskau, A. P.; Holzwarth, M. S.; Plietker, B. *J. Am. Chem. Soc.* **2012**, 134, 5048.

<sup>2</sup> Battistuzzi, G.; Cacchi, S.; Fabrizi, G. *Org. Lett.* **2003**, 5, 777.

### 3. General procedure for the asymmetric [3+2] cycloaddition

#### Procedure:

A glass vial equipped with a magnetic stirring bar was charged with vinyl cyclopropane **1** (0.20 mmol, 1.0 equiv.),  $\alpha,\beta$ -unsaturated aldehyde **2** (0.30 mmol, 1.5 equiv.), aminocatalyst **3** (0.02 mmol, 0.10 equiv.), PhCO<sub>2</sub>H (0.02 mmol, 0.10 equiv.) and MeCN (0.5 mL). Pd(dba)<sub>2</sub> (0.006 mmol, 0.03 equiv.) was then added. The mixture was stirred for 16 h at ambient temperature. The crude product was concentrated *in vacuo* and then loaded onto the column using CH<sub>2</sub>Cl<sub>2</sub>. FC on silica gel yielded product **4**.

NOTE: No precautions were taken to exclude moisture or air when setting up the reaction.

#### Characterization data for new compounds:

##### (2S,3S,4R)-3-formyl-2-phenyl-4-vinylcyclopentane-1,1-dicarbonitrile, **4a**

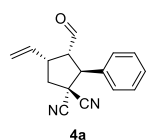

Isolated in 90% yield (45 mg) as a colorless oil by FC on silica using EtOAc/pentane 1:11 as eluent.  $[\alpha]_D^{22} = -21.2$  (c 1.5, CH<sub>2</sub>Cl<sub>2</sub>). <sup>1</sup>H NMR (400 MHz, CDCl<sub>3</sub>):  $\delta$  9.67 (d, *J* = 1.3 Hz, 1H), 7.46-7.40 (m, 5H), 5.72 (ddd, *J* = 16.9; 10.0; 8.3 Hz, 1H), 5.35 (d, *J* = 16.9 Hz, 1H), 5.28 (d, *J* = 10.0 Hz, 1H), 4.26 (d, *J* = 9.5 Hz, 1H), 3.81-3.67 (m, 2H), 2.83 (dd, *J* = 13.4; 6.4 Hz, 1H), 2.36 (dd, *J* = 13.3; 10.2 Hz, 1H). <sup>13</sup>C NMR (100 MHz, CDCl<sub>3</sub>):  $\delta$  199.9, 133.8, 133.2, 129.5, 129.3 (2C), 128.3 (2C), 119.8, 114.8, 114.1, 55.7, 53.6, 43.60, 43.55, 41.7. HRMS (ESI+) *m/z* calcd. for C<sub>16</sub>H<sub>14</sub>N<sub>2</sub>O [M+H]<sup>+</sup>: 251.1179; found: 251.1182. Enantiomeric excess was measured after Wittig reaction with Ph<sub>3</sub>PCHCN to form the corresponding unsaturated nitrile **4a'**. UPC<sup>2</sup>: IA, CO<sub>2</sub>/MeOH gradient, 3.0 mL·min<sup>-1</sup>; *t*<sub>major</sub> = 2.79 min; *t*<sub>minor</sub> = 2.64 min.

##### (2S,3S,4R)-3-Formyl-2-(4-methoxyphenyl)-4-vinylcyclopentane-1,1-dicarbonitrile, **4b**

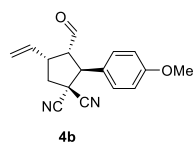

Isolated in 89% yield (50 mg) as a yellow solid by FC on silica using EtOAc/pentane 1:10 -> 1:5 as eluent.  $[\alpha]_D^{22} = -19.0$  (c 0.2, CH<sub>2</sub>Cl<sub>2</sub>). <sup>1</sup>H NMR (400 MHz, CDCl<sub>3</sub>):  $\delta$  9.66 (d, *J* = 1.2 Hz, 1H), 7.37 (d, *J* = 8.7 Hz, 2H), 6.93 (d, *J* = 8.7 Hz, 2H), 5.71 (ddd, *J* = 16.7; 10.0; 8.1 Hz, 1H), 5.34 (d, *J* = 16.7 Hz, 1H), 5.27 (d, *J* = 10.0 Hz, 1H), 4.23-4.18 (m, 1H), 3.80 (s, 3H), 3.77-3.63 (m, 2H), 2.85-2.77 (m, 1H), 2.38-2.29 (m, 1H). <sup>13</sup>C NMR (100 MHz, CDCl<sub>3</sub>):  $\delta$  199.1, 160.4, 133.9, 129.5 (2C), 125.0, 119.7, 114.9, 114.7 (2C), 114.3, 55.9, 55.4, 53.3, 43.5, 43.4, 42.0. HRMS (ESI+) *m/z* calcd. for C<sub>17</sub>H<sub>16</sub>N<sub>2</sub>O<sub>2</sub> [M+Na]<sup>+</sup>: 303.1104; found: 303.1106. Enantiomeric excess was measured after Wittig reaction with Ph<sub>3</sub>PCHCO<sub>2</sub>Bn to form the corresponding unsaturated ester **4b'**. UPC<sup>2</sup>: IC, CO<sub>2</sub>/*i*-PrOH gradient, 3.0 mL·min<sup>-1</sup>; *t*<sub>major</sub> = 3.60 min; *t*<sub>minor</sub> = 3.41 min.

##### (2S,3S,4R)-2-(4-Chlorophenyl)-3-formyl-4-vinylcyclopentane-1,1-dicarbonitrile, **4c**

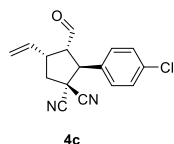

Isolated in 89% yield (50.7 mg) as a yellow solid by FC on silica gel using EtOAc/pentane 1:10 as eluent.  $[\alpha]_D^{22} = -27.1$  (c 0.3, CH<sub>2</sub>Cl<sub>2</sub>). <sup>1</sup>H NMR (400 MHz, CDCl<sub>3</sub>):  $\delta$  9.68 (s, 1H), 7.47-7.34 (m, 4H), 5.77-5.64 (m, 1H), 5.42-5.26 (m, 2H), 4.27-4.17 (m, 1H), 3.80-3.66 (m, 2H), 2.85 (ddd, *J* = 13.3; 6.8; 3.1 Hz, 1H), 2.41-2.28 (m, 1H). <sup>13</sup>C NMR (100 MHz, CDCl<sub>3</sub>):  $\delta$  198.6, 135.7, 133.7, 131.7, 129.6 (4C), 120.2, 114.5, 114.0, 55.8, 53.1, 43.6, 43.5, 41.6. HRMS (ESI+) *m/z* calcd. for C<sub>16</sub>H<sub>13</sub>N<sub>2</sub>OCl [M+H]<sup>+</sup>: 285.0789; found: 285.0792. Enantiomeric excess was measured after Wittig reaction

with  $\text{Ph}_3\text{PCHCN}$  to form the corresponding unsaturated nitrile **4c'**. UPC<sup>2</sup>: IA,  $\text{CO}_2/i\text{-PrOH}$  gradient,  $3.0\text{ mL}\cdot\text{min}^{-1}$ ;  $t_{\text{major}} = 3.05\text{ min}$ ;  $t_{\text{minor}} = 2.98\text{ min}$ .

#### Ethyl 4-((1S,4R,5S)-2,2-dicyano-5-formyl-4-vinylcyclopentyl)benzoate, **4d**

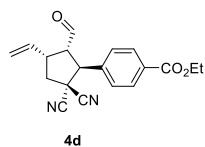

Isolated in 84% yield (54.1 mg) as a pale yellow solid by FC on silica gel using EtOAc/pentane 1:20  $\rightarrow$  1:5 as eluent.  $[\alpha]_D^{22} = -29.0$  (c 0.1,  $\text{CH}_2\text{Cl}_2$ ). **<sup>1</sup>H NMR (400 MHz,  $\text{CDCl}_3$ )**:  $\delta$  9.69 (s, 1H), 8.11 (dd,  $J = 11.4$ ; 4.8 Hz, 2H), 7.52 (d,  $J = 8.3$  Hz, 2H), 5.72 (ddd,  $J = 17.0$ ; 10.0; 8.4 Hz, 1H), 5.38 (d,  $J = 17.0$  Hz, 1H), 5.31 (d,  $J = 10.0$  Hz, 1H), 4.39 (q,  $J = 7.1$  Hz, 2H), 4.31 (d,  $J = 9.4$  Hz, 1H), 3.78 (dq,  $J = 19.8$ ; 10.9 Hz, 2H), 2.86 (dd,  $J = 13.4$ ; 6.5 Hz, 1H), 2.36 (dt,  $J = 18.6$ ; 9.3 Hz, 1H), 1.39 (t,  $J = 7.1$  Hz, 3H). **<sup>13</sup>C NMR (100 MHz,  $\text{CDCl}_3$ )**:  $\delta$  198.6, 165.9, 138.0, 133.6, 131.7, 130.5 (2C), 128.4 (2C), 120.2, 114.5, 113.9, 61.4, 55.7, 53.4, 43.66, 43.61, 41.5, 14.4. **HRMS (ESI+)**  $m/z$  calcd. for  $\text{C}_{19}\text{H}_{18}\text{N}_2\text{O}_3$   $[\text{M}+\text{H}]^+$ : 323.1390; found: 323.1391. Enantiomeric excess was measured after Wittig reaction with  $\text{Ph}_3\text{PCHCO}_2\text{Bn}$  to form the corresponding unsaturated ester **4d'**. UPC<sup>2</sup>: IC,  $\text{CO}_2/i\text{-PrOH}$  gradient,  $3.0\text{ mL}\cdot\text{min}^{-1}$ ;  $t_{\text{major}} = 4.13\text{ min}$ ;  $t_{\text{minor}} = 3.95\text{ min}$ .

#### (2S,3S,4R)-3-Formyl-2-(4-nitrophenyl)-4-vinylcyclopentane-1,1-dicarbonitrile, **4e**

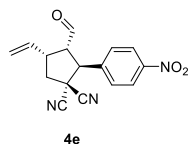

Isolated in 92% yield (54.3 mg) as a yellow solid by FC on silica gel using EtOAc/pentane 1:5 as eluent.  $[\alpha]_D^{22} = -67.3$  (c 0.2,  $\text{CH}_2\text{Cl}_2$ ). **<sup>1</sup>H NMR (400 MHz,  $\text{CDCl}_3$ )**:  $\delta$  9.70 (s, 1H), 8.36-8.25 (m, 2H), 7.71-7.60 (m, 2H), 5.77-5.64 (m, 1H), 5.46-5.31 (m, 2H), 4.41-4.26 (m, 1H), 3.89-3.72 (m, 2H), 2.94-2.86 (m, 1H), 2.39 (ddd,  $J = 10.2$ ; 8.0; 3.8 Hz, 1H). **<sup>13</sup>C NMR (100 MHz,  $\text{CDCl}_3$ )**:  $\delta$  198.1, 148.7, 140.3, 133.4, 129.5 (2C), 124.5 (2C), 120.6, 114.2, 113.7, 55.8, 53.0, 43.6, 43.4, 41.2. **HRMS (ESI+)**  $m/z$  calcd. for  $\text{C}_{16}\text{H}_{13}\text{N}_3\text{O}_3$   $[\text{M}+\text{H}]^+$ : 296.1030; found: 296.1033. Enantiomeric excess was measured after Wittig reaction with  $\text{Ph}_3\text{PCHCN}$  to form the corresponding unsaturated nitrile **4e'**. UPC<sup>2</sup>: IC,  $\text{CO}_2/i\text{-PrOH}$  gradient,  $3.0\text{ mL}\cdot\text{min}^{-1}$ ;  $t_{\text{major}} = 3.30\text{ min}$ ;  $t_{\text{minor}} = 3.17\text{ min}$ .

#### (2S,3S,4R)-3-Formyl-2-(3-methoxyphenyl)-4-vinylcyclopentane-1,1-dicarbonitrile, **4f**

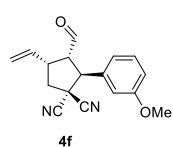

Isolated in 89% yield (49.9 mg) as a yellow oil by FC on silica using EtOAc/pentane 1:10  $\rightarrow$  1:5 as eluent.  $[\alpha]_D^{22} = -16.0$  (c 0.2,  $\text{CH}_2\text{Cl}_2$ ). **<sup>1</sup>H NMR (400 MHz,  $\text{CDCl}_3$ )**:  $\delta$  9.66 (d,  $J = 1.3$  Hz, 1H), 7.33 (t,  $J = 8.0$  Hz, 1H), 7.05-6.89 (m, 3H), 5.71 (ddd,  $J = 16.8$ ; 10.1; 8.3 Hz, 1H), 5.34 (d,  $J = 16.8$  Hz, 1H), 5.27 (d,  $J = 10.1$  Hz, 1H), 4.22 (d,  $J = 9.5$  Hz, 1H), 3.84-3.64 (m, 2H), 3.82 (s, 3H), 2.82 (dd,  $J = 13.3$ ; 6.4 Hz, 1H), 2.35 (dd,  $J = 13.3$ ; 10.1 Hz, 1H). **<sup>13</sup>C NMR (100 MHz,  $\text{CDCl}_3$ )**:  $\delta$  199.0, 160.1, 134.7, 133.8, 130.3, 120.3, 119.8, 114.84, 114.82, 114.16, 114.13, 55.7, 55.4, 53.5, 43.6, 43.5, 41.6. **HRMS (ESI+)**  $m/z$  calcd. for  $\text{C}_{17}\text{H}_{16}\text{N}_2\text{O}_2$   $[\text{M}+\text{H}]^+$ : 281.1285; found: 281.1287. Enantiomeric excess was measured after Wittig reaction with  $\text{Ph}_3\text{PCHCN}$  to form the corresponding unsaturated nitrile **4f'**. UPC<sup>2</sup>: IC,  $\text{CO}_2/i\text{-PrOH}$  gradient,  $3.0\text{ mL}\cdot\text{min}^{-1}$ ;  $t_{\text{major}} = 3.15\text{ min}$ ;  $t_{\text{minor}} = 3.25\text{ min}$ .

#### (2S,3S,4R)-3-Formyl-2-(o-tolyl)-4-vinylcyclopentane-1,1-dicarbonitrile, **4g**

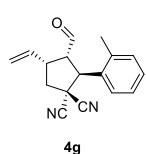

Isolated in 82% yield (43.3 mg) as a pale yellow solid by FC on silica gel using EtOAc/pentane 1:20  $\rightarrow$  1:5 as eluent.  $[\alpha]_D^{22} = -13.8$  (c 0.1,  $\text{CH}_2\text{Cl}_2$ ). **<sup>1</sup>H NMR (400 MHz,  $\text{CDCl}_3$ )**:  $\delta$  9.66 (s, 1H), 7.49-7.41 (m, 1H), 7.33-7.21 (m, 3H), 5.74 (ddd,  $J = 17.1$ ; 10.0; 8.4 Hz, 1H), 5.44-5.25 (m, 2H), 4.76 (d,  $J = 8.9$  Hz, 1H), 3.85-3.65 (m, 2H), 2.88-2.79 (m, 1H), 2.61 (s, 3H), 2.39 (dd,  $J = 13.2$ ;

10.6 Hz, 1H). **<sup>13</sup>C NMR (100 MHz, CDCl<sub>3</sub>)**: δ 199.3, 138.0, 133.7, 132.2, 131.4, 129.1, 127.0, 126.8, 119.9, 115.1, 114.5, 58.3, 47.9, 44.2, 44.1, 40.7, 20.1. **HRMS (ESI+)** *m/z* calcd. for C<sub>17</sub>H<sub>16</sub>N<sub>2</sub>O [M+H]<sup>+</sup>: 265.1335; found: 265.1338. Enantiomeric excess was measured after Wittig reaction with Ph<sub>3</sub>PCHCN to form the corresponding unsaturated nitrile **4g'**. **UPC<sup>2</sup>**: IC, CO<sub>2</sub>/*i*-PrOH gradient, 3.0 mL·min<sup>-1</sup>; *t*<sub>major</sub> = 2.95 min; *t*<sub>minor</sub> = 2.90 min.

**(2R,3S,4R)-2-(2-Fluorophenyl)-3-formyl-4-vinylcyclopentane-1,1-dicarbonitrile, 4h**

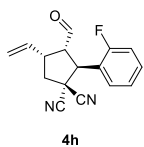

Isolated in 62% yield (33.3 mg) as a pale yellow solid by FC on silica gel using EtOAc/pentane 1:20 → 1:5 as eluent.  $[\alpha]_D^{22} = -37.1$  (c 0.1, CH<sub>2</sub>Cl<sub>2</sub>). **<sup>1</sup>H NMR (400 MHz, CDCl<sub>3</sub>)**: δ 9.68 (d, *J* = 0.9 Hz, 1H), 7.49-7.35 (m, 2H), 7.24-7.13 (m, 2H), 5.77 (ddd, *J* = 17.0; 10.1; 8.4 Hz, 1H), 5.38 (d, *J* = 17.0 Hz, 1H), 5.31 (d, *J* = 10.1 Hz, 1H), 4.65 (d, *J* = 9.2 Hz, 1H), 3.79 (dt, *J* = 15.8; 9.6 Hz, 2H), 2.85 (dd, *J* = 13.3; 6.4 Hz, 1H), 2.40 (dd, *J* = 13.3; 10.1 Hz, 1H). **<sup>13</sup>C NMR (100 MHz, CDCl<sub>3</sub>)**: δ 198.8, 161.4 (d, <sup>1</sup>*J*<sub>C-F</sub> = 248.9 Hz), 133.5, 131.3 (d, <sup>3</sup>*J*<sub>C-F</sub> = 8.7 Hz), 129.3 (d, <sup>4</sup>*J*<sub>C-F</sub> = 3.1 Hz), 125.0 (d, <sup>3</sup>*J*<sub>C-F</sub> = 3.7 Hz), 120.9 (d, <sup>2</sup>*J*<sub>C-F</sub> = 13.1 Hz), 120.1, 116.6 (d, <sup>2</sup>*J*<sub>C-F</sub> = 22.4 Hz), 114.6, 114.2, 56.0 (d, <sup>4</sup>*J*<sub>C-F</sub> = 2.3 Hz), 46.9, 43.9, 43.6, 40.7. **<sup>19</sup>F NMR (376 MHz, CDCl<sub>3</sub>)** δ -113.95. **HRMS (ESI+)** *m/z* calcd. for C<sub>16</sub>H<sub>13</sub>N<sub>2</sub>OF [M+H]<sup>+</sup>: 269.1085; found: 269.1086. Enantiomeric excess was measured after Wittig reaction with Ph<sub>3</sub>PCHCN to form the corresponding unsaturated nitrile **4h'**. **UPC<sup>2</sup>**: IC, CO<sub>2</sub>/*i*-PrOH gradient, 3.0 mL·min<sup>-1</sup>; *t*<sub>major</sub> = 2.56 min; *t*<sub>minor</sub> = 2.65 min.

**(2S,3S,4R)-2-(3,5-Dimethylphenyl)-3-formyl-4-vinylcyclopentane-1,1-dicarbonitrile, 4i**

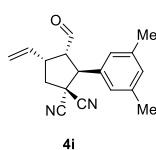

Isolated in 83% yield (46.2 mg) as a pale yellow solid by FC on silica gel using EtOAc/pentane 1:20 → 1:5 as eluent.  $[\alpha]_D^{22} = -35.4$  (c 0.1, CH<sub>2</sub>Cl<sub>2</sub>). **<sup>1</sup>H NMR (400 MHz, CDCl<sub>3</sub>)**: δ 9.68 (d, *J* = 1.2 Hz, 1H), 7.03 (s, 3H), 5.73 (ddd, *J* = 17.0; 10.0; 8.4 Hz, 1H), 5.35 (d, *J* = 17.0 Hz, 1H), 5.28 (d, *J* = 10.0 Hz, 1H), 4.18 (d, *J* = 9.5 Hz, 1H), 3.81-3.64 (m, 2H), 2.82 (dd, *J* = 13.3; 6.5 Hz, 1H), 2.35-2.32 (m, 7H). **<sup>13</sup>C NMR (100 MHz, CDCl<sub>3</sub>)**: δ 199.2, 138.9, 133.9, 133.1 (2C), 131.3, 126.0 (2C), 119.8, 114.9, 114.2, 55.9, 53.6, 43.76, 43.75, 41.8, 21.5 (2C). **HRMS (ESI+)** *m/z* calcd. for C<sub>18</sub>H<sub>18</sub>N<sub>2</sub>O [M+H]<sup>+</sup>: 279.1492; found: 279.1494. Enantiomeric excess was measured after Wittig reaction with Ph<sub>3</sub>PCHCN to form the corresponding unsaturated nitrile **4i'**. **UPC<sup>2</sup>**: IC, CO<sub>2</sub>/*i*-PrOH gradient, 3.0 mL·min<sup>-1</sup>; *t*<sub>major</sub> = 2.55 min; *t*<sub>minor</sub> = 2.45 min.

**(2S,3S,4R)-3-Formyl-2-(naphthalen-1-yl)-4-vinylcyclopentane-1,1-dicarbonitrile, 4j**

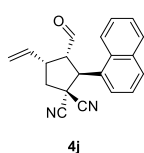

Isolated in 86% yield (51.7 mg) as a white solid by FC on silica using EtOAc/pentane 1:10 as eluent.  $[\alpha]_D^{22} = -26.3$  (c 2.0, CH<sub>2</sub>Cl<sub>2</sub>). **<sup>1</sup>H NMR (400 MHz, CDCl<sub>3</sub>)**: δ 9.69 (d, *J* = 1.3 Hz, 1H), 7.93-7.85 (m, 4H), 7.58-7.52 (m, 3H), 5.73 (ddd, *J* = 16.9; 10.1; 8.7 Hz, 1H), 5.36 (d, *J* = 16.9 Hz, 1H), 5.29 (d, *J* = 10.1 Hz, 1H), 4.44 (d, *J* = 10.0 Hz, 1H), 3.93-3.88 (m, 1H), 3.76 (tdd, *J* = 11.3; 10.1; 1.4 Hz, 1H), 2.85 (dd, *J* = 11.3; 10.1 Hz, 1H), 2.39 (dd, *J* = 13.3; 10.6 Hz, 1H). **<sup>13</sup>C NMR (100 MHz, CDCl<sub>3</sub>)**: δ 199.0, 133.8, 133.6, 133.3, 130.6, 129.3, 128.3, 128.0, 127.8, 127.0, 126.8, 125.3, 119.8, 114.8, 114.2, 55.8, 53.8, 43.64, 43.59, 41.7. **HRMS (ESI+)** *m/z* calcd. for C<sub>20</sub>H<sub>16</sub>N<sub>2</sub>O [M+H]<sup>+</sup>: 301.1335; found: 301.1338. Enantiomeric excess was measured after Wittig reaction with Ph<sub>3</sub>PCHCN to form the corresponding unsaturated nitrile **4j'**. **UPC<sup>2</sup>**: IC, CO<sub>2</sub>/*i*-PrOH gradient, 3.0 mL·min<sup>-1</sup>; *t*<sub>major</sub> = 3.60 min; *t*<sub>minor</sub> = 3.73 min.

#### (2R,3S,4R)-3-Formyl-2-(furan-2-yl)-4-vinylcyclopentane-1,1-dicarbonitrile, 4k

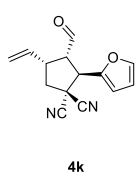

Isolated in 91% yield (43.7 mg) as a yellow oil by FC on silica using EtOAc/pentane 1:10 as eluent.  $[\alpha]_D^{22} = -44.4$  (c 1.3, CH<sub>2</sub>Cl<sub>2</sub>). <sup>1</sup>H NMR (400 MHz, CDCl<sub>3</sub>): δ 9.70 (d, *J* = 1.2 Hz, 1H), 7.45 (dd, *J* = 1.8; 0.8 Hz, 1H), 6.43 (d, 3.3 Hz, 1H), 6.38 (dd, *J* = 3.4; 1.9 Hz, 1H), 5.70 (ddd, *J* = 16.9; 10.1; 8.6 Hz, 1H), 5.36 (d, *J* = 16.9 Hz, 1H), 5.28 (d, *J* = 10.1 Hz, 1H), 4.42 (d, *J* = 9.2 Hz, 1H), 3.81-3.76 (m, 1H), 3.73-3.63 (m, 1H), 2.77 (dd, *J* = 13.3; 6.5 Hz, 1H), 2.29 (dd, *J* = 13.3; 10.8 Hz, 1H).

<sup>13</sup>C NMR (100 MHz, CDCl<sub>3</sub>): δ 198.7, 147.5, 143.8, 133.4, 120.1, 114.7, 113.8, 110.9, 109.6, 54.7, 47.4, 43.5, 43.1, 39.8. HRMS (ESI+) *m/z* calcd. for C<sub>14</sub>H<sub>12</sub>N<sub>2</sub>O<sub>2</sub> [M+Na]<sup>+</sup>: 263.0791; found: 263.0794. Enantiomeric excess was measured after Wittig reaction with Ph<sub>3</sub>PCHCN to form the corresponding unsaturated nitrile **4k'**. UPC<sup>2</sup>: IC, CO<sub>2</sub>/ *i*-PrOH gradient, 3.0 mL·min<sup>-1</sup>; *t*<sub>major</sub> = 3.01 min; *t*<sub>minor</sub> = 3.14 min.

#### (2R,3S,4R)-2-Ethyl-3-formyl-4-vinylcyclopentane-1,1-dicarbonitrile, 4l

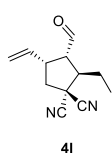

Isolated in 89% yield (36 mg) as a clear oil by FC on silica using EtOAc/pentane 1:10 as eluent.  $[\alpha]_D^{22} = -27.0$  (c 0.2, CH<sub>2</sub>Cl<sub>2</sub>). <sup>1</sup>H NMR (400 MHz, CDCl<sub>3</sub>): δ 9.70 (d, *J* = 1.5 Hz, 1H), 5.66 (ddd, *J* = 16.9; 10.1; 8.4 Hz, 1H), 5.29 (d, *J* = 16.9 Hz, 1H), 5.24 (d, *J* = 10.1 Hz, 1H), 3.52-3.39 (m, 1H), 3.07 (q, *J* = 8.0 Hz, 1H), 3.02-2.95 (m, 1H), 2.64 (dd, *J* = 13.1; 6.2 Hz, 1H), 2.20 (dd, *J* = 13.1; 11.8 Hz, 1H), 1.90-1.78 (m, 1H), 1.74-1.62 (m, 1H), 1.06 (t, *J* = 7.5 Hz, 3H). <sup>13</sup>C NMR (100 MHz, CDCl<sub>3</sub>): δ 200.0, 133.5, 119.7, 115.6, 114.0, 57.3, 50.0, 44.1, 43.2, 38.6, 25.4, 12.5. HRMS (ESI+) *m/z* calcd. for C<sub>12</sub>H<sub>14</sub>N<sub>2</sub>O [M+Na]<sup>+</sup>: 225.0998; found: 225.1005. Enantiomeric excess was measured after Wittig reaction with Ph<sub>3</sub>PCHCOPh to form the corresponding unsaturated ketone **4l'**. UPC<sup>2</sup>: IC, CO<sub>2</sub>/ *i*-PrOH 90:10, 3.0 mL·min<sup>-1</sup>; *t*<sub>major</sub> = 3.85 min; *t*<sub>minor</sub> = 3.46 min.

#### Methyl (1R,2S,3S,4R)-1-cyano-3-formyl-2-phenyl-4-vinylcyclopentane-1-carboxylate, 4m

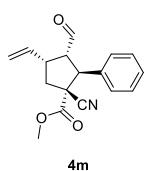

Isolated in 87% yield (49.3 mg) as a yellow solid by FC on silica using EtOAc/pentane 1:11 as eluent.  $[\alpha]_D^{22} = -36.6$  (c 1.0, CH<sub>2</sub>Cl<sub>2</sub>). <sup>1</sup>H NMR (400 MHz, CDCl<sub>3</sub>): δ 9.67 (d, *J* = 1.5 Hz, 1H), 7.35-7.29 (m, 5H), 5.78 (ddd, *J* = 16.7; 10.1; 8.3 Hz, 1H), 5.30 (dd, *J* = 16.7; 0.7 Hz, 1H), 5.21 (dd, *J* = 10.1; 0.8 Hz, 1H), 4.31 (d, *J* = 10.0 Hz, 1H), 3.75 (s, 3H), 3.73-3.69 (m, 2H), 2.63 (dd, *J* = 13.3; 6.9 Hz, 1H), 2.35 (dd, *J* = 13.3; 9.7 Hz, 1H). <sup>13</sup>C NMR (100 MHz, CDCl<sub>3</sub>): δ 200.3, 168.2, 135.4, 135.1, 128.9 (2C), 128.7, 128.2 (2C), 118.7, 117.9, 57.1, 55.4, 53.9, 52.5, 43.7, 43.2. HRMS (ESI+) *m/z* calcd. for C<sub>17</sub>H<sub>17</sub>NO<sub>3</sub> [M+H]<sup>+</sup>: 284.1281; found: 284.1276. Enantiomeric excess was measured after reduction with NaBH<sub>4</sub> (3 equiv.) to form the corresponding diol **4m'** (both aldehyde and ester moiety were reduced). UPC<sup>2</sup>: ID, CO<sub>2</sub>/*i*-PrOH gradient, 3.0 mL·min<sup>-1</sup>; *t*<sub>major</sub> = 3.44 min; *t*<sub>minor</sub> = 3.52 min.

#### Methyl (1R,2S,3S,4R)-1-cyano-3-formyl-2-(4-methoxyphenyl)-4-vinylcyclopentane-1-carboxylate, 4n

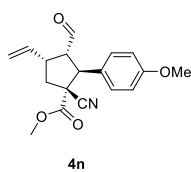

Isolated in 87% yield (54.5 mg) as a yellow oil by FC on silica using EtOAc/pentane 1:10 as eluent.  $[\alpha]_D^{22} = -32.3$  (c 2.0, CH<sub>2</sub>Cl<sub>2</sub>). <sup>1</sup>H NMR (400 MHz, CDCl<sub>3</sub>): δ 9.66 (d, *J* = 1.4 Hz, 1H), 7.26 (d, *J* = 8.7 Hz, 2H), 6.87 (d, *J* = 8.7 Hz, 2H), 5.78 (ddd, *J* = 16.8; 10.0; 8.5 Hz, 1H), 5.30 (d, *J* = 16.8 Hz, 1H), 5.21 (d, *J* = 10.0 Hz, 1H), 4.26 (d, *J* = 10.2 Hz, 1H), 3.78 (s, 3H), 3.76 (s, 3H), 3.69-3.67 (m, 2H), 2.65-2.60 (m, 1H), 2.37-2.31 (m, 1H). <sup>13</sup>C NMR (100 MHz, CDCl<sub>3</sub>): δ 200.4, 168.3, 159.7, 135.4, 129.3 (2C), 126.9, 118.6, 118.0, 114.3 (2C), 57.2, 55.5, 55.3, 53.9, 52.0, 43.5, 43.0. HRMS (ESI+) *m/z* calcd. for C<sub>18</sub>H<sub>19</sub>NO<sub>4</sub> [M+H]<sup>+</sup>: 314.1387; found: 314.1386. Enantiomeric excess was

measured after Wittig reaction with Ph<sub>3</sub>PCHCN to form the corresponding unsaturated nitrile **4n'**. **UPC**<sup>2</sup>: IA, CO<sub>2</sub>/*i*-PrOH gradient, 3.0 mL·min<sup>-1</sup>; *t*<sub>major</sub> = 3.26 min; *t*<sub>minor</sub> = 3.33 min.

#### Methyl (1R,2S,3S,4R)-2-(4-chlorophenyl)-1-cyano-3-formyl-4-vinylcyclopentane-1-carboxylate, **4o**

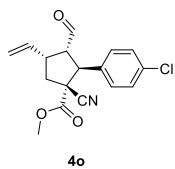

Isolated in 88% yield (55.9 mg) as a yellow oil by FC on silica using EtOAc/pentane 1:10 as eluent.  $[\alpha]_D^{22} = -37.0$  (c 0.2, CH<sub>2</sub>Cl<sub>2</sub>). **<sup>1</sup>H NMR (400 MHz, CDCl<sub>3</sub>)**: δ 9.67 (d, *J* = 1.3 Hz, 1H), 7.38-7.19 (m, 4H), 5.82-5.69 (m, 1H), 5.32 (d, *J* = 16.9 Hz, 1H), 5.23 (d, *J* = 10.1 Hz, 1H), 4.28 (d, *J* = 10.1 Hz, 1H), 3.88-3.62 (m, 2H), 3.78 (s, 3H), 2.65 (dd, *J* = 13.3; 6.9 Hz, 1H), 2.32 (dd, *J* = 13.3; 9.7 Hz, 1H). **<sup>13</sup>C NMR (100 MHz, CDCl<sub>3</sub>)**: δ 199.9, 168.0, 135.2, 134.7, 133.7, 129.7

(2C), 129.2 (2C), 119.0, 117.8, 57.2, 55.2, 54.0, 51.7, 43.5, 43.2. **HRMS (ESI+)** *m/z* calcd. for C<sub>17</sub>H<sub>16</sub>N<sub>3</sub>OCl [M+Na]<sup>+</sup>: 340.0711; found: 340.0712. Enantiomeric excess was measured after Wittig reaction with Ph<sub>3</sub>PCHCN to form the corresponding unsaturated nitrile **4o'**. **UPC**<sup>2</sup>: IC, CO<sub>2</sub>/*i*-PrOH gradient, 3.0 mL·min<sup>-1</sup>; *t*<sub>major</sub> = 3.04 min; *t*<sub>minor</sub> = 3.10 min.

#### Ethyl 4-((1S,2R,4R,5S)-2-cyano-5-formyl-2-(methoxycarbonyl)-4-vinylcyclopentyl)benzoate, **4p**

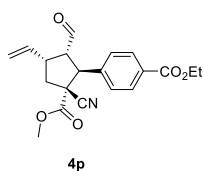

Isolated in 80% yield (56.9 mg) as a yellow oil by FC on silica using EtOAc/pentane 1:10 -> 1:5 as eluent.  $[\alpha]_D^{22} = -28.0$  (c 0.2, CH<sub>2</sub>Cl<sub>2</sub>). **<sup>1</sup>H NMR (400 MHz, CDCl<sub>3</sub>)**: δ 9.68 (s, 1H), 8.02 (d, *J* = 8.1 Hz, 2H), 7.41 (d, *J* = 8.1 Hz, 2H), 5.82-5.70 (m, 1H), 5.32 (d, *J* = 16.9 Hz, 1H), 5.23 (d, *J* = 10.4 Hz, 1H), 4.41-4.29 (m, 3H), 3.78-3.70 (m, 1H), 3.76 (s, 3H), 2.70-2.59 (m, 1H), 2.38-2.28 (m, 1H), 1.62-1.55 (m, 1H), 1.37 (t, *J* = 7.1 Hz, 3H). **<sup>13</sup>C NMR (100 MHz, CDCl<sub>3</sub>)**: δ 199.9, 168.0, 166.2, 140.1, 135.2, 130.9, 130.2 (2C), 128.3 (2C), 119.0, 117.7, 61.2, 57.1, 55.1,

54.1, 52.1, 43.6, 43.3, 14.5. **HRMS (ESI+)** *m/z* calcd. for C<sub>20</sub>H<sub>21</sub>NO<sub>5</sub> [M+H]<sup>+</sup>: 356.1492; found: 356.1496. Enantiomeric excess was measured after Wittig reaction with Ph<sub>3</sub>PCHCN to form the corresponding unsaturated nitrile **4p'**. **UPC**<sup>2</sup>: ID, CO<sub>2</sub>/*i*-PrOH gradient, 3.0 mL·min<sup>-1</sup>; *t*<sub>major</sub> = 2.84 min; *t*<sub>minor</sub> = 2.99 min.

#### Benzyl (1R,2S,3S,4R)-1-cyano-3-formyl-2-phenyl-4-vinylcyclopentane-1-carboxylate, **4q**

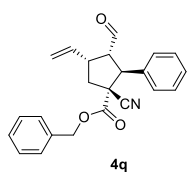

Isolated in 88% yield (63.2 mg) as a yellow oil by FC on silica using EtOAc/pentane 1:10 as eluent.  $[\alpha]_D^{22} = -33.0$  (c 0.2, CH<sub>2</sub>Cl<sub>2</sub>). **<sup>1</sup>H NMR (400 MHz, CDCl<sub>3</sub>)**: δ 9.67 (d, *J* = 1.5 Hz, 1H), 7.36-7.18 (m, 10H), 5.83-5.71 (m, 1H), 5.29 (d, *J* = 17.0 Hz, 1H), 5.20 (d, *J* = 11.4 Hz, 1H), 5.19 (s, 2H), 4.27 (d, *J* = 10.0 Hz, 1H), 3.75-3.65 (m, 2H), 2.67-2.59 (m, 1H), 2.40-2.31 (m, 1H). **<sup>13</sup>C NMR (100 MHz, CDCl<sub>3</sub>)**: δ 200.3, 167.6, 135.4, 135.0, 134.5, 128.9 (2C), 128.8

(2C), 128.62, 128.60, 128.4 (2C), 128.3 (2C), 118.7, 117.9, 68.7, 57.3, 55.5, 52.6, 43.7, 43.1. **HRMS (ESI+)** *m/z* calcd. for C<sub>23</sub>H<sub>21</sub>NO<sub>3</sub> [M+Na]<sup>+</sup>: 382.1414; found: 382.1413. Enantiomeric excess was measured after Wittig reaction with Ph<sub>3</sub>PCHCN to form the corresponding unsaturated nitrile **4q'**. **UPC**<sup>2</sup>: IA, CO<sub>2</sub>/*i*-PrOH gradient, 3.0 mL·min<sup>-1</sup>; *t*<sub>major</sub> = 2.86 min; *t*<sub>minor</sub> = 2.75 min.

#### Benzyl (1R,2S,3S,4R)-1-cyano-3-formyl-2-(4-methoxyphenyl)-4-vinylcyclopentane-1-carboxylate, **4r**

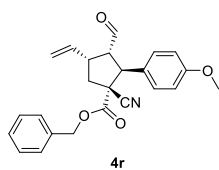

Isolated in 87% yield (67.8 mg) as a yellow oil by FC on silica using EtOAc/pentane 1:10 as eluent.  $[\alpha]_D^{22} = -27.9$  (c 2.0, CH<sub>2</sub>Cl<sub>2</sub>). **<sup>1</sup>H NMR (400 MHz, CDCl<sub>3</sub>)**: δ 9.65 (d, *J* = 1.5 Hz, 1H), 7.35-7.33 (m, 3H), 7.24-7.16 (m, 2H), 7.17 (d, *J* = 8.8 Hz, 2H), 6.78 (d, *J* = 8.7 Hz, 2H), 5.82-5.73 (m, 1H), 5.28 (d, *J* = 16.6 Hz, 1H), 5.30-5.16 (m, 3H), 4.23 (d, *J* = 10.1 Hz, 1H), 3.77 (s, 3H), 3.68-3.66 (m, 2H), 2.65-2.60 (m, 1H), 2.38-2.33 (m, 1H). **<sup>13</sup>C NMR (100**

**MHz, CDCl<sub>3</sub>**):  $\delta$  200.3, 167.6, 159.7, 135.5, 134.5, 129.3 (2C), 128.7 (2C), 128.4 (2C), 126.8, 118.5, 118.0, 114.2 (3C), 68.5, 57.3, 55.6, 55.3, 52.1, 43.5, 42.9. **HRMS** (ESI+)  $m/z$  calcd. for C<sub>24</sub>H<sub>23</sub>NO<sub>4</sub> [M+H]<sup>+</sup>: 390.1700; found: 390.1708. Enantiomeric excess was measured after Wittig reaction with Ph<sub>3</sub>PCHCO<sub>2</sub>Bn to form the corresponding unsaturated ester **4r'**. **UPC**<sup>2</sup>: IC, CO<sub>2</sub>/*i*-PrOH gradient, 3.0 mL·min<sup>-1</sup>;  $t_{\text{major}}$  = 3.95 min;  $t_{\text{minor}}$  = 4.13 min.

**Benzyl (1R,2S,3S,4R)-1-cyano-3-formyl-2-(4-methoxyphenyl)-4-vinylcyclopentane-1-carboxylate, 4s**

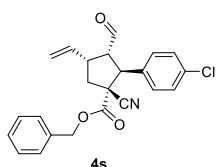

Isolated in 92% yield (72.3 mg) as a yellow oil by FC on silica gel using EtOAc/pentane 1:20 -> 1:5 as eluent.  $[\alpha]_D^{22} = -37.3$  (c 0.2, CH<sub>2</sub>Cl<sub>2</sub>). **<sup>1</sup>H NMR (400 MHz, CDCl<sub>3</sub>)**:  $\delta$  9.65 (d,  $J$  = 1.3 Hz, 1H), 7.38-7.32 (m, 3H), 7.24-7.12 (m, 6H), 5.74 (ddt,  $J$  = 16.9; 10.0; 5.6 Hz, 1H), 5.30 (d,  $J$  = 16.9 Hz, 1H), 5.25-5.13 (m, 3H), 4.21 (d,  $J$  = 10.1 Hz, 1H), 3.73-3.61 (m, 2H), 2.67-2.59 (m, 1H), 2.36-2.28 (m, 1H). **<sup>13</sup>C NMR (100 MHz, CDCl<sub>3</sub>)**:  $\delta$  199.9, 167.3, 135.3, 134.5, 134.4, 133.5, 129.6 (2C), 129.1 (2C), 128.9, 128.8 (2C), 128.5 (2C), 118.9, 117.7, 68.7, 57.2, 55.2, 51.8, 43.5, 42.9. **HRMS** (ESI+)  $m/z$  calcd. for C<sub>23</sub>H<sub>20</sub>NO<sub>3</sub>Cl [M+H]<sup>+</sup>: 394.1204; found: 394.1207. Enantiomeric excess was measured after Wittig reaction with Ph<sub>3</sub>PCHCN to form the corresponding unsaturated nitrile **4s'**. **UPC**<sup>2</sup>: IA, CO<sub>2</sub>/*i*-PrOH gradient, 3.0 mL·min<sup>-1</sup>;  $t_{\text{major}}$  = 3.12 min;  $t_{\text{minor}}$  = 3.03 min.

**Ethyl 4-((1S,2R,4R,5S)-2-((benzyloxy)carbonyl)-2-cyano-5-formyl-4-vinylcyclopentyl)benzoate, 4t**

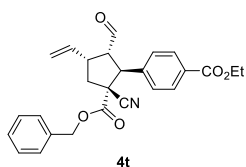

Isolated in 97% yield (83.7 mg) as a yellow oil by FC on silica gel using EtOAc/pentane 1:20 -> 1:5 as eluent.  $[\alpha]_D^{22} = -26.6$  (c 0.3, CH<sub>2</sub>Cl<sub>2</sub>). **<sup>1</sup>H NMR (400 MHz, CDCl<sub>3</sub>)**:  $\delta$  9.66 (s, 1H), 7.90 (d,  $J$  = 8.3 Hz, 2H), 7.42-7.17 (m, 7H), 5.85-5.68 (m, 1H), 5.31 (d,  $J$  = 16.8 Hz, 1H), 5.25-5.13 (m, 3H), 4.37 (q,  $J$  = 7.1 Hz, 2H), 4.29 (d,  $J$  = 9.9 Hz, 1H), 3.78-3.67 (m, 2H), 2.68-2.60 (m, 1H), 2.38-2.28 (m, 1H), 1.39 (t,  $J$  = 7.1 Hz, 3H). **<sup>13</sup>C NMR (100 MHz, CDCl<sub>3</sub>)**:  $\delta$  199.8, 167.3, 166.2, 140.0, 135.2, 134.4, 130.7, 130.1 (2C), 128.9, 128.8 (2C), 128.6 (2C), 128.3 (2C), 119.0, 117.6, 68.8, 61.2, 57.2, 55.2, 52.2, 43.6, 43.1, 14.5. **HRMS** (ESI+)  $m/z$  calcd. for C<sub>26</sub>H<sub>25</sub>NO<sub>5</sub> [M+H]<sup>+</sup>: 432.1805; found: 432.1808. Enantiomeric excess was measured after Wittig reaction with Ph<sub>3</sub>PCHCN to form the corresponding unsaturated nitrile **4t'**. **UPC**<sup>2</sup>: ID, CO<sub>2</sub>/MeOH gradient, 3.0 mL·min<sup>-1</sup>;  $t_{\text{major}}$  = 3.10 min;  $t_{\text{minor}}$  = 3.03 min.

## 4. Synthetic transformations

### Reduction to form alcohol **S1**:

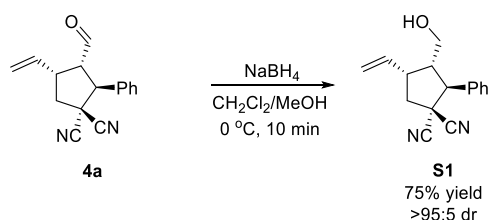

#### Procedure:

Aldehyde **4a** (0.20 mmol, 1.0 equiv.) was dissolved in a mixture  $\text{CH}_2\text{Cl}_2/\text{MeOH}$  (1:1) mixture (2 mL) in a glass vial equipped with a magnetic stirring bar and cooled to 0 °C.  $\text{NaBH}_4$  (0.3 mmol, 1.5 equiv.) was added. After stirring for 10 min., the reaction mixture was diluted with  $\text{CH}_2\text{Cl}_2$  and washed with  $\text{NH}_4\text{Cl}$  (sat. aq.),  $\text{H}_2\text{O}$  and brine. The organic phase was dried over  $\text{Na}_2\text{SO}_4$ , concentrated *in vacuo* and then subjected to purification by FC.

Isolated in 75% yield (37.8 mg) as a white solid by FC on silica using EtOAc/pentane 1:5 as eluent.  $[\alpha]_D^{22} = +29.0$  (c 0.2,  $\text{CH}_2\text{Cl}_2$ ).  $^1\text{H NMR}$  (400 MHz,  $\text{CDCl}_3$ ):  $\delta$  7.50-7.34 (m, 5H), 6.04 (ddd,  $J = 8.5$ ; 5.4; 2.8 Hz, 1H), 5.27 (d,  $J = 7.4$  Hz, 1H), 5.24 (s, 1H), 3.73-3.64 (m, 2H), 3.52 (d,  $J = 11.3$ ; 5.5 Hz, 1H), 3.33 (dq,  $J = 9.8$ ; 7.5 Hz, 1H), 2.89-2.75 (m, 2H), 2.44 (dd,  $J = 13.2$ ; 9.9 Hz, 1H), 1.41 (t,  $J = 5.1$  Hz, 1H).  $^{13}\text{C NMR}$  (100 MHz,  $\text{CDCl}_3$ ):  $\delta$  136.2, 133.8, 129.3, 129.2 (2C), 128.6 (2C), 118.4, 115.6, 114.7, 60.2, 56.1, 46.4, 43.8, 43.1, 41.8. HRMS (ESI+)  $m/z$  calcd. for  $\text{C}_{16}\text{H}_{16}\text{N}_2\text{O}$   $[\text{M}+\text{Na}]^+$ : 275.1155; found: 275.1159.

### Hydrolysis to form amide **5**:

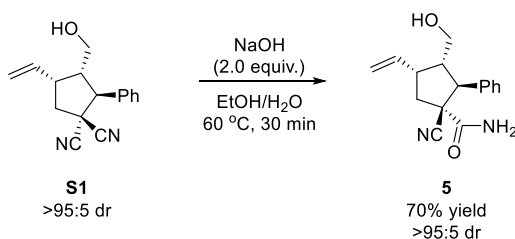

#### Procedure:

In a 10 mL round bottom flask equipped with a magnetic stirring bar, alcohol **S1** (0.3 mmol, 1.0 equiv.) was dissolved in an EtOH/ $\text{H}_2\text{O}$  (1:1) mixture (5 mL) at 60 °C. Then, NaOH (0.6 mmol, 2.0 equiv.) was added and the reaction mixture stirred at 60 °C for 30 min. Once the reaction was completed, the mixture was diluted with EtOAc (30 mL), washed with brine (2 x 25 mL), dried over  $\text{Na}_2\text{SO}_4$  concentrated *in vacuo* and then subjected to purification by FC.

Isolated in 70% yield (56.8 mg) as an off-white solid by FC on silica gel using EtOAc/pentane 1:1 as eluent.  $[\alpha]_D^{22} = +17.4$  (c 0.6,  $\text{CH}_2\text{Cl}_2$ ).  $^1\text{H NMR}$  (400 MHz,  $\text{CDCl}_3$ ):  $\delta$  7.39-7.29 (m, 5H), 6.08 (ddd,  $J = 17.1$ ; 10.0; 9.2 Hz, 1H), 5.95 (s, 1H), 5.77 (s, 1H), 5.26 (d,  $J = 17.1$  Hz, 1H), 5.20 (dd,  $J = 10.1$ ; 1.1 Hz, 1H), 3.63 (d,  $J = 11.7$  Hz, 1H), 3.58 (t,  $J = 5.4$  Hz, 2H), 3.35-3.24 (m, 1H), 2.89 (ddd,  $J = 16.1$ ; 11.2; 5.5 Hz, 1H), 2.50 (qd,  $J = 13.5$ ; 8.3 Hz, 2H), 1.64 (t,  $J = 5.7$  Hz, 1H).  $^{13}\text{C NMR}$  (100 MHz,  $\text{CDCl}_3$ ):  $\delta$  168.6, 137.8, 135.9, 128.9 (2C), 128.60 (2C),

128.58, 120.4, 117.5, 61.5, 55.9, 54.9, 48.0, 43.1, 42.4. **HRMS** (ESI+)  $m/z$  calcd. for  $C_{16}H_{18}N_2O_2$   $[M+H]^+$ : 271.1441; found: 271.1441.

#### Reductive amination/cyclization to form lactam **6**:

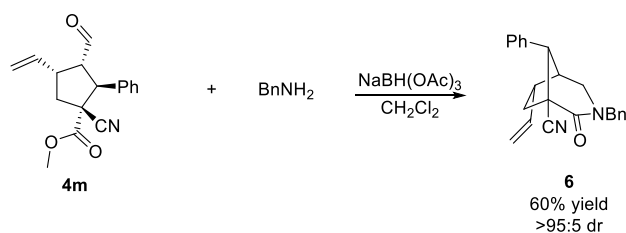

#### Procedure:

A glass vial equipped with a magnetic stirring bar was charged with aldehyde **4m** (0.10 mmol, 1.0 equiv.), benzylamine (0.15 mmol, 1.5 equiv.) and  $CH_2Cl_2$  (0.4 mL). Sodium triacetoxyborohydride (0.16 mmol, 1.6 equiv.) was then added. The mixture was stirred for 16 h at ambient temperature. The crude product was then loaded directly onto the column. FC on silica gel yielded product **6**.

Isolated in 60% yield (20.5 mg) as a pale grey oil by FC on silica using EtOAc/pentane 1:5 as eluent.  $[\alpha]_D^{22} = -36.0$  (c 0.2,  $CH_2Cl_2$ ).  **$^1H$  NMR (400 MHz,  $CDCl_3$ )**:  $\delta$  7.42–7.28 (m, 10H), 5.35 (ddd,  $J = 17.0$ ; 10.2; 7.8 Hz, 1H), 5.01 (d,  $J = 17.0$  Hz, 1H), 4.99 (d,  $J = 10.2$  Hz, 1H), 4.67 (d,  $J = 14.1$  Hz, 1H), 4.45 (d,  $J = 14.1$  Hz, 1H), 3.70 (s, 1H), 3.33–3.16 (m, 3H), 2.78–2.61 (m, 2H), 2.31 (dd,  $J = 14.4$ ; 5.7 Hz, 1H).  **$^{13}C$  NMR (100 MHz,  $CDCl_3$ )**:  $\delta$  167.6, 137.0, 136.3, 136.1, 129.1 (2C), 129.0 (2C), 128.9 (2C), 128.2, 128.0, 127.7 (2C), 118.0, 117.8, 53.3, 51.3, 50.2, 48.9, 45.4, 41.8, 40.5. **HRMS** (ESI+)  $m/z$  calcd. for  $C_{23}H_{22}N_2O$   $[M+H]^+$ : 343.1805; found: 343.1806.

#### Iodoetherification to form **7**:

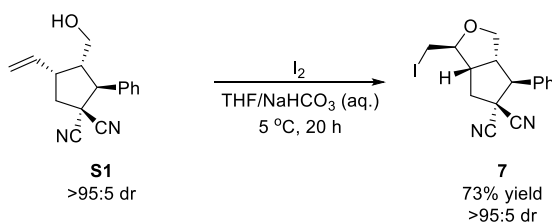

#### Procedure:

Alcohol **S1** (0.20 mmol, 1.0 equiv.) was dissolved in a THF/ $NaHCO_3$  (sat. aq.) (3:1) mixture (1.6 mL) in a glass vial equipped with a magnetic stirring bar and cooled to 5 °C. Iodine was then added 0.5 equiv. at the time every hour until a total amount of 3.0 equiv. had been added. The mixture was kept at 5 °C and stirred overnight. The reaction mixture was then quenched with  $H_2O$  and extracted with EtOAc (x 3). The organic phase was washed with  $Na_2S_2O_3$  (sat. aq.),  $H_2O$  and brine. The organic phase was dried over  $Na_2SO_4$ , concentrated *in vacuo* and then subjected to purification by FC.

Isolated in 73% yield (55.2 mg) as a white crystalline solid by FC on silica using EtOAc/pentane 1:10 as eluent.  $[\alpha]_D^{22} = +48.0$  (c 0.2,  $CH_2Cl_2$ ).  **$^1H$  NMR (400 MHz,  $CDCl_3$ )**:  $\delta$  7.50–7.40 (m, 5H), 4.17 (ddd,  $J = 8.5$ ; 5.4; 2.8 Hz, 1H), 3.99 (dd,  $J = 9.9$ ; 5.8 Hz, 1H), 3.73 (dd,  $J = 9.9$ ; 1.9 Hz, 1H), 3.50–3.36 (m, 2H), 3.25 (d,  $J = 10.0$ ; 5.4 Hz, 1H), 3.20–3.04 (m, 3H), 2.42–2.32 (m, 1H).  **$^{13}C$  NMR (100 MHz,  $CDCl_3$ )**:  $\delta$  132.7, 129.7, 129.4 (2C), 128.6 (2C), 114.4, 114.3, 86.1, 70.5, 59.7, 48.7, 47.5, 44.4, 44.2, 6.8. **HRMS** (ESI+)  $m/z$  calcd. for  $C_{16}H_{15}N_2OI$   $[M+Na]^+$ : 401.0121; found: 401.0125.

## 5. Determination of the absolute and relative configuration in products

### Determination of absolute configuration in products 4:

Compounds **4a,m,n,o** are described in the literature and our characterization data for these compounds were in agreement with those previously reported.<sup>3</sup> Absolute configuration was assigned based on comparison of measured values for optical rotation for **4a,n** as shown below. The absolute stereochemistry of the remaining products **4** was assigned by analogy.

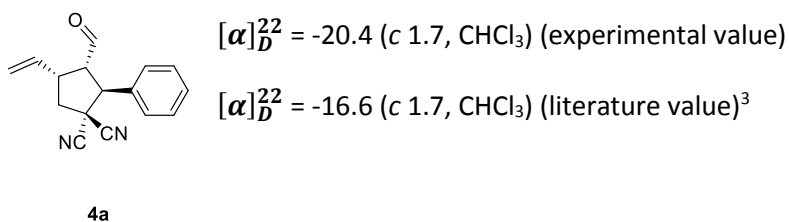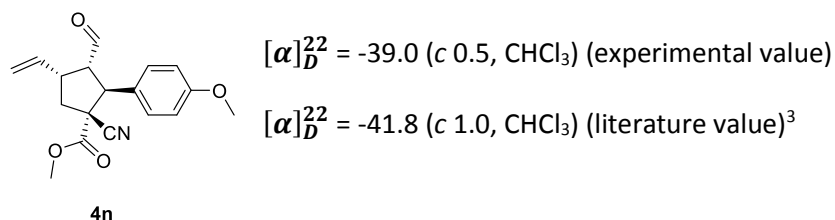

### Determination of relative configuration in product 5:

Colorless single crystals were obtained from a recrystallized sample of **5** with a minimum amount of chloroform. Stereochemical configuration of the newly formed stereocenter in **5** was determined by X-ray crystallography analysis. X-ray crystal structure of **5** (Figure S1) shows that primary amide moiety is positioned *syn* with respect to the allylic moiety and allows for determination of the relative stereochemical configuration at the center in question.

<sup>3</sup> Ma, G.; Afewerki, S.; Deiana, L.; Palo-Nieto, C.; Liu, L.; Sun, J.; Ibrahim, I.; Córdova, A. *Angew. Chem. Int. Ed.* **2013**, *52*, 6050.

Figure S1. Ortep diagram of compound 5 (with thermal ellipsoids drawn at 50% probability).

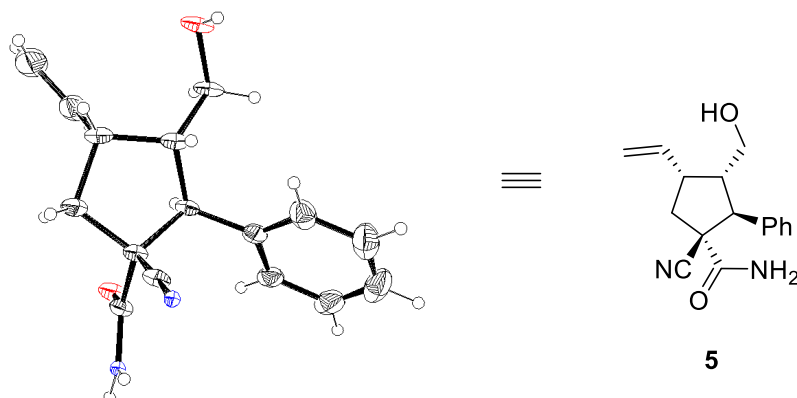

Table S1. Crystal data and refinement details for compound 5.

| Item                                       | Value                                                         |
|--------------------------------------------|---------------------------------------------------------------|
| Molecular formula                          | C <sub>16</sub> H <sub>18</sub> N <sub>2</sub> O <sub>2</sub> |
| Formula weight                             | 270.33                                                        |
| Crystal system                             | monoclinic                                                    |
| Space Group                                | P 1 2 1                                                       |
| a (Å)                                      | 8.94706                                                       |
| b (Å)                                      | 11.2291                                                       |
| c (Å)                                      | 14.9983                                                       |
| α (°)                                      | 90                                                            |
| β (°)                                      | 102.552                                                       |
| γ (°)                                      | 90                                                            |
| Volume (Å <sup>3</sup> )                   | 1470.82                                                       |
| Z                                          | 4                                                             |
| T (K)                                      | 100                                                           |
| ρ (g cm <sup>-3</sup> )                    | 1.2207                                                        |
| λ (Å)                                      | 0.71073                                                       |
| μ (mm <sup>-1</sup> )                      | 0.081                                                         |
| # measured refl                            | 16869                                                         |
| # unique refl                              | 6730                                                          |
| R <sub>int</sub>                           | 0.0401                                                        |
| # parameters                               | 378                                                           |
| R(F <sup>2</sup> ), all refl               | 0.067                                                         |
| R <sub>w</sub> (F <sup>2</sup> ), all refl | 0.1187                                                        |
| Goodness of fit                            | 1.051                                                         |

Crystal data for [5]: C<sub>16</sub>H<sub>18</sub>N<sub>2</sub>O<sub>2</sub>, *M* = 270.33, monoclinic, Space group P 1 2 1 (no. 3), *a* = 8.94706(18) Å, *b* = 11.2291(3) Å, *c* = 14.9983(3) Å, *θ* = 102.552(2)°, Flack parameter = 8.38, *V* = 1470.82(6) Å<sup>3</sup>, *T* = 100 K, *Z* = 4, *d<sub>c</sub>* = 1.2207 g cm<sup>-3</sup>, μ(Mo Kα, λ = 0.71073 Å) = 0.081 mm<sup>-1</sup>, 16869 reflections collected, 6730 unique [*R*<sub>int</sub> = 0.0401], which were used in all calculations. Refinement on *F*<sup>2</sup>, final *R*(*F*) = 0.067, *R<sub>w</sub>*(*F*<sup>2</sup>) = 0.1187. CCDC number 1458670.

### Determination of relative configuration in product 7:

The stereochemical configuration of the newly formed stereocenter in **7** was determined by detailed NMR analysis. First, all hydrogen signals were assigned based on COSY NMR analysis. Subsequently, NOESY NMR analysis revealed the relative configuration of the new stereocenter as shown below.

Figure S2. 1D  $^1\text{H}$  NMR of **7** (zoom of relevant region) with assignment of signals. Assignment was made with the aid of COSY (Figure S3) and NOESY (Figure S4) spectra.

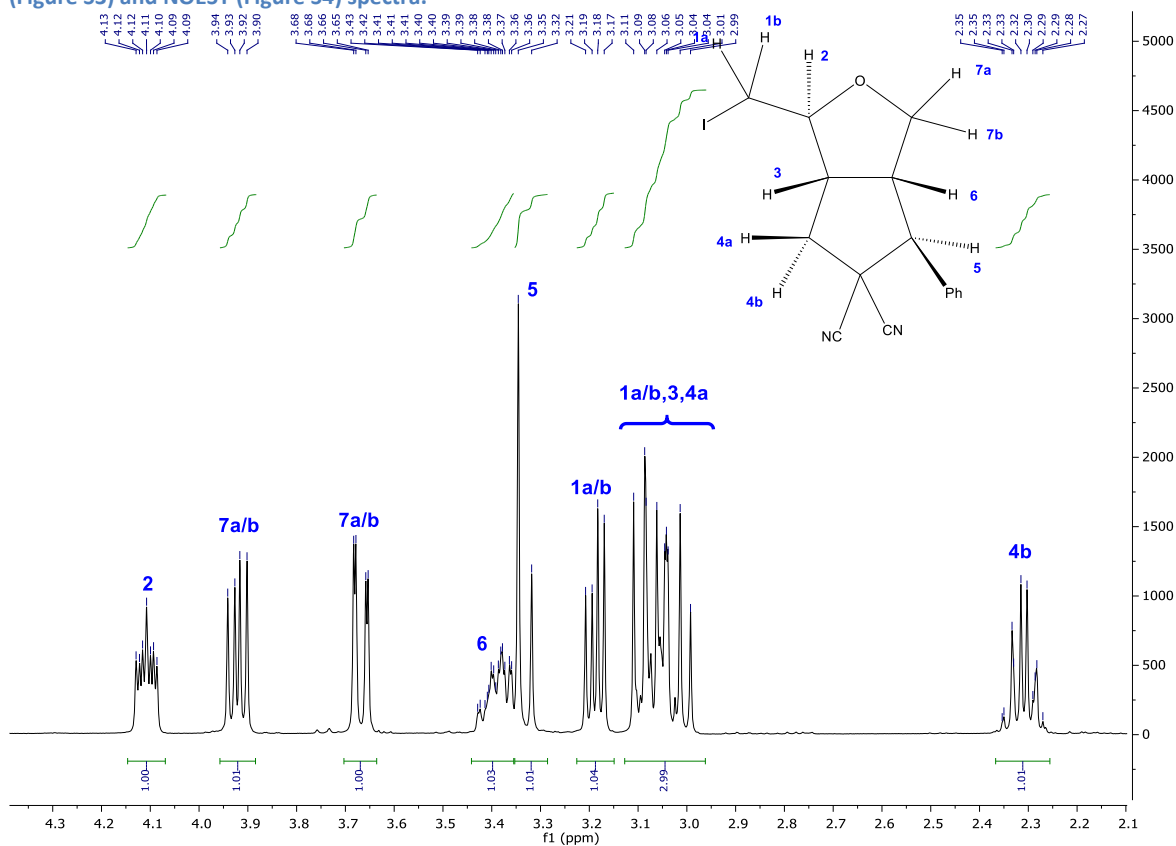

Figure S3. COSY spectrum of 7 (zoom of relevant region).

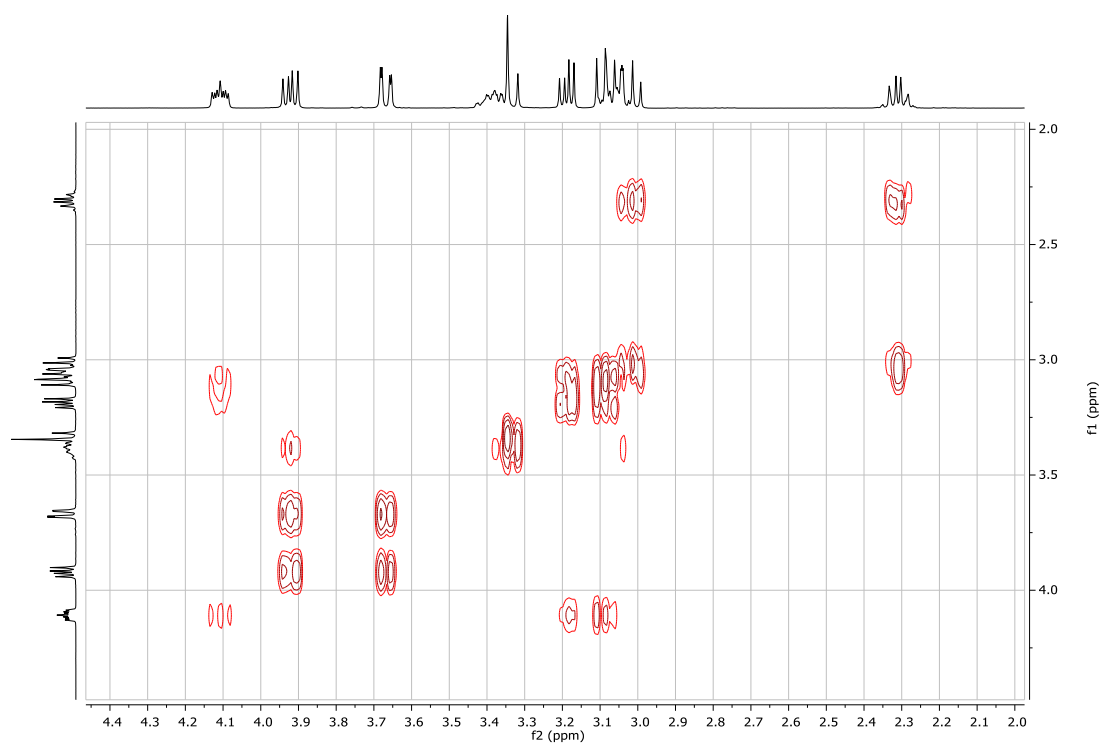

Figure S4. NOESY spectrum of 7 (zoom of relevant region). Relevant couplings marked with green circles.

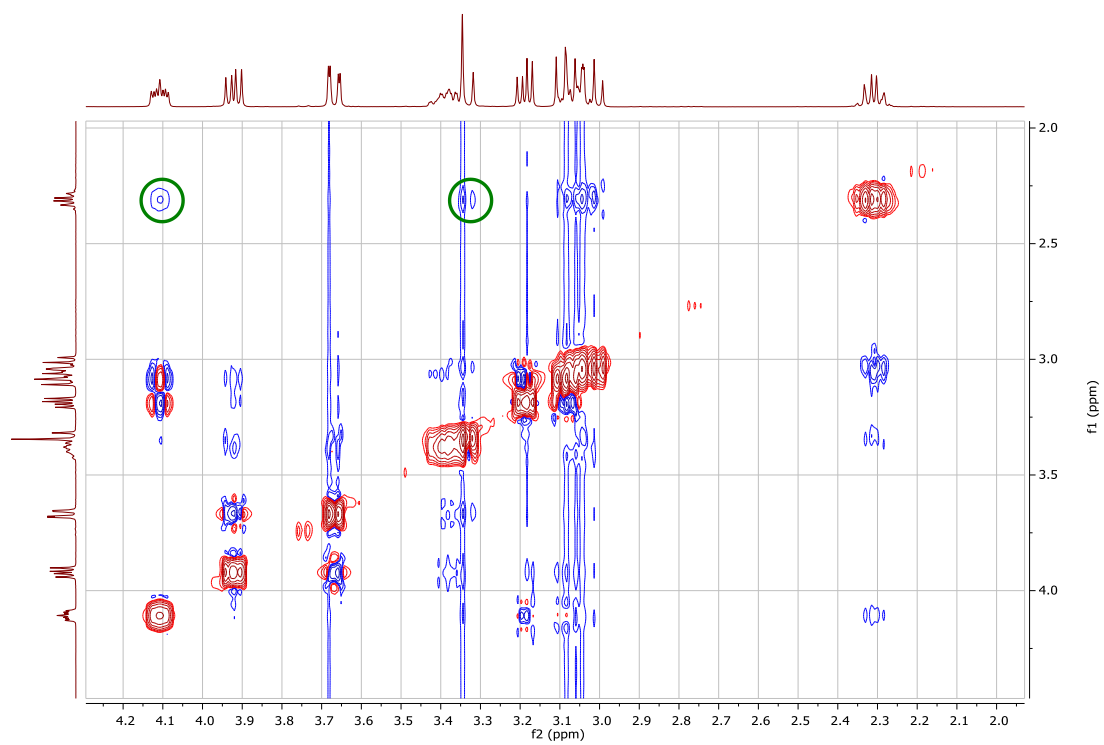

Figure S5. Overview of relevant cross-peaks observed in NOESY spectrum.

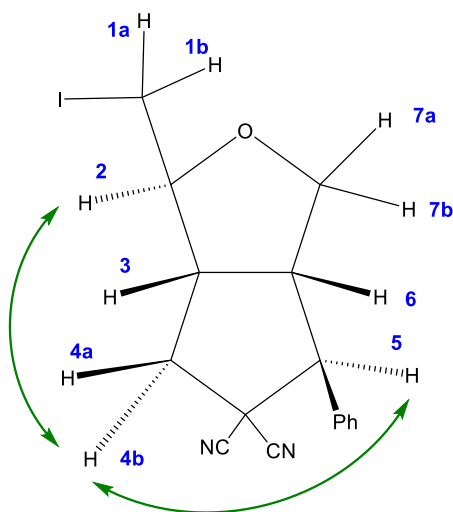

The spectra were interpreted as follows: From analysis of the 1D  $^1\text{H}$  NMR and COSY spectra, hydrogen signals could be assigned. Notably, the signal at  $\sim 2.3$  ppm must originate from one of the diastereotopic protons **4a** or **4b**. This signal was assigned to arise from **4b** from the NOESY spectrum since a correlation to proton **5** can be detected. The correlation between **4b** and **2** allow for determination of the stereochemical configuration at the center in question.

**1c**

Chemical structure of **1c**: C=C1CC1(C#N)C(=O)OCC1=CC=CC=C1

<sup>1</sup>H NMR spectrum (CDCl<sub>3</sub>) of compound **1c**. The x-axis represents the chemical shift in ppm (f1), ranging from 0.0 to 13.0. The y-axis represents the intensity, ranging from -1000 to 13000. The spectrum shows several peaks, with integration values indicated below the baseline.

Chemical shifts (ppm) listed at the top of the spectrum:

- 7.41, 7.40, 7.40, 7.39, 7.38, 7.37, 5.69, 5.67, 5.66, 5.65, 5.64, 5.63, 5.62, 5.60, 5.46, 5.45, 5.44, 5.40, 5.39, 5.37, 5.28, 5.25, 5.24, 5.23, 2.65, 2.63, 2.62, 2.58, 2.56, 2.55, 2.01, 2.00, 1.98, 1.96, 1.94, 1.93, 1.92, 1.91, 1.90, 1.69, 1.68, 1.67, 1.66

Integration values (from left to right): 4.98, 1.00, 1.82, 2.32, 1.01, 1.31, 0.71.

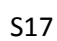

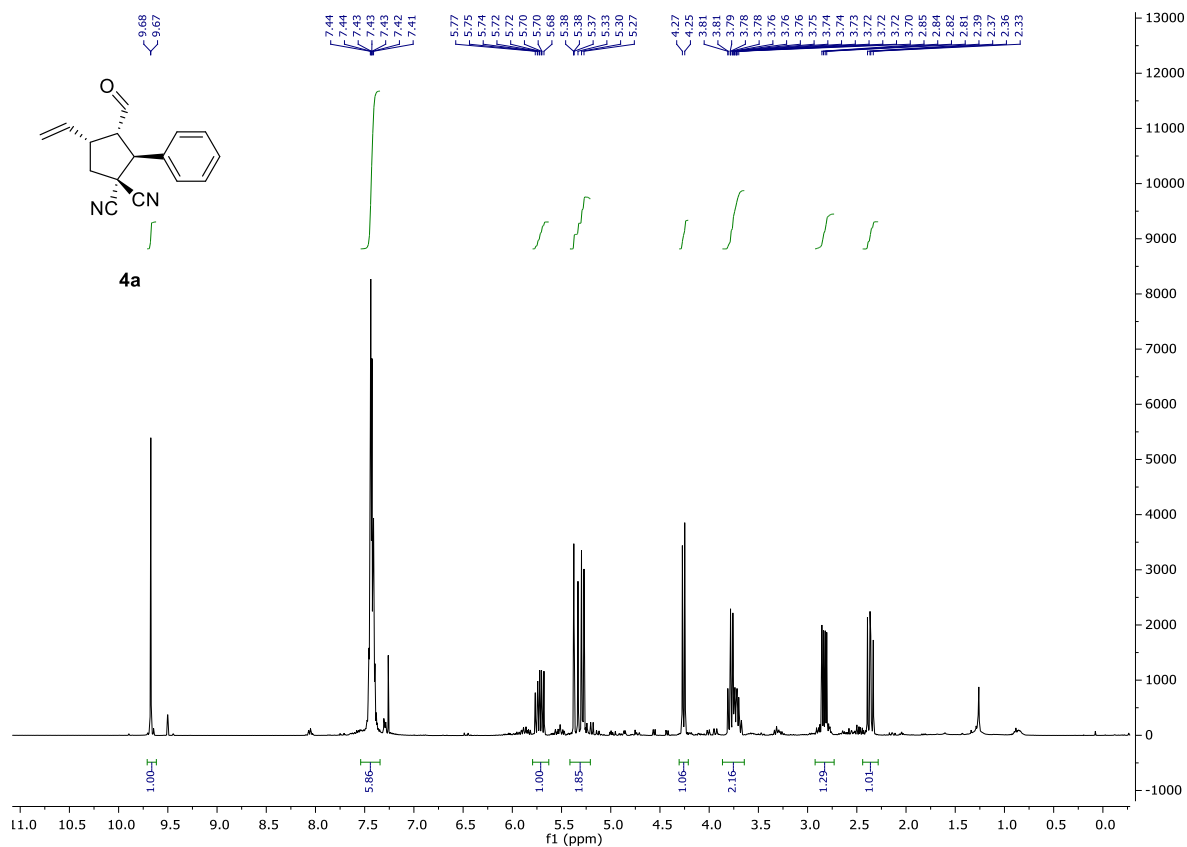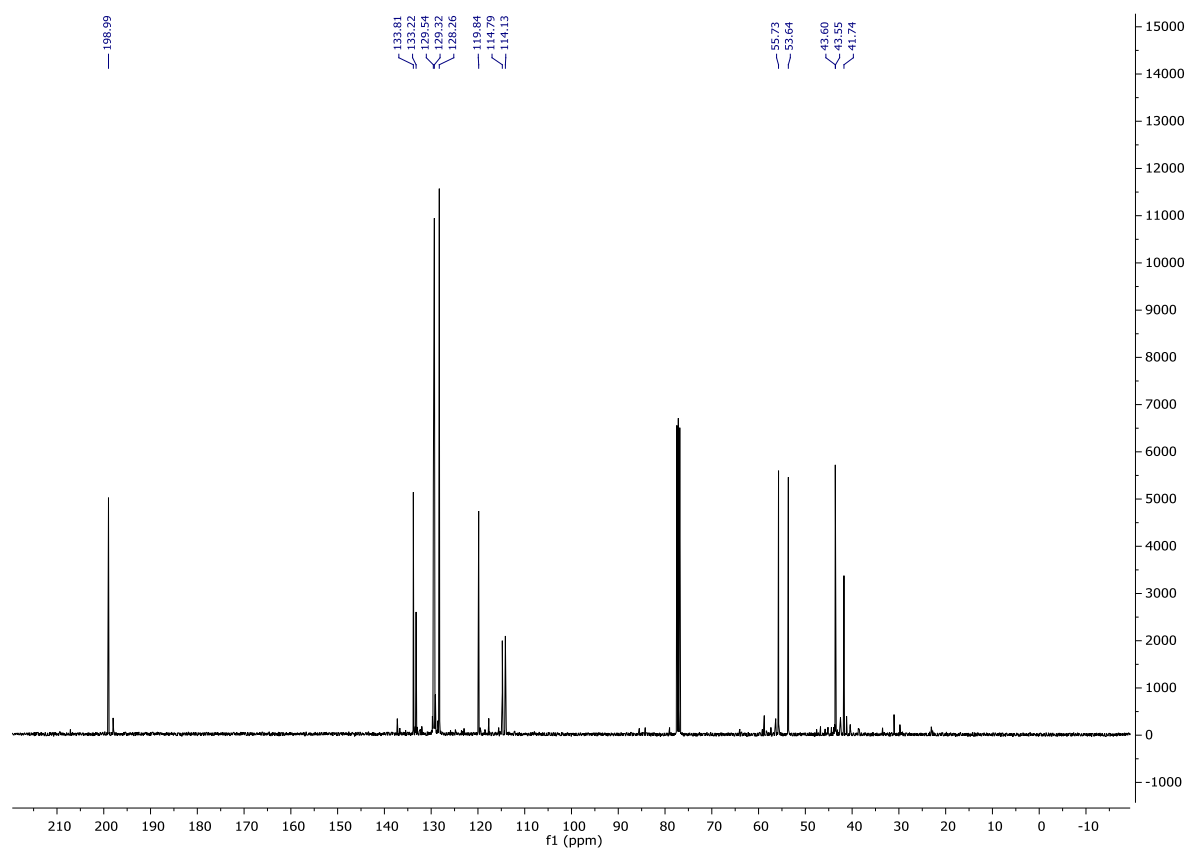

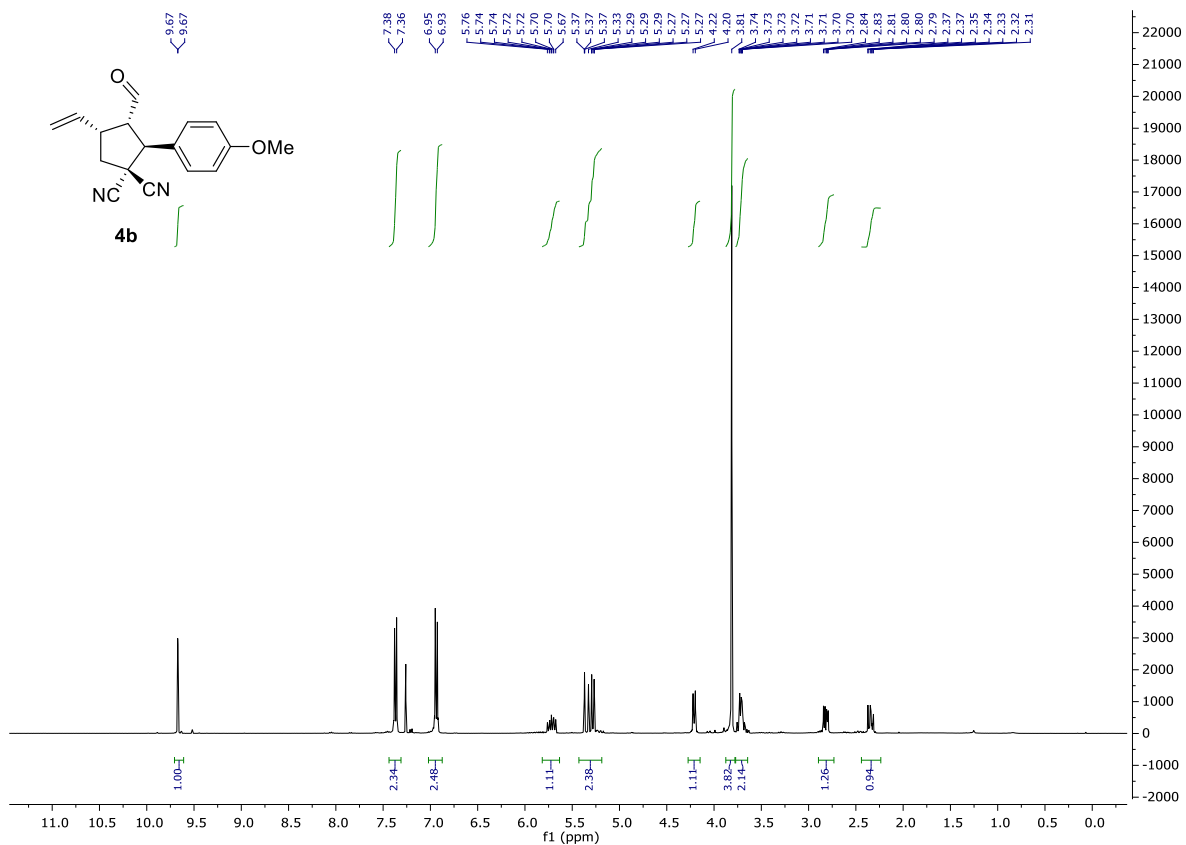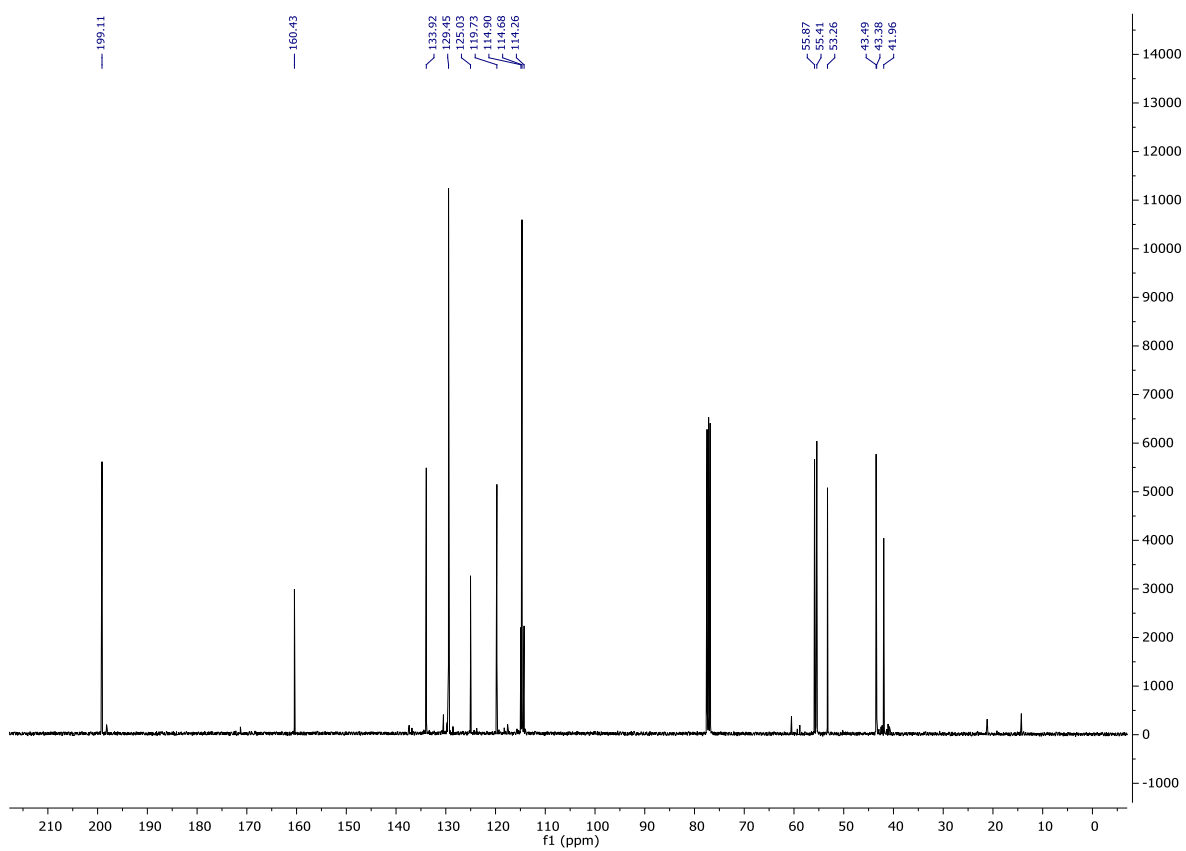

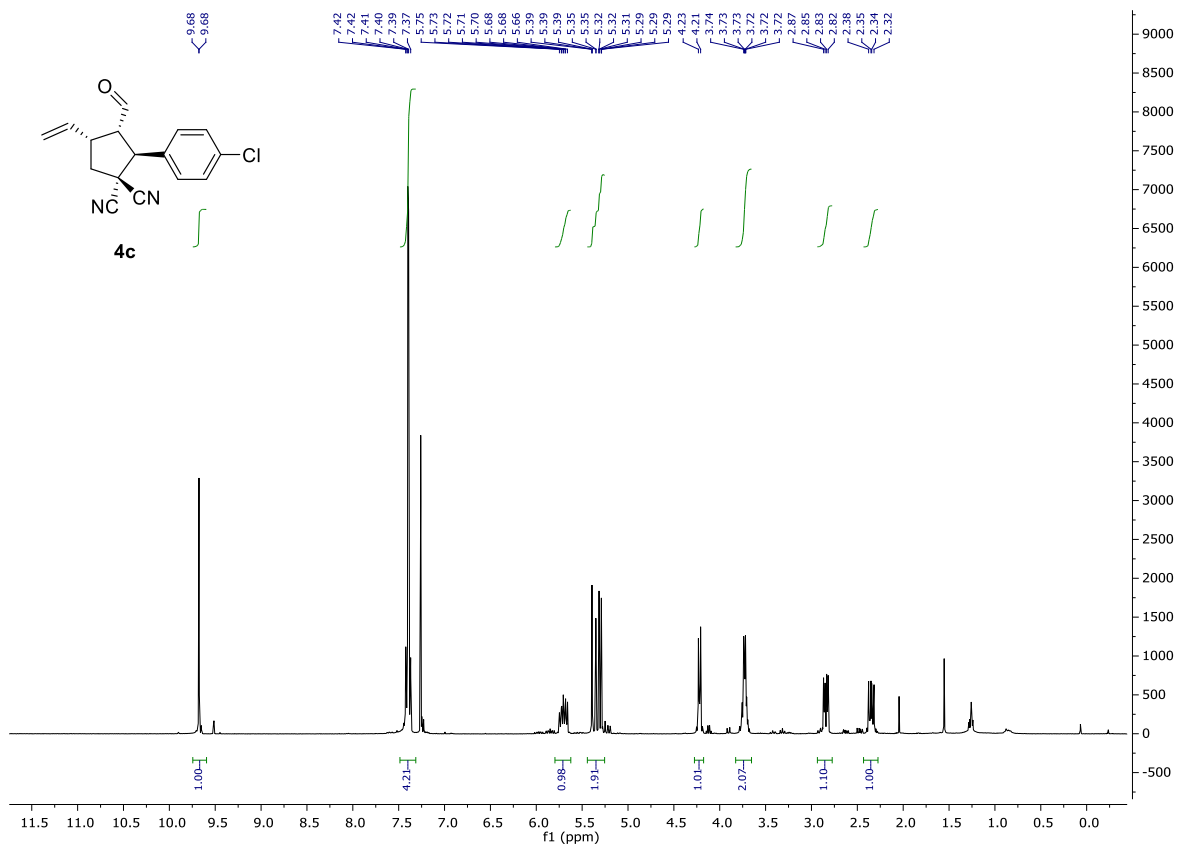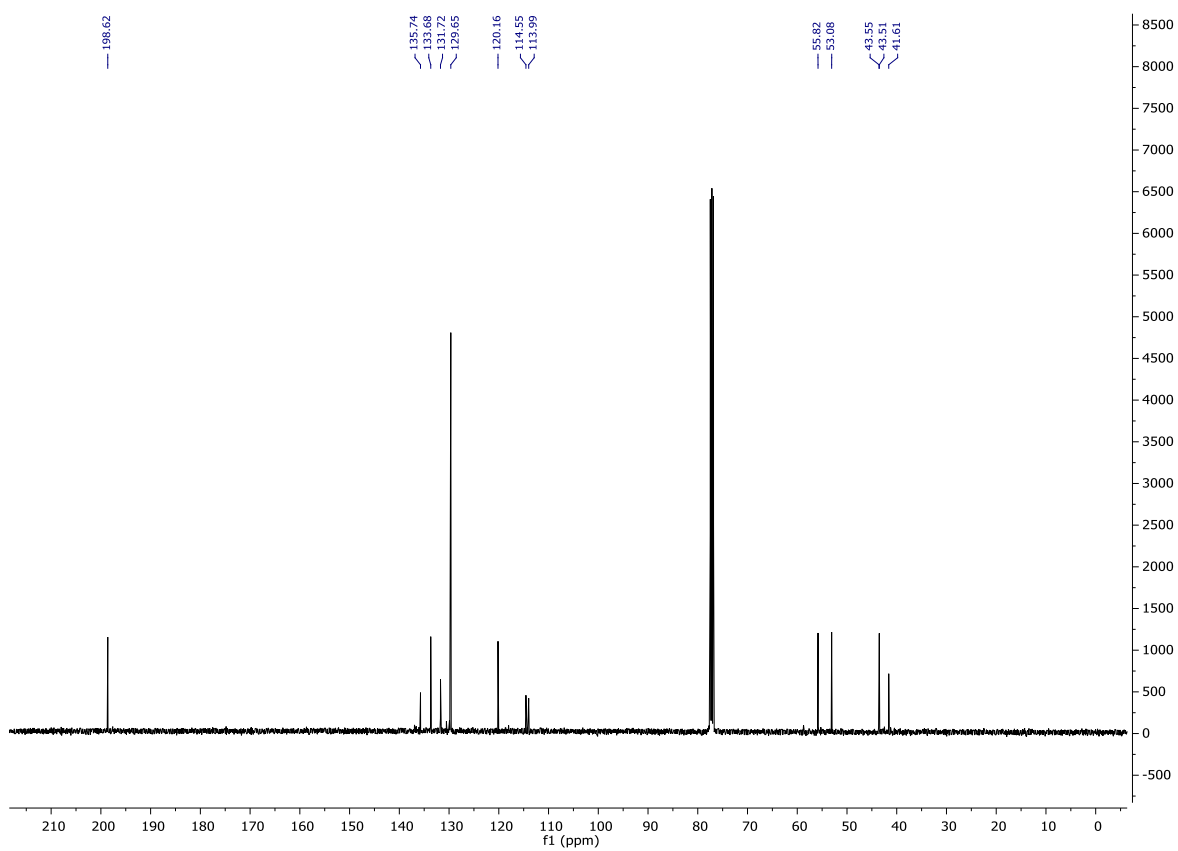

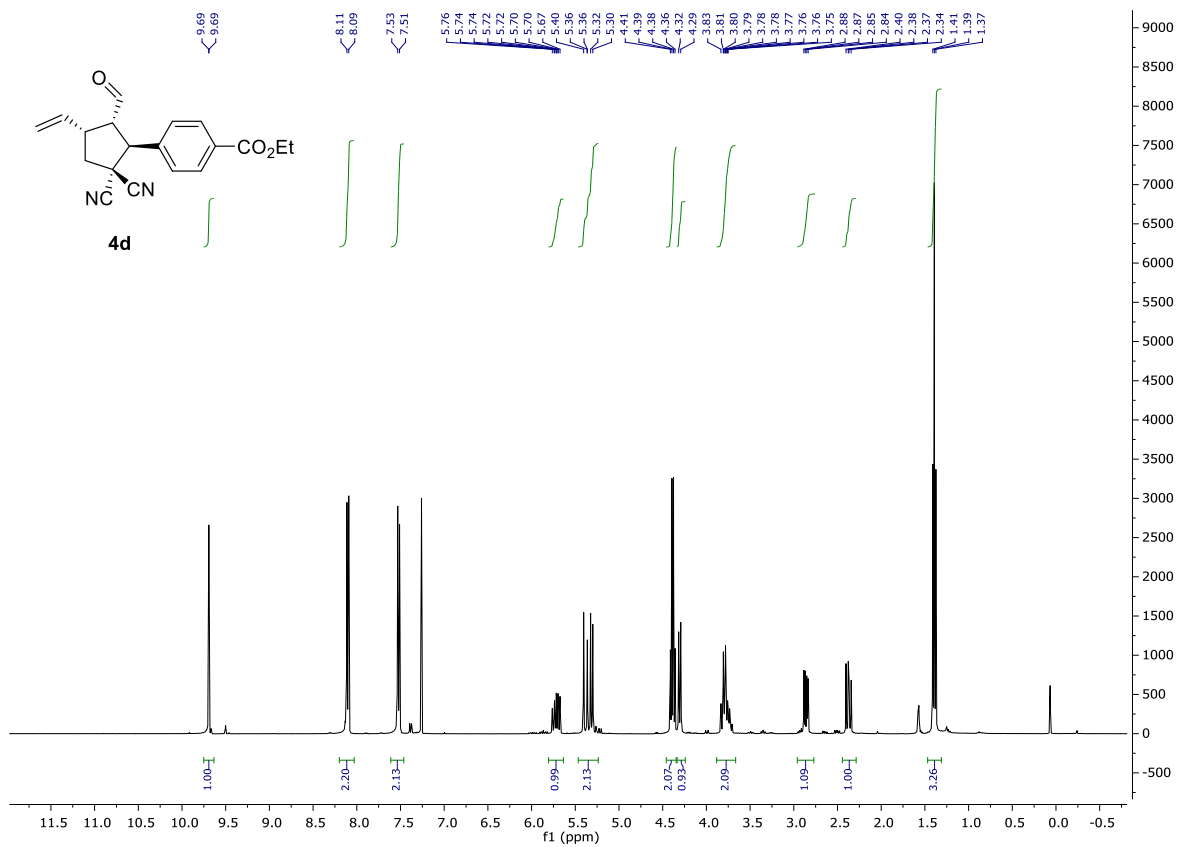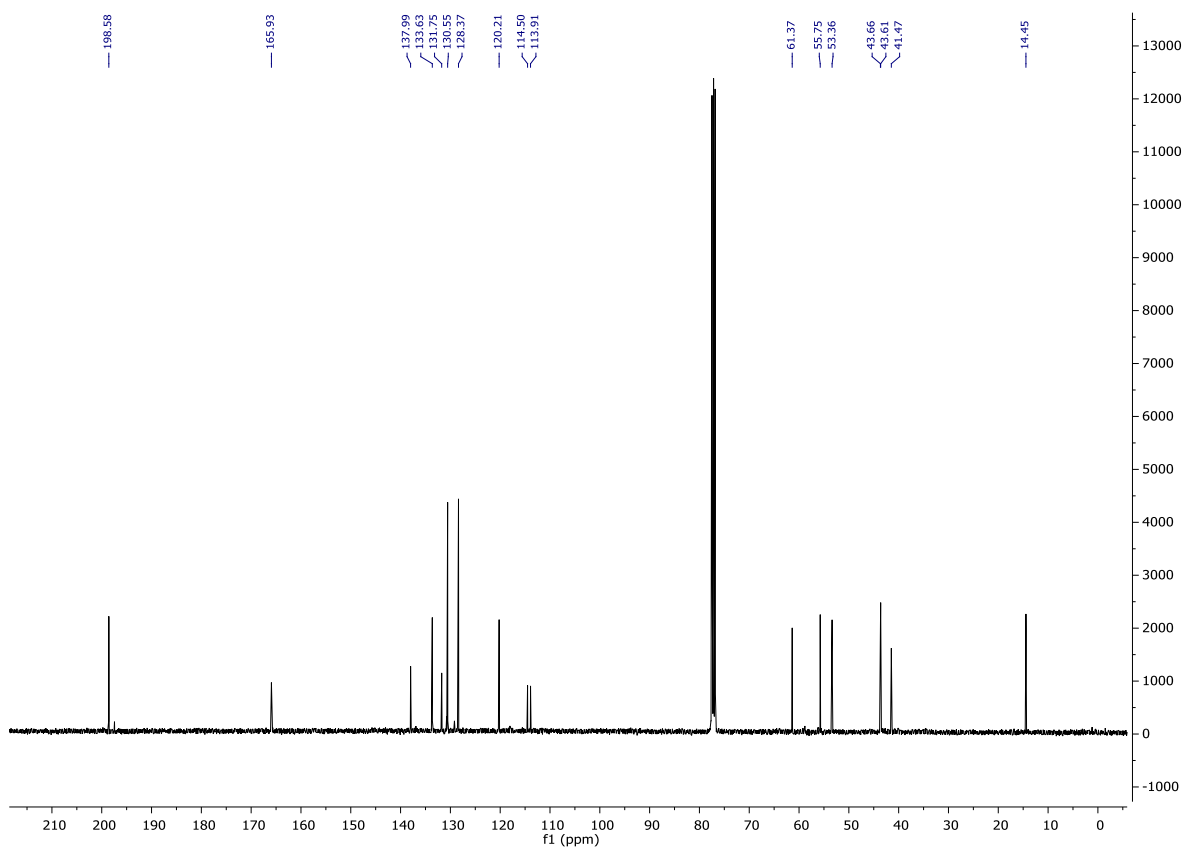

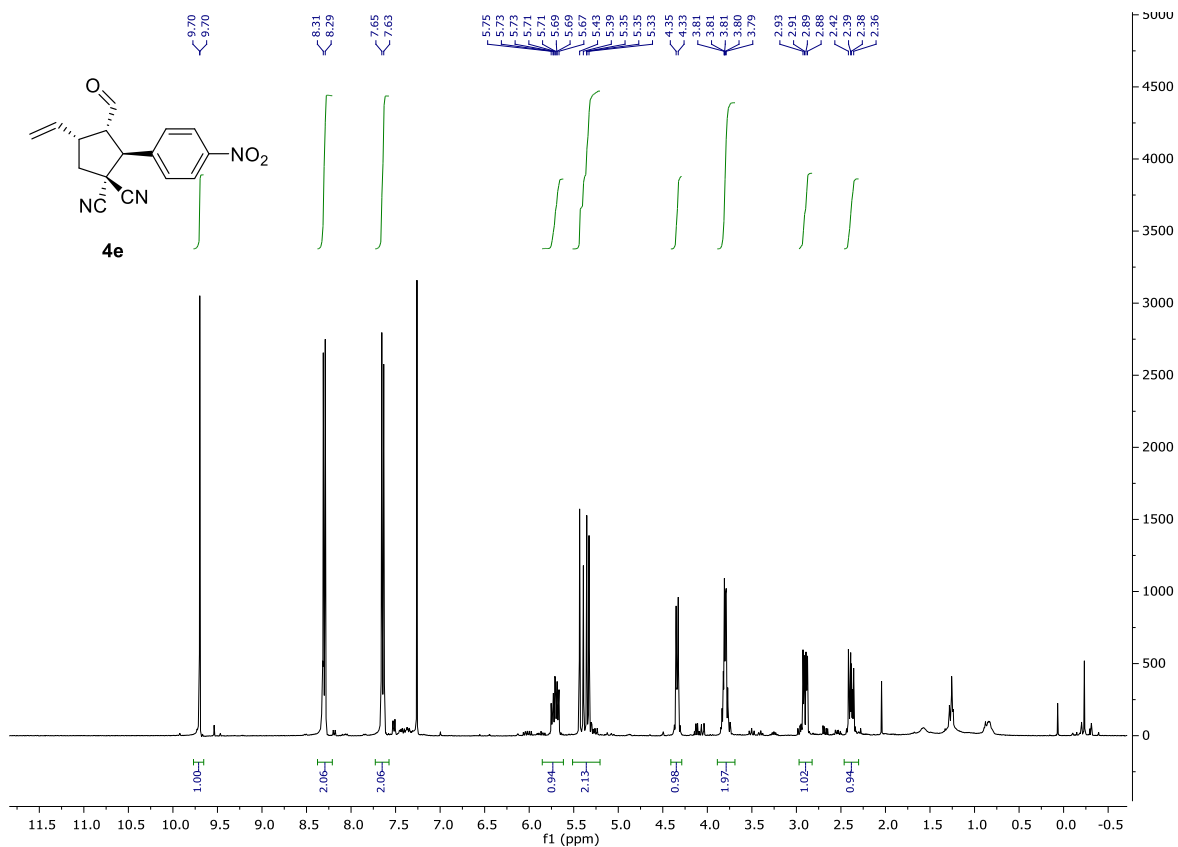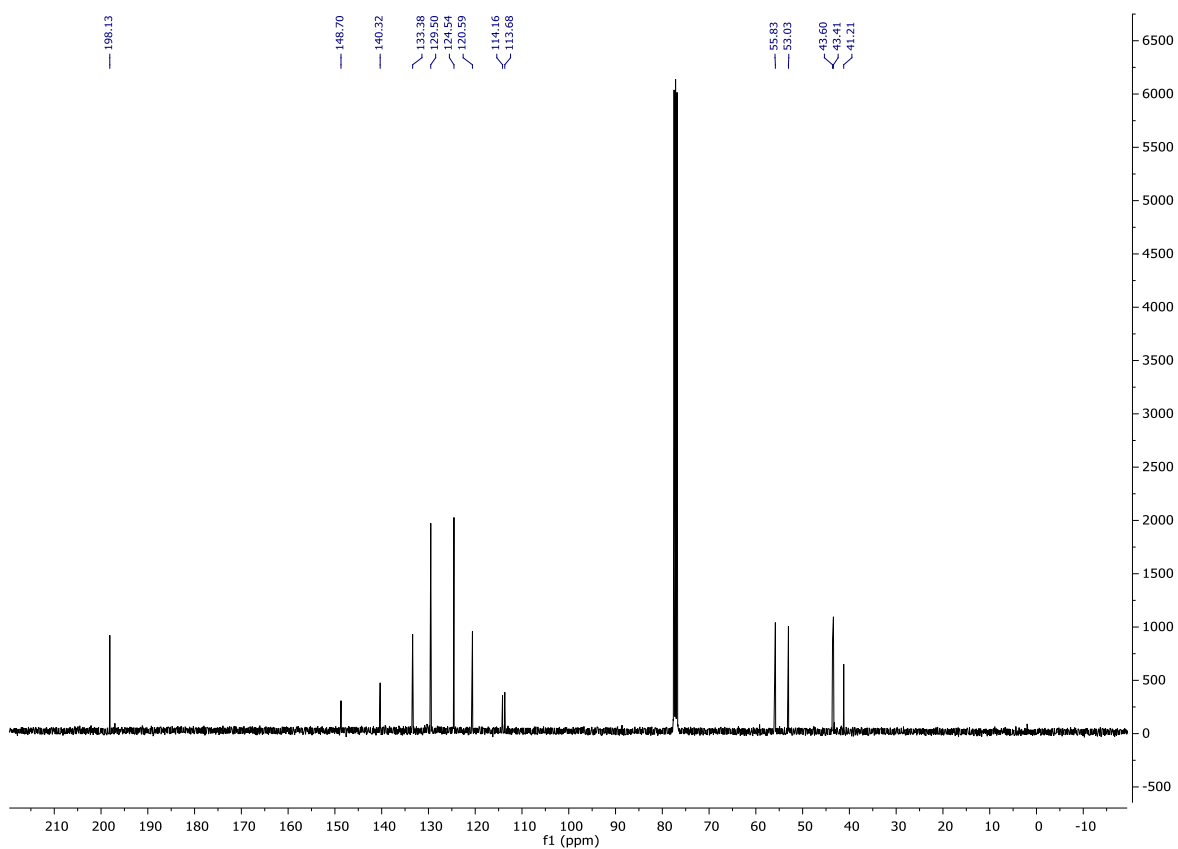

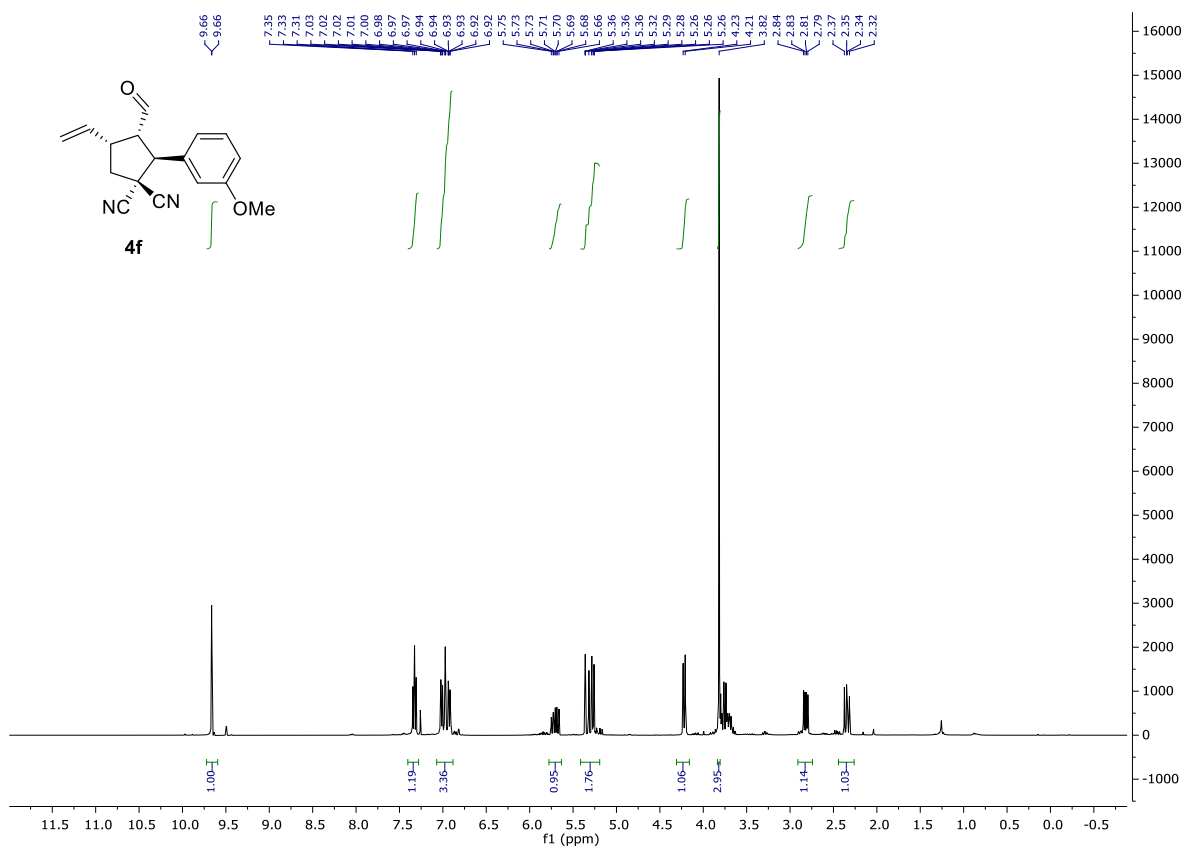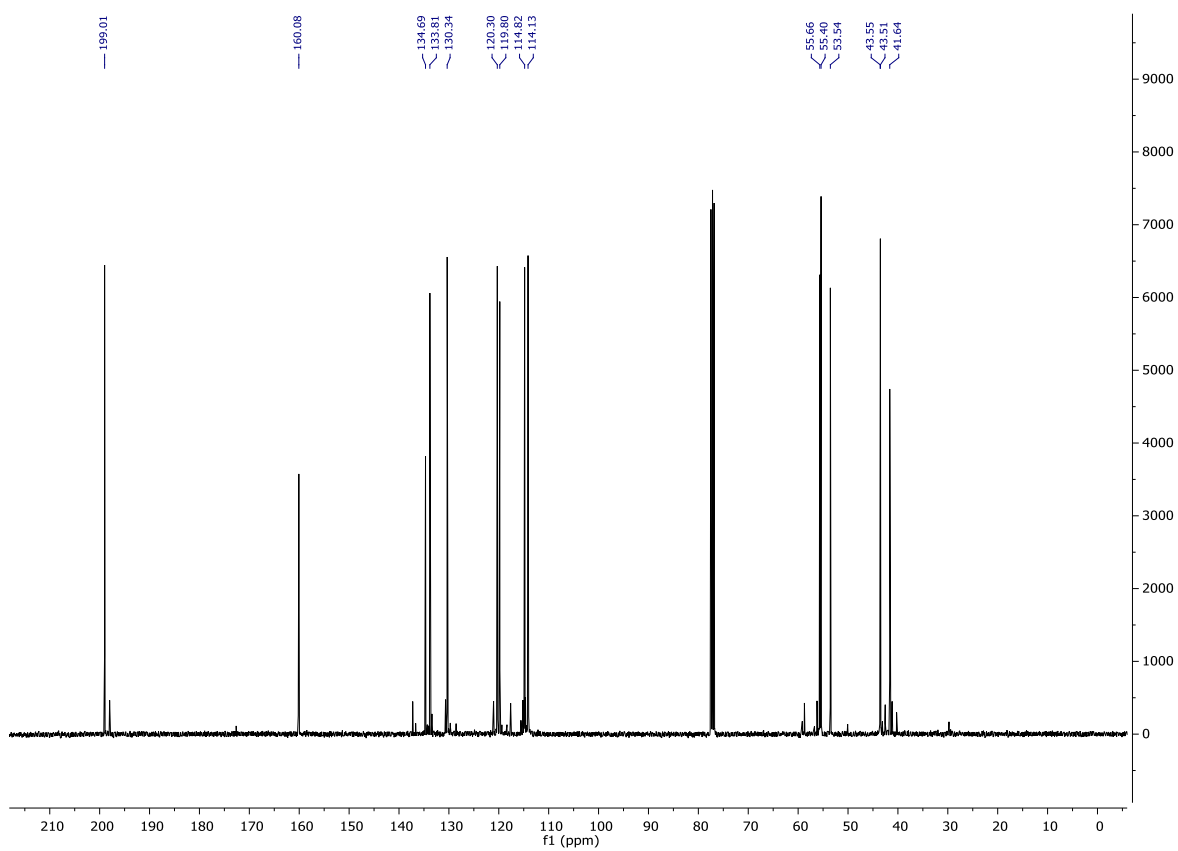

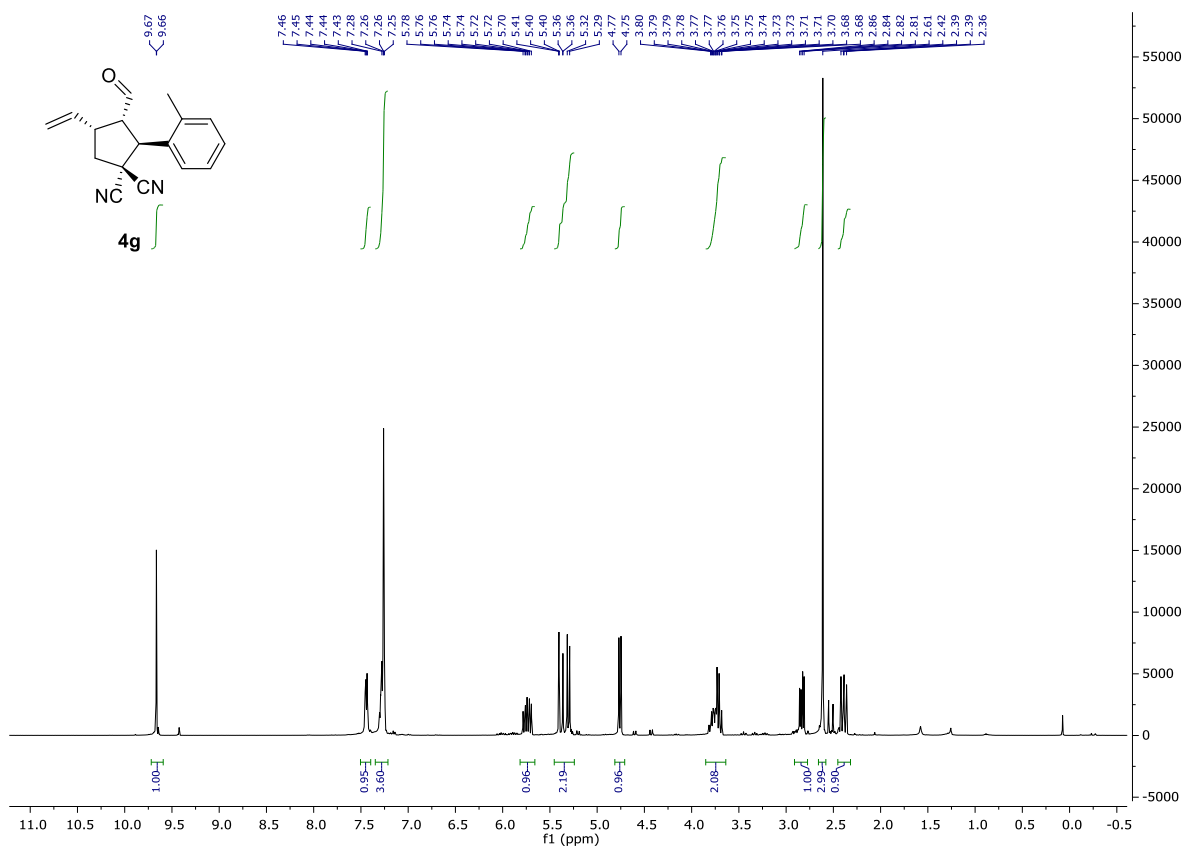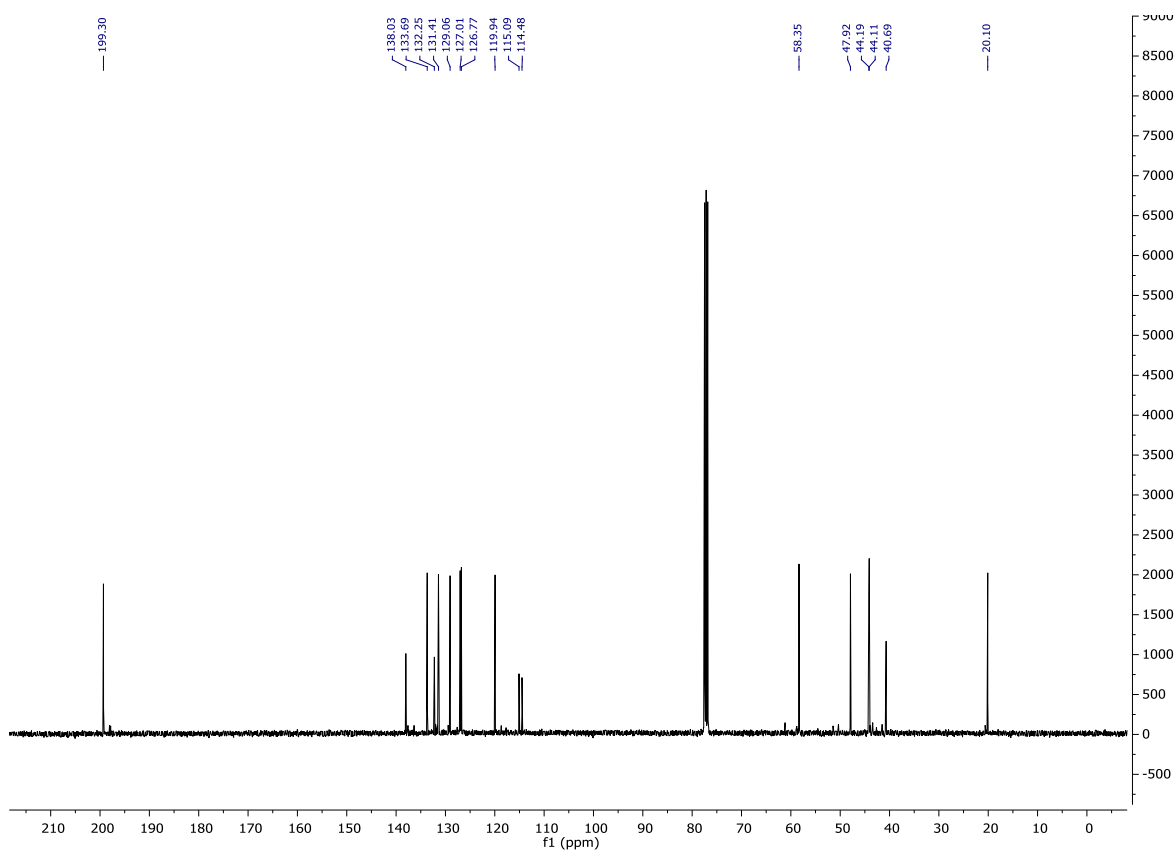



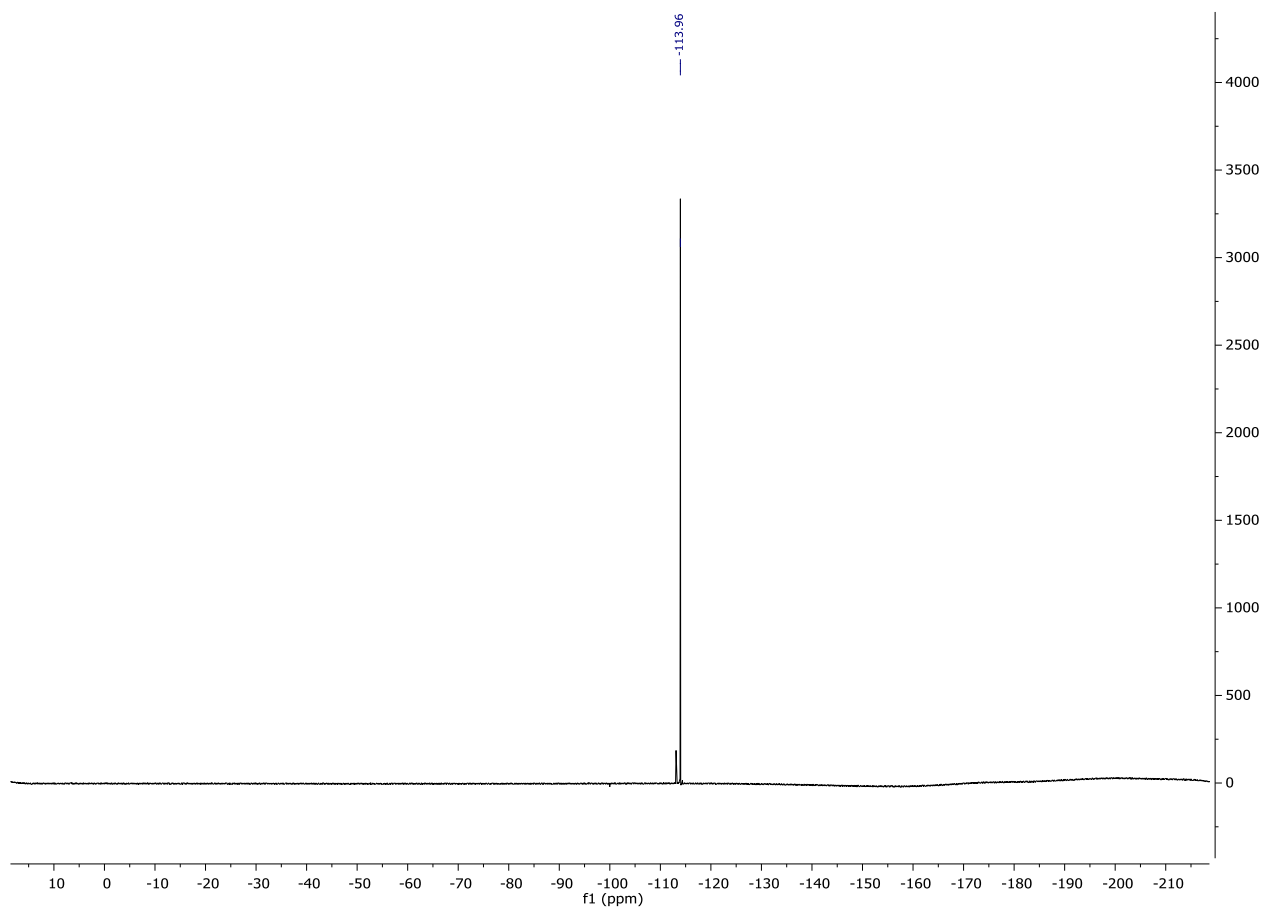

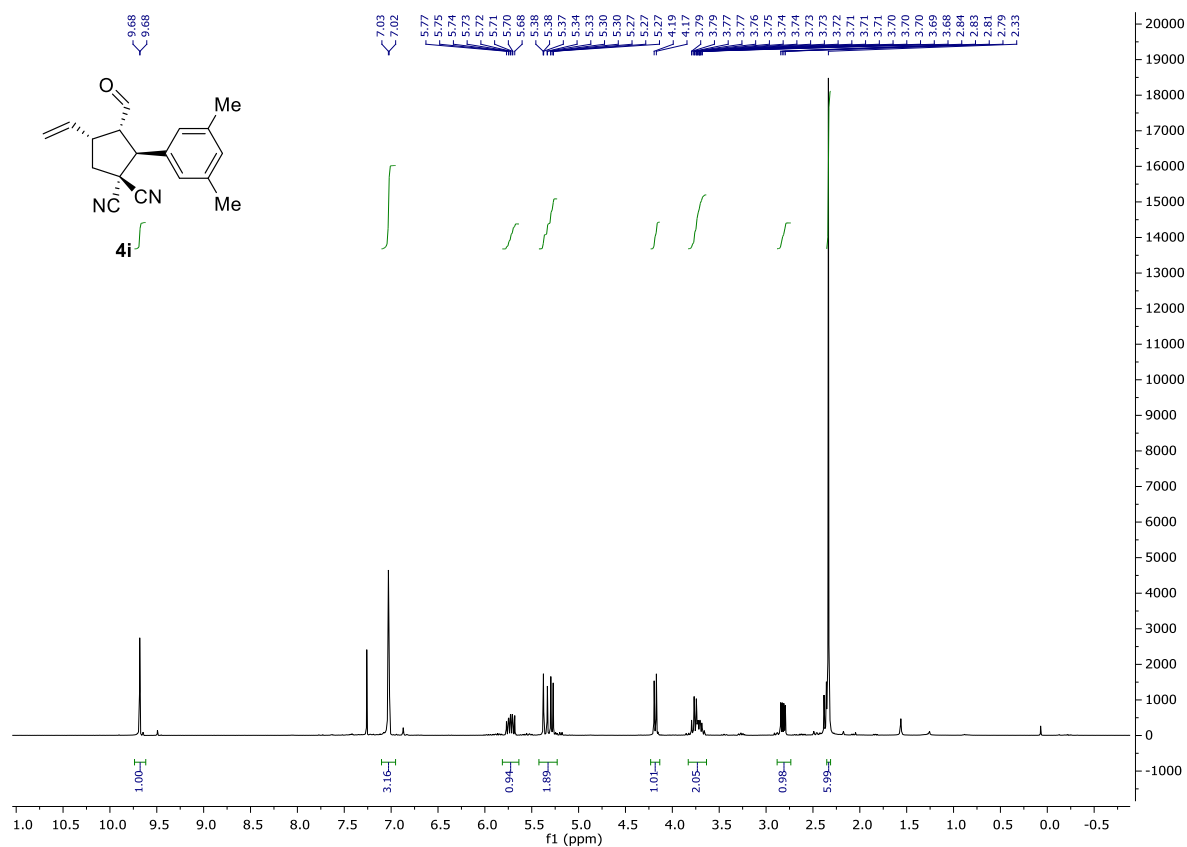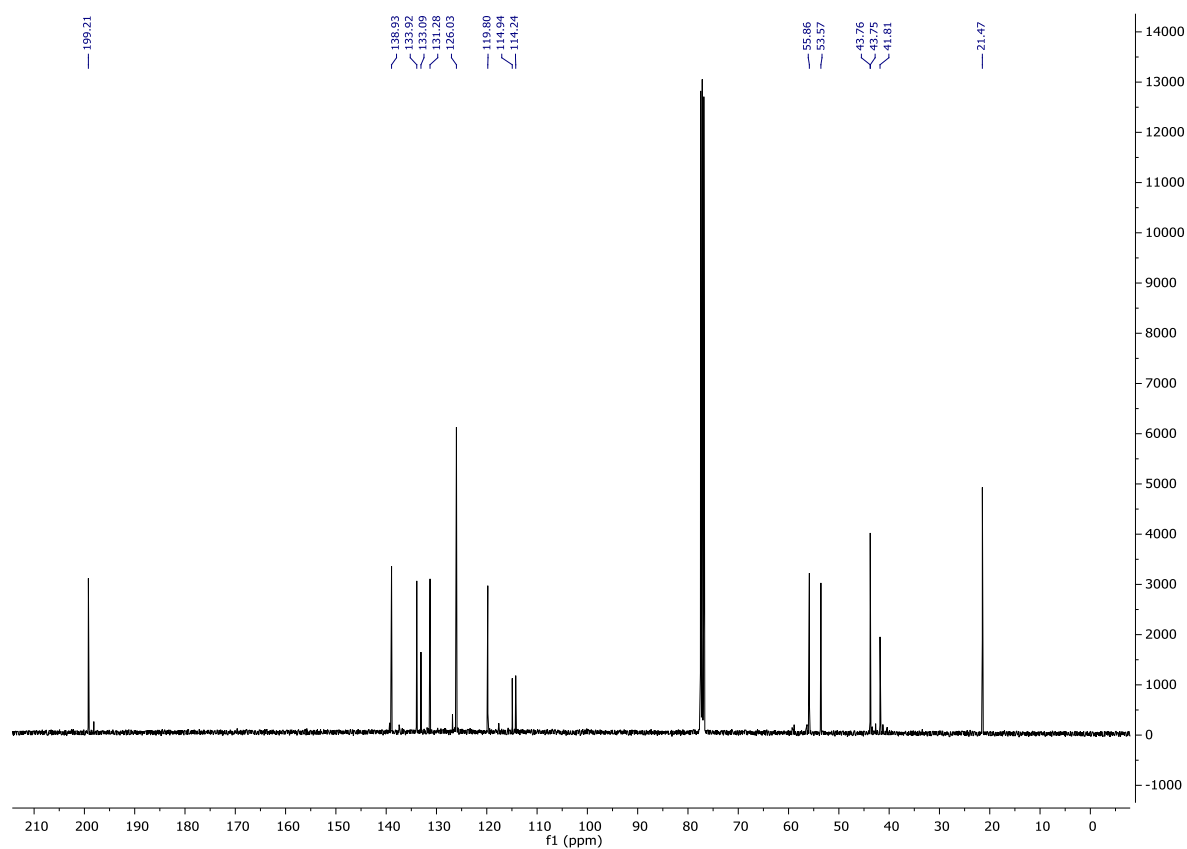

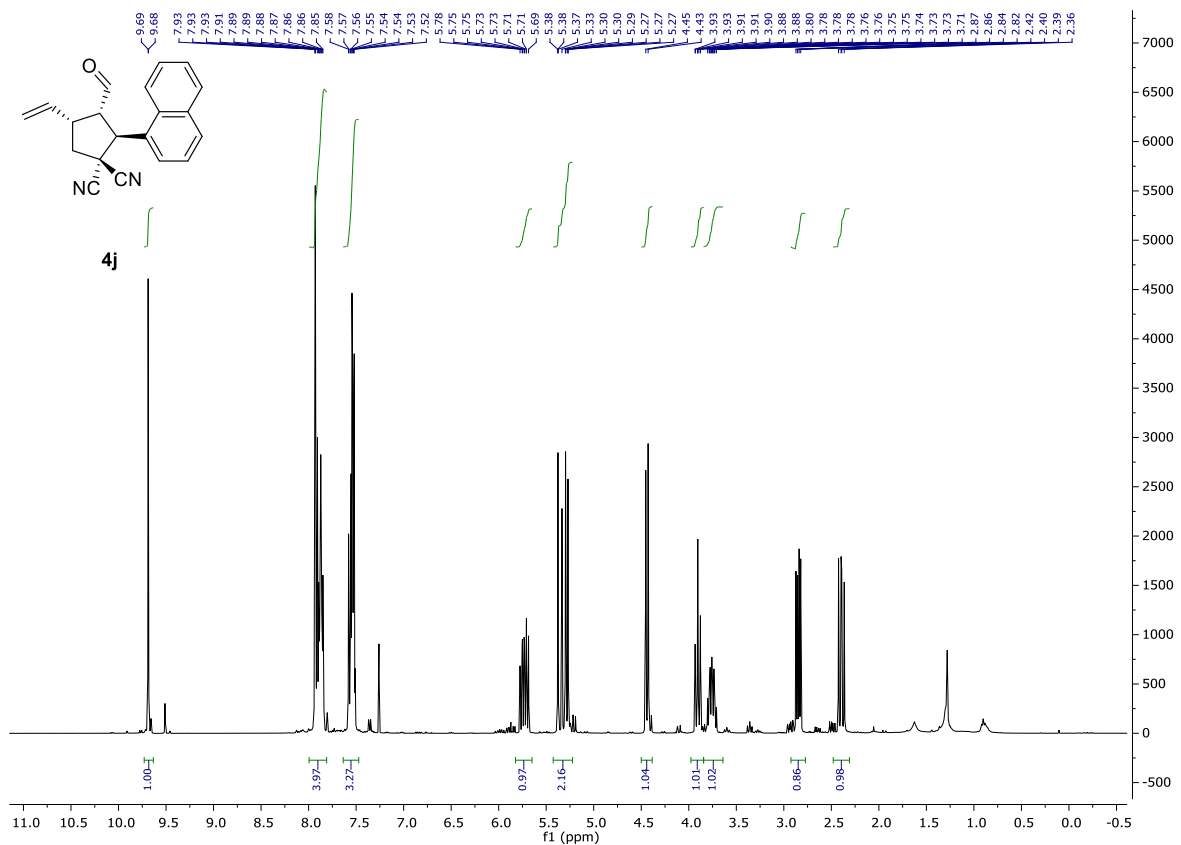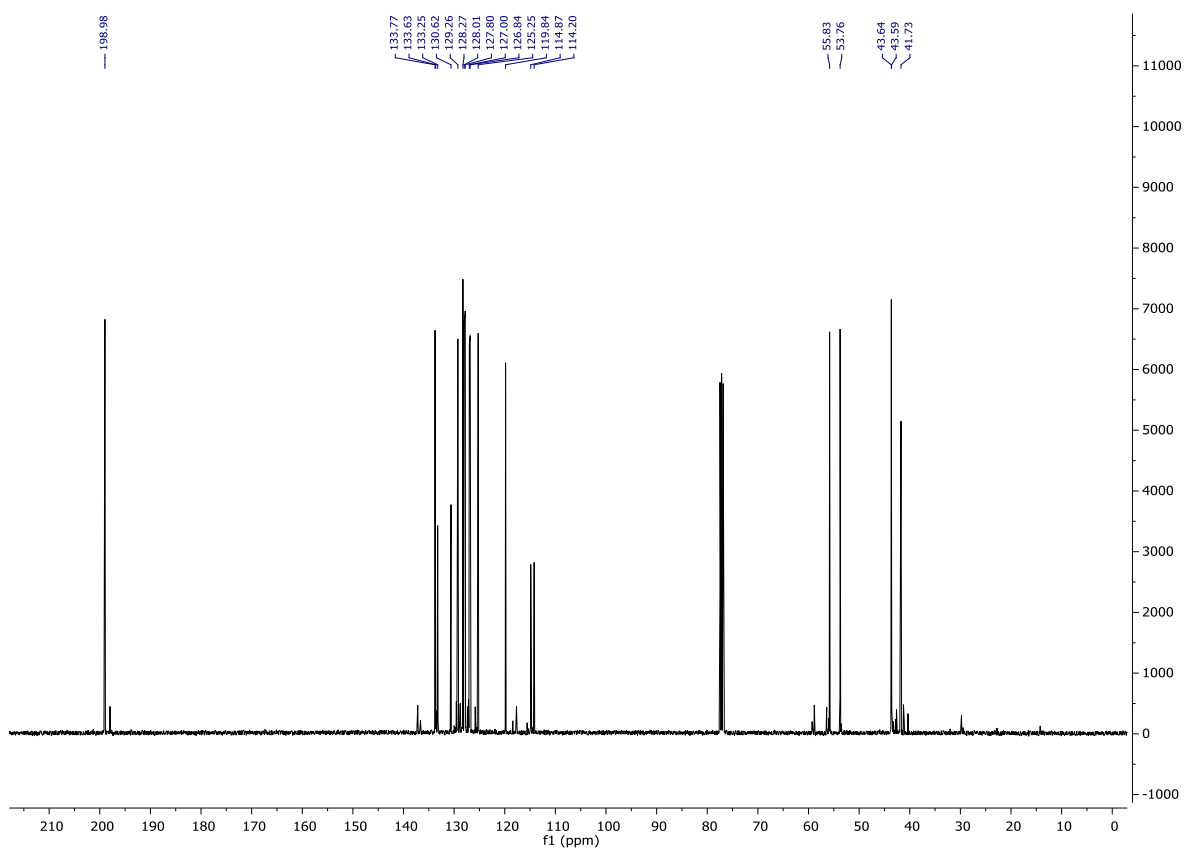

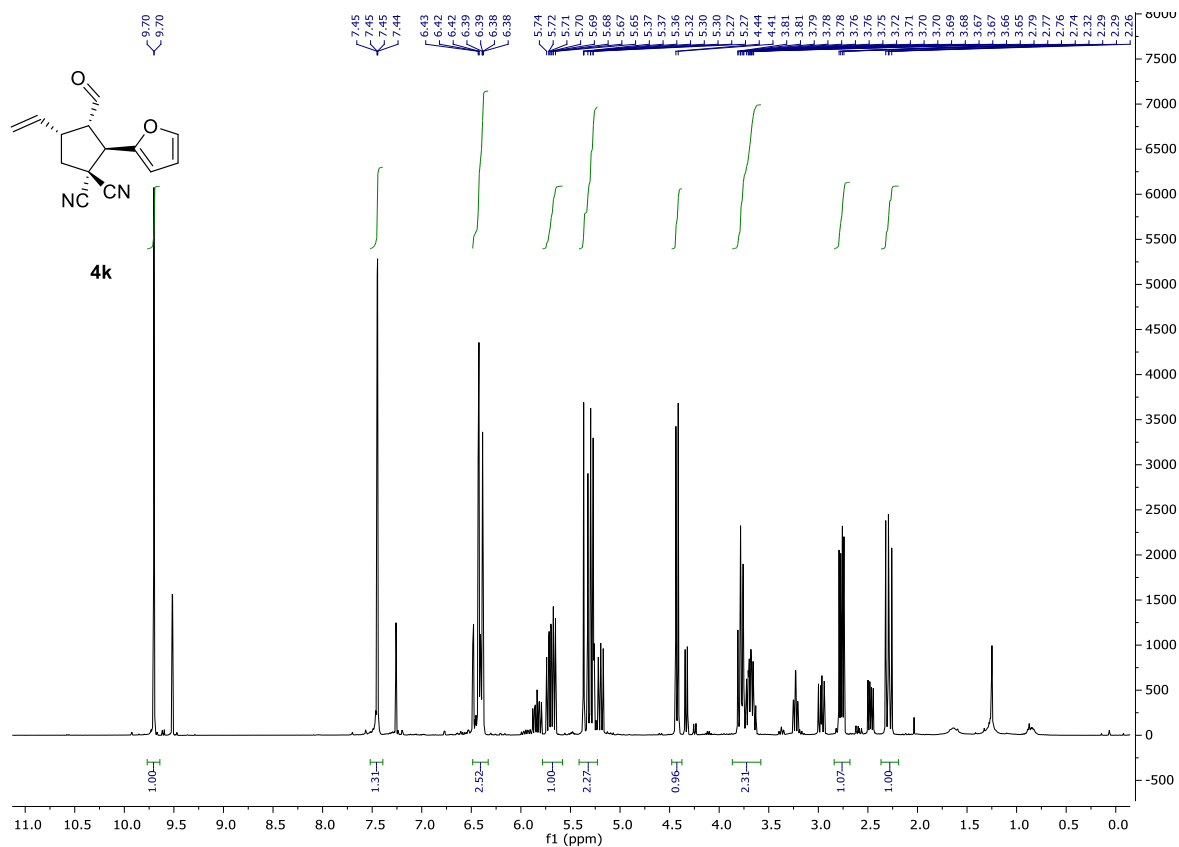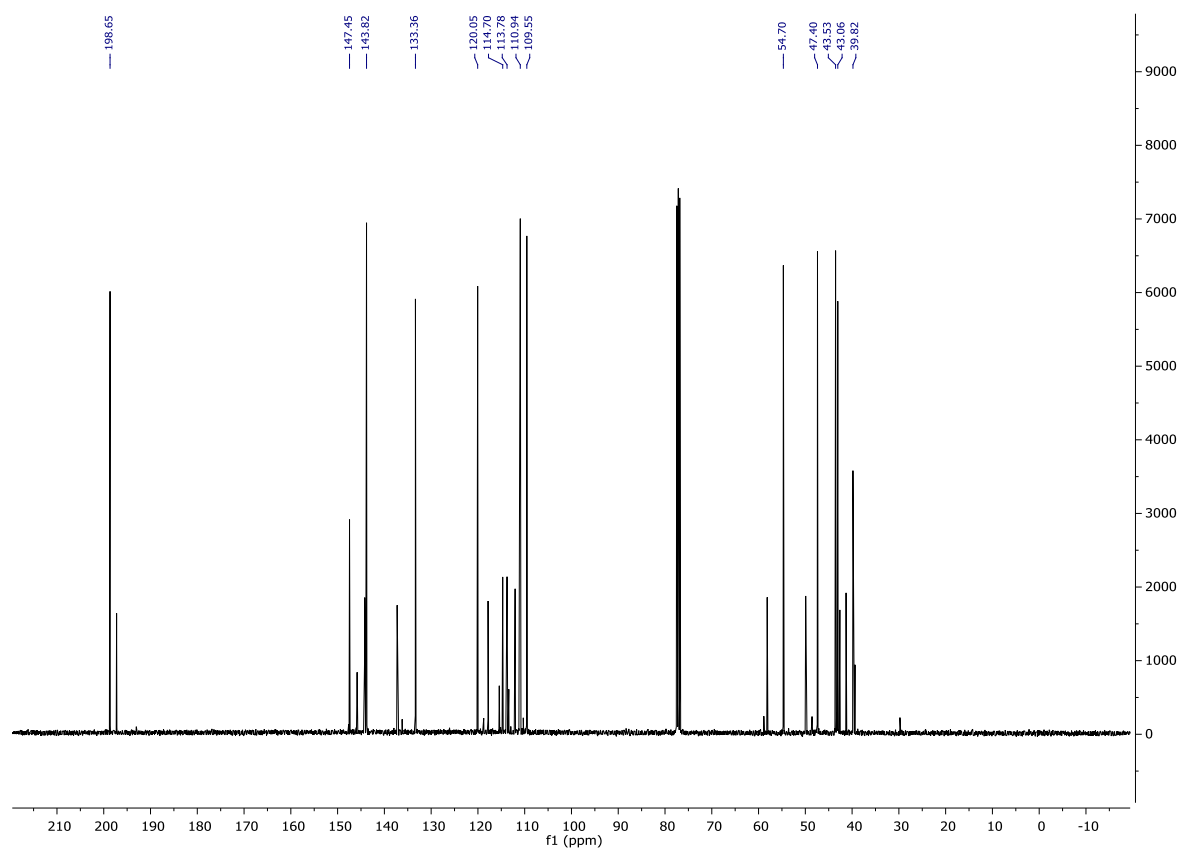

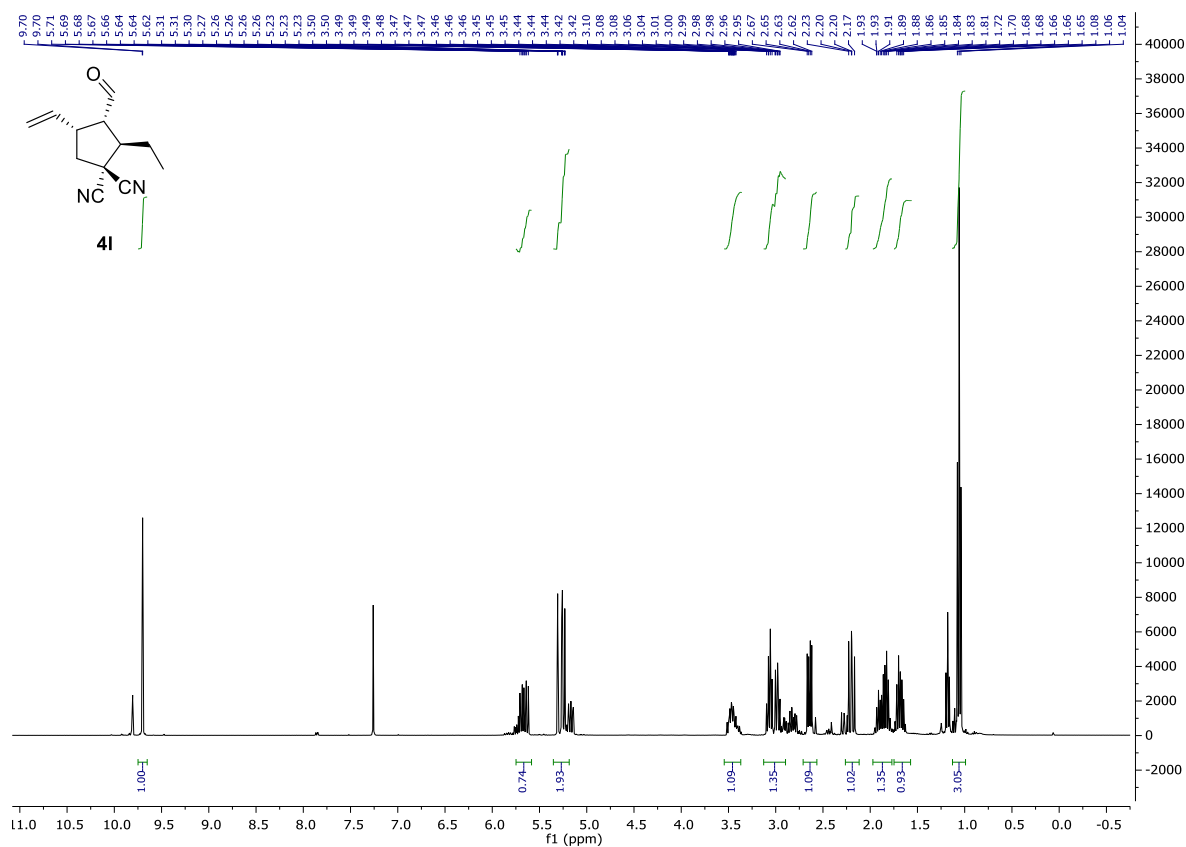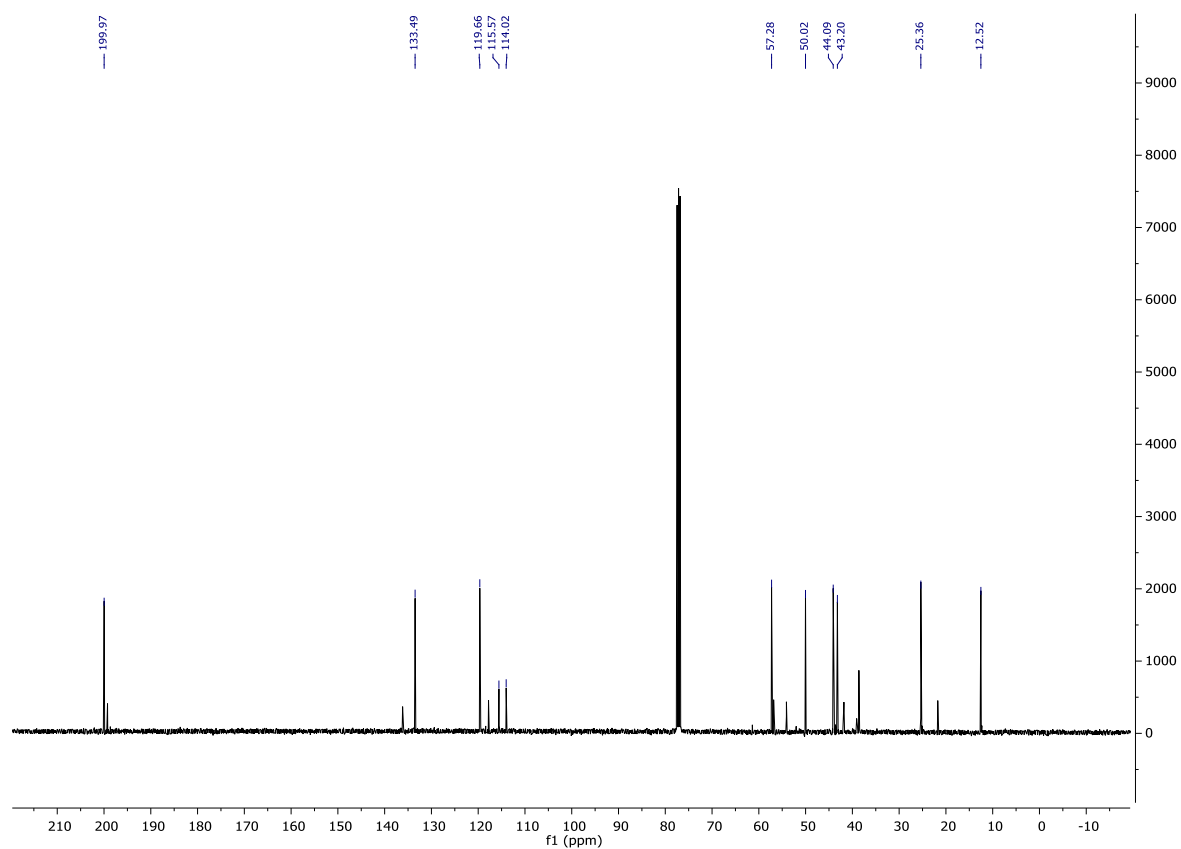

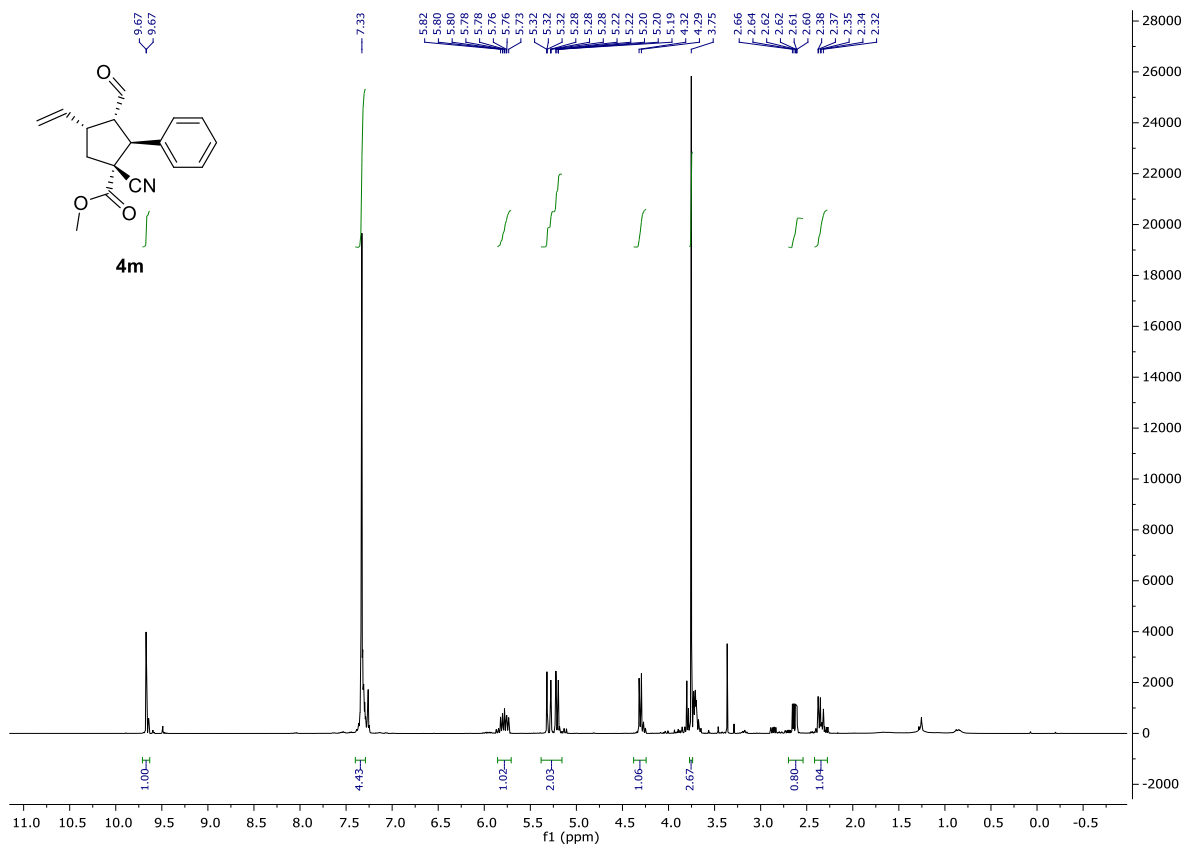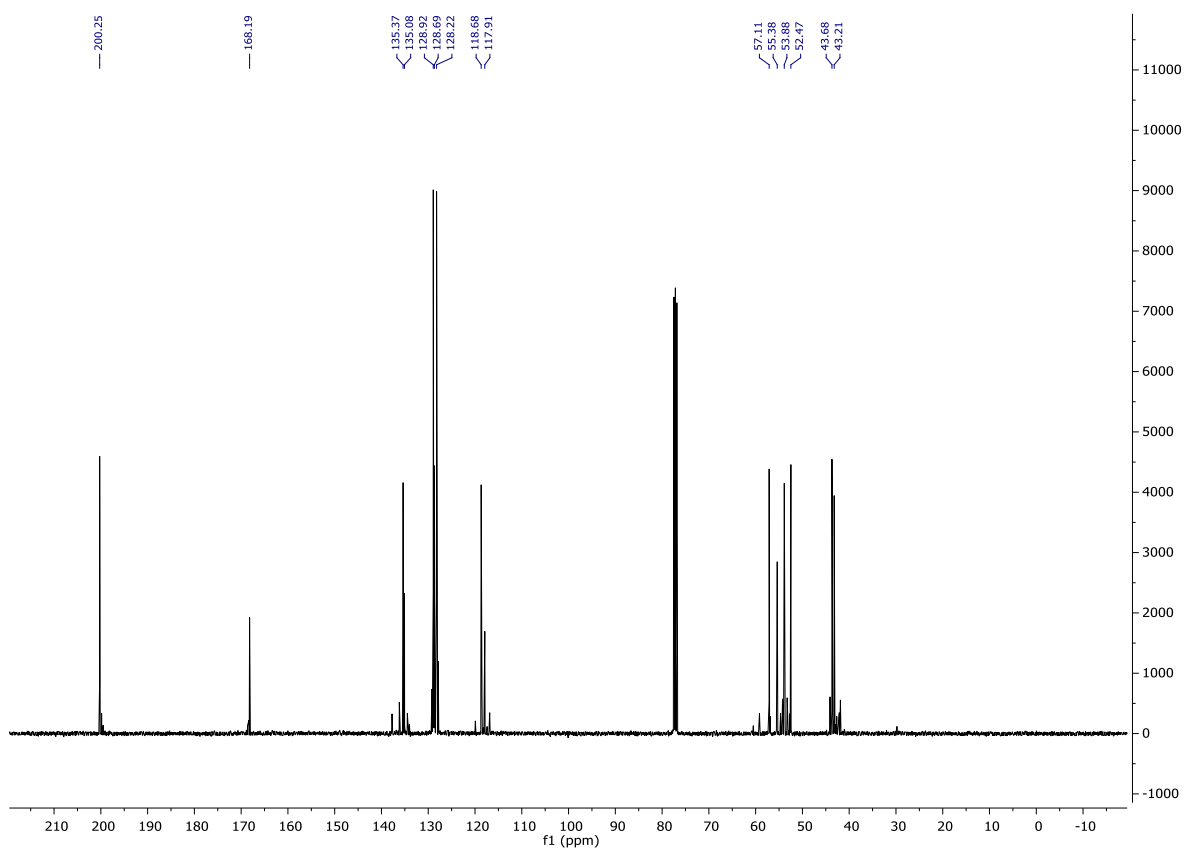

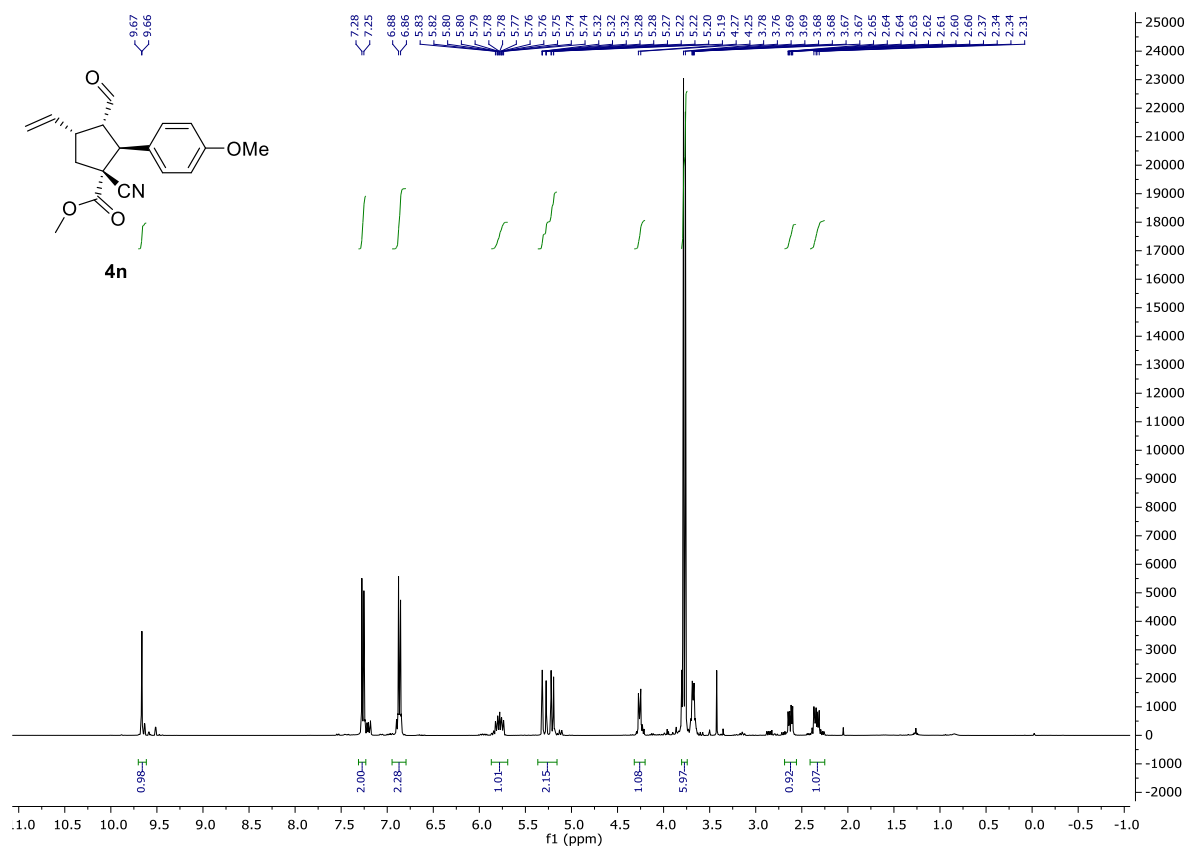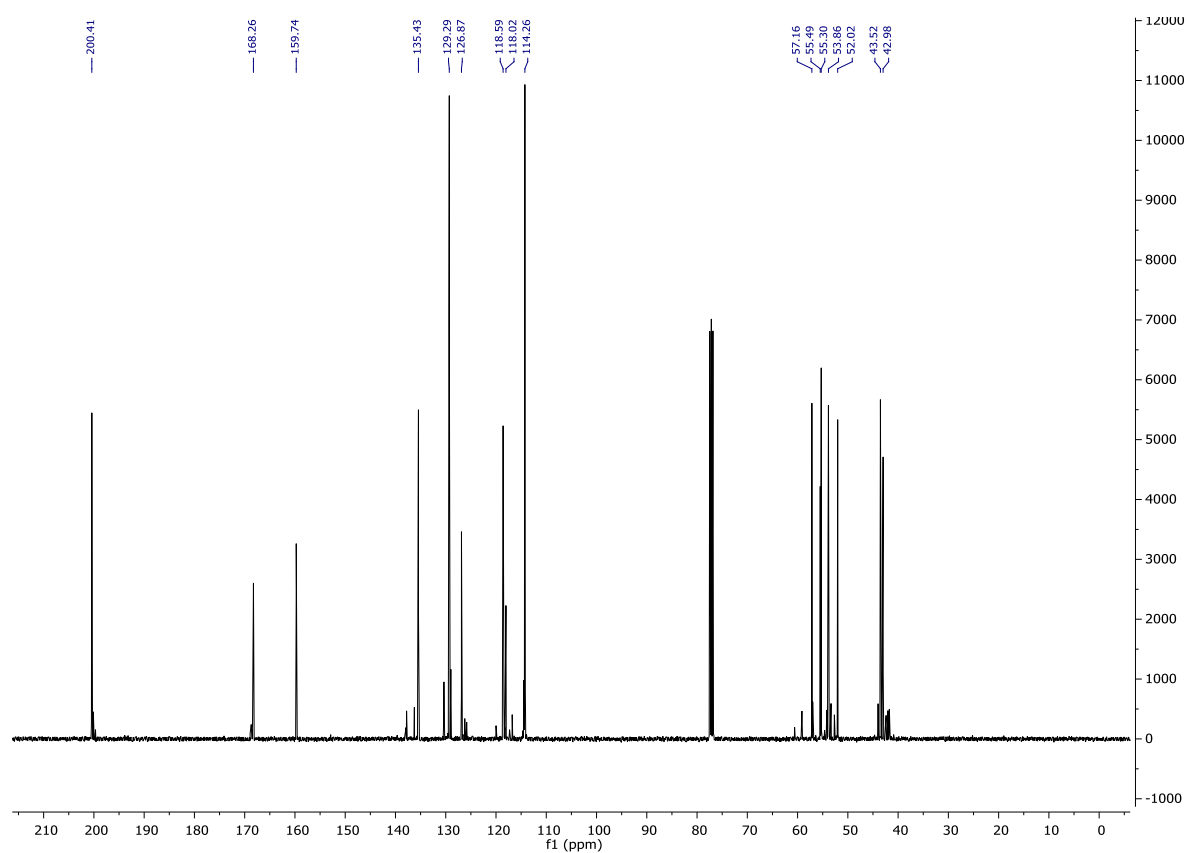

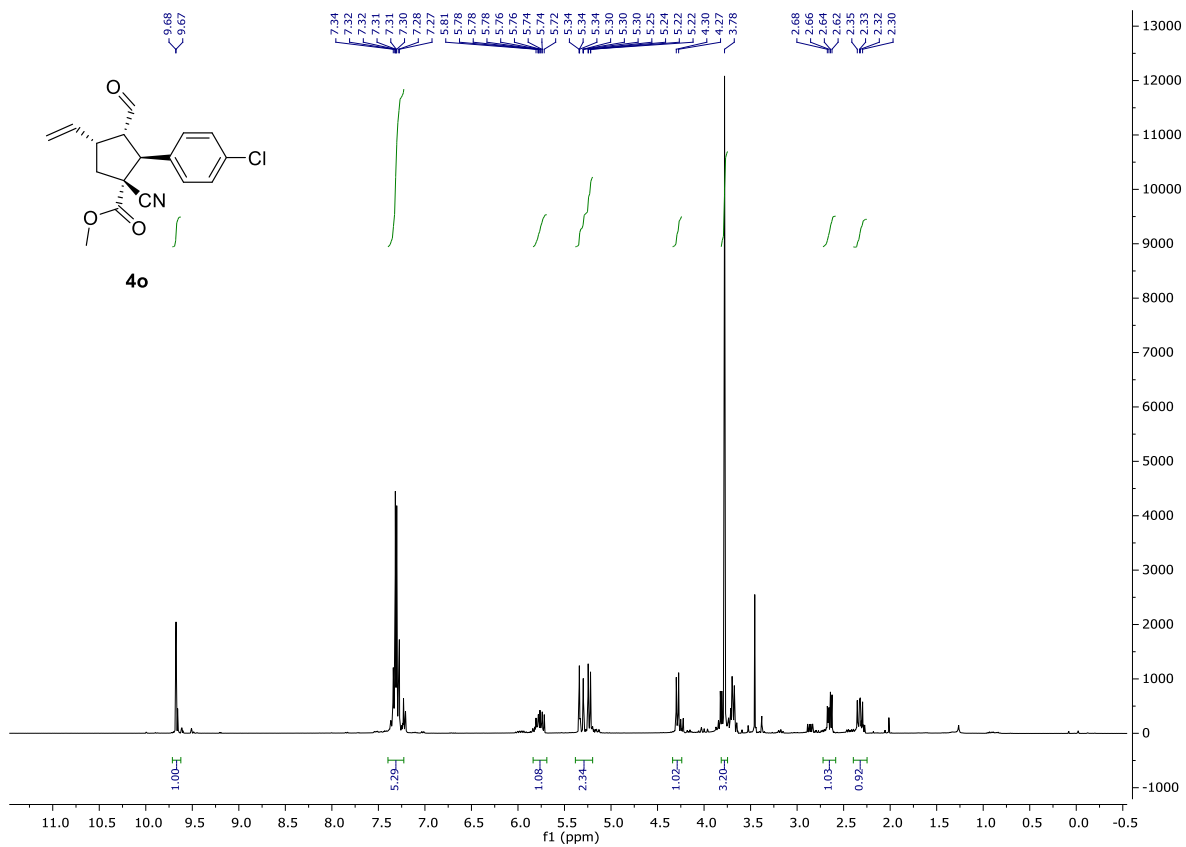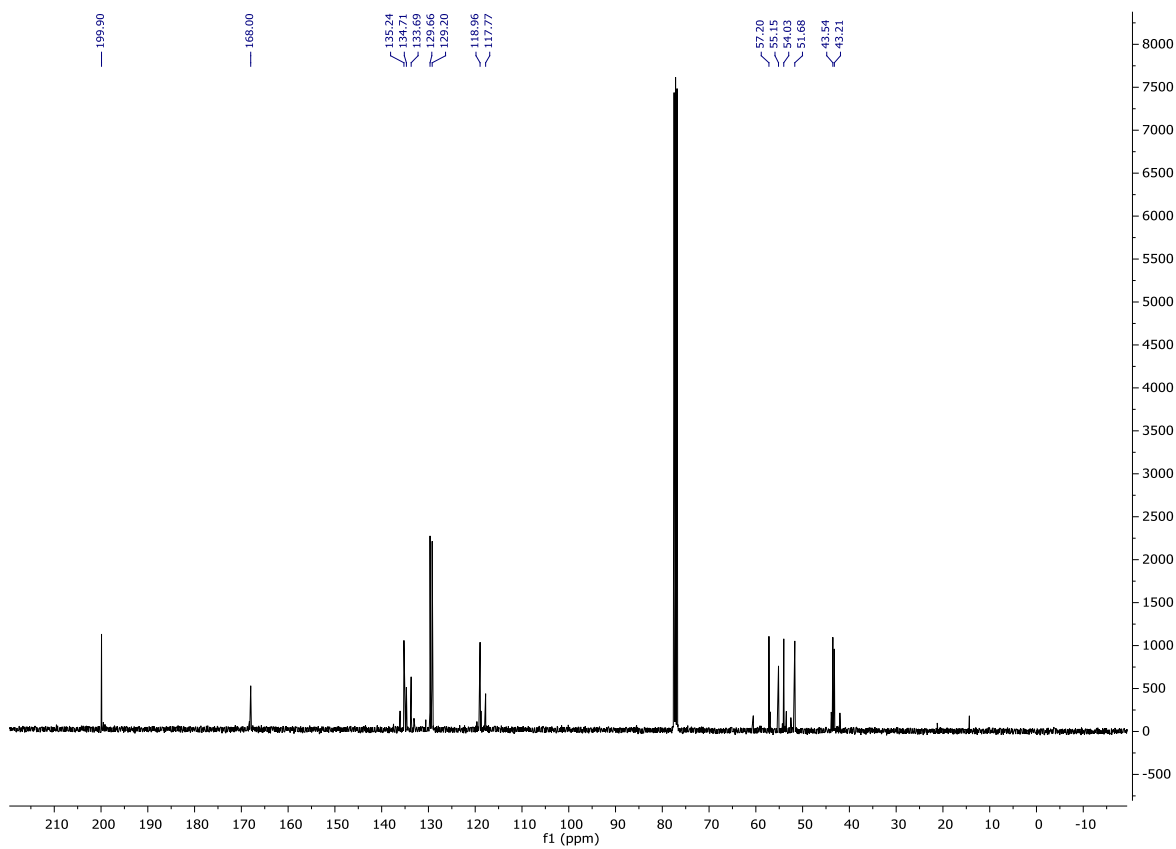

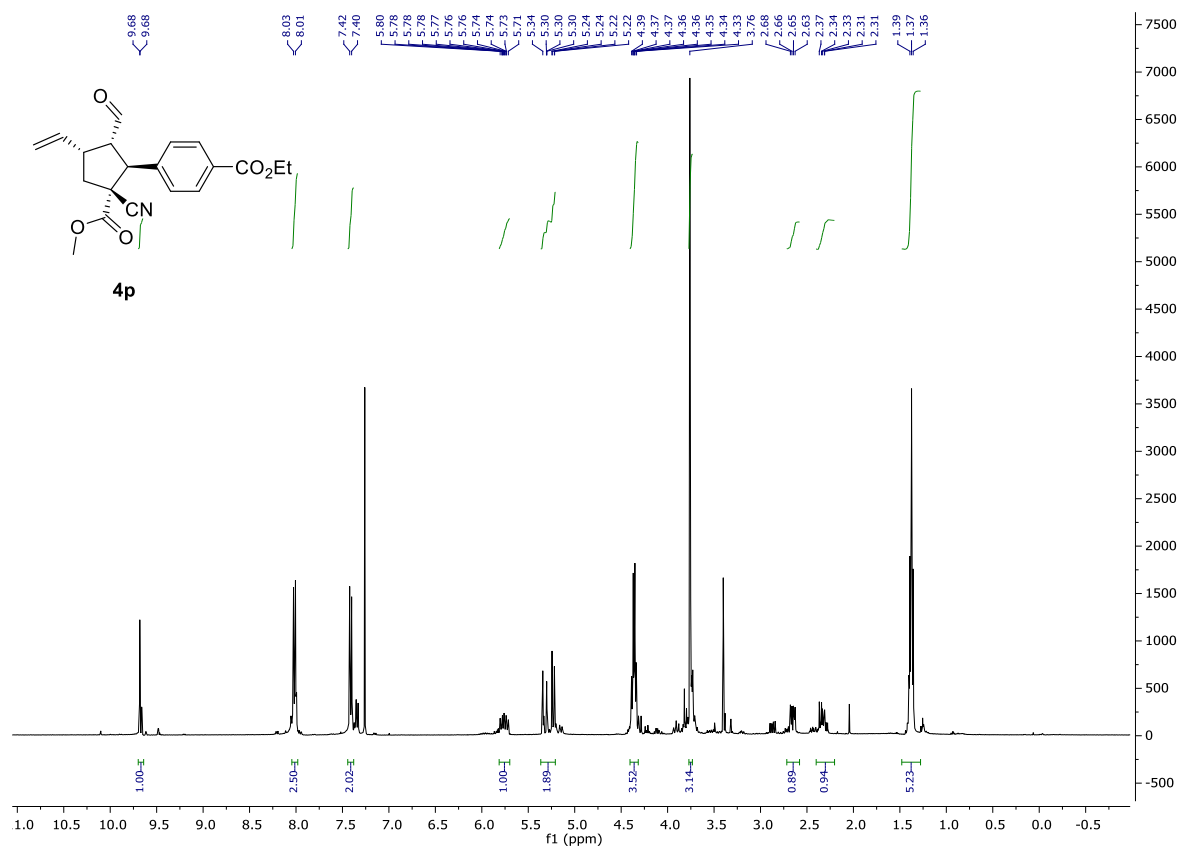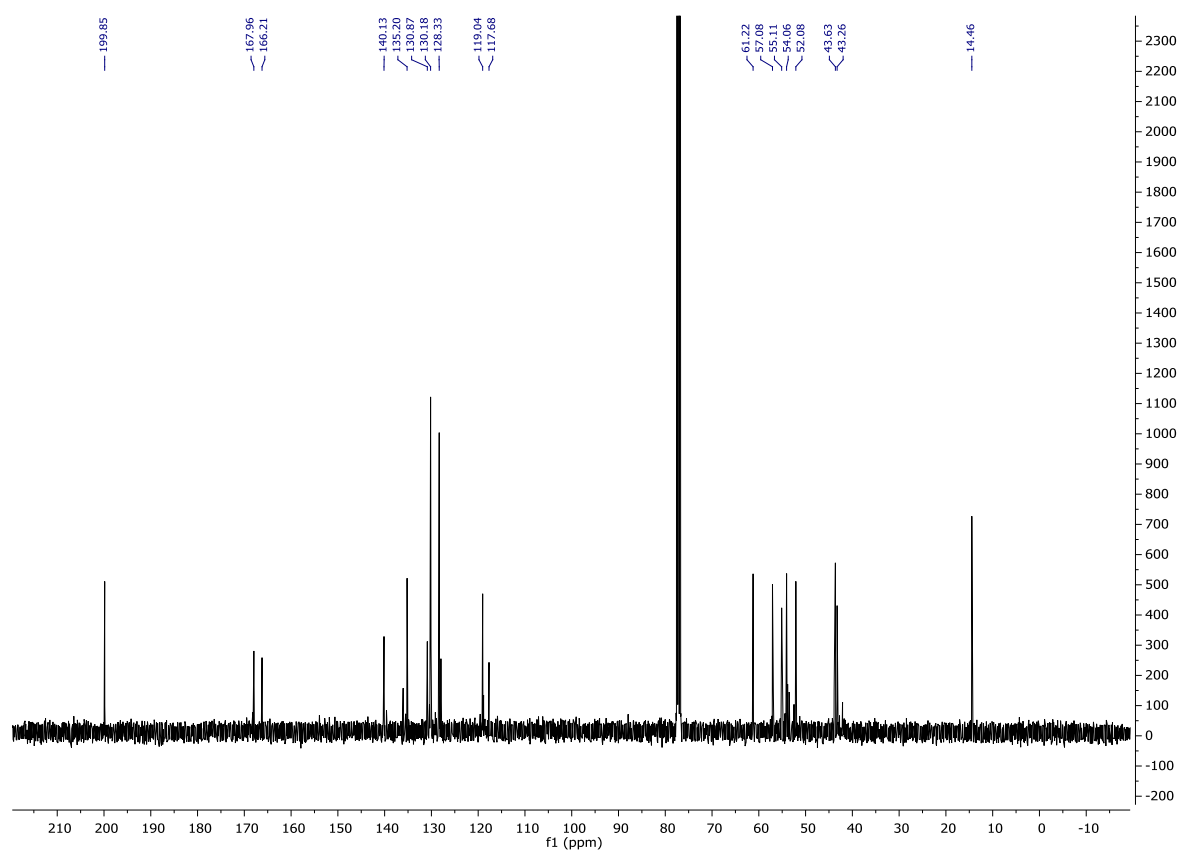

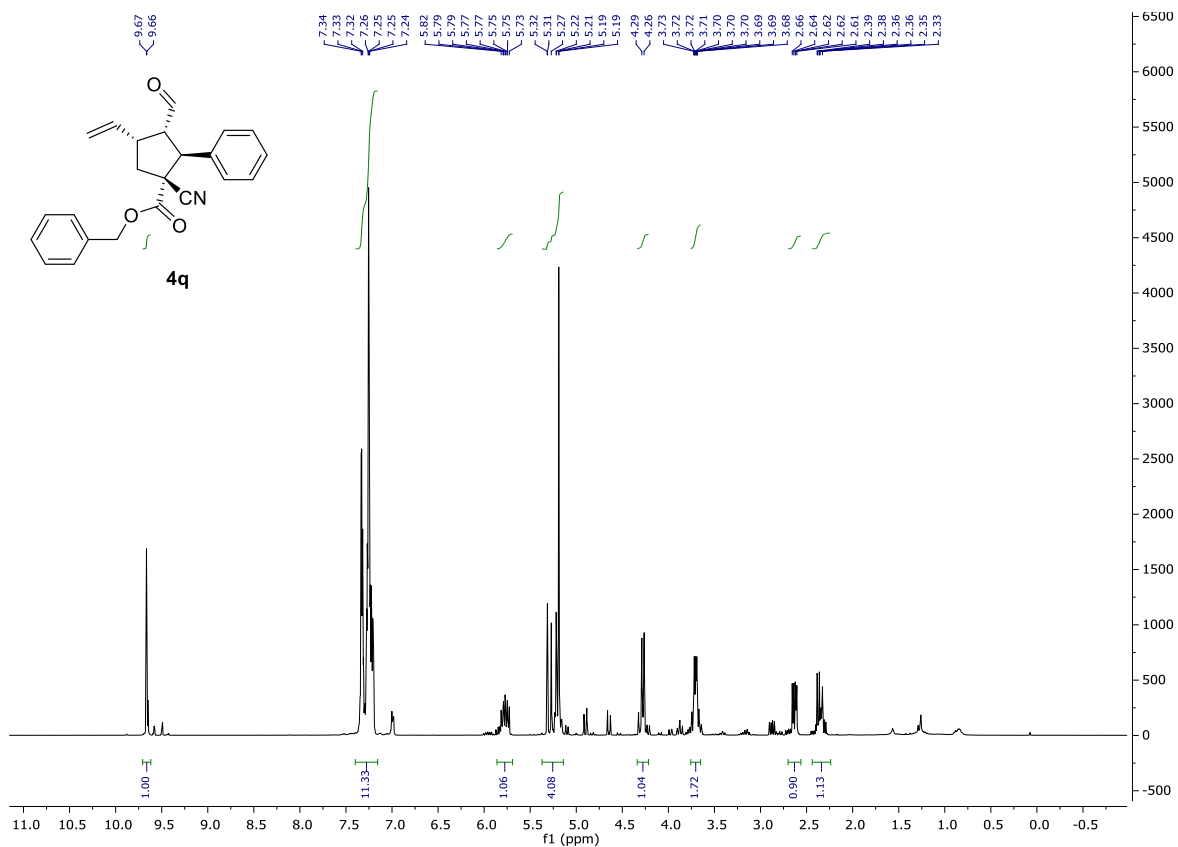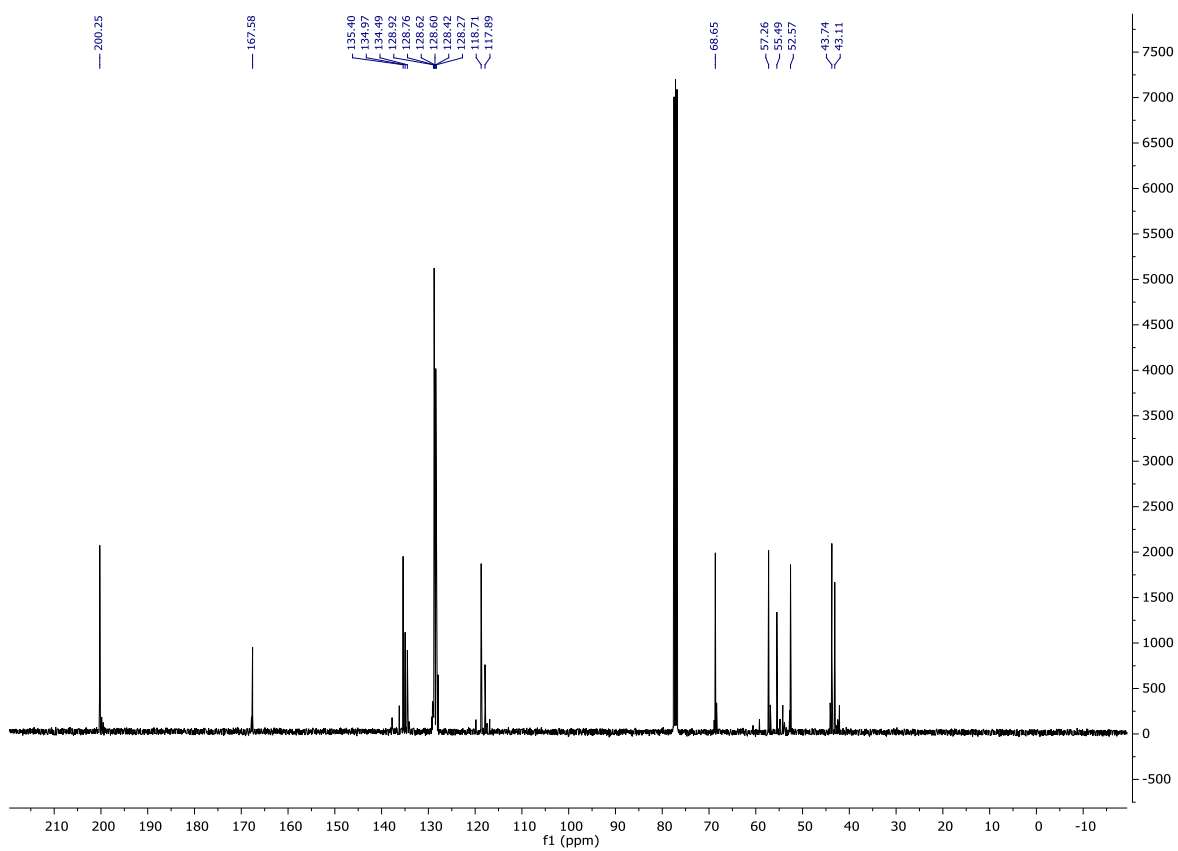

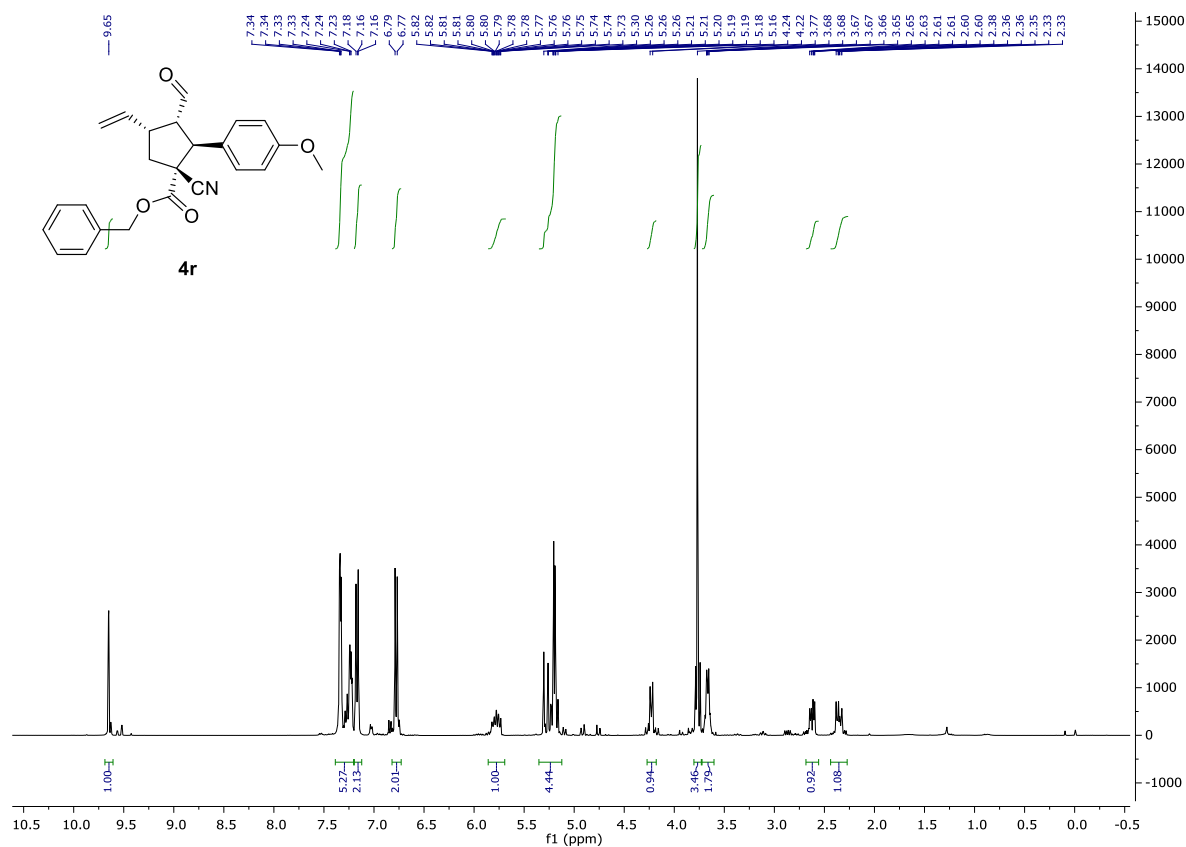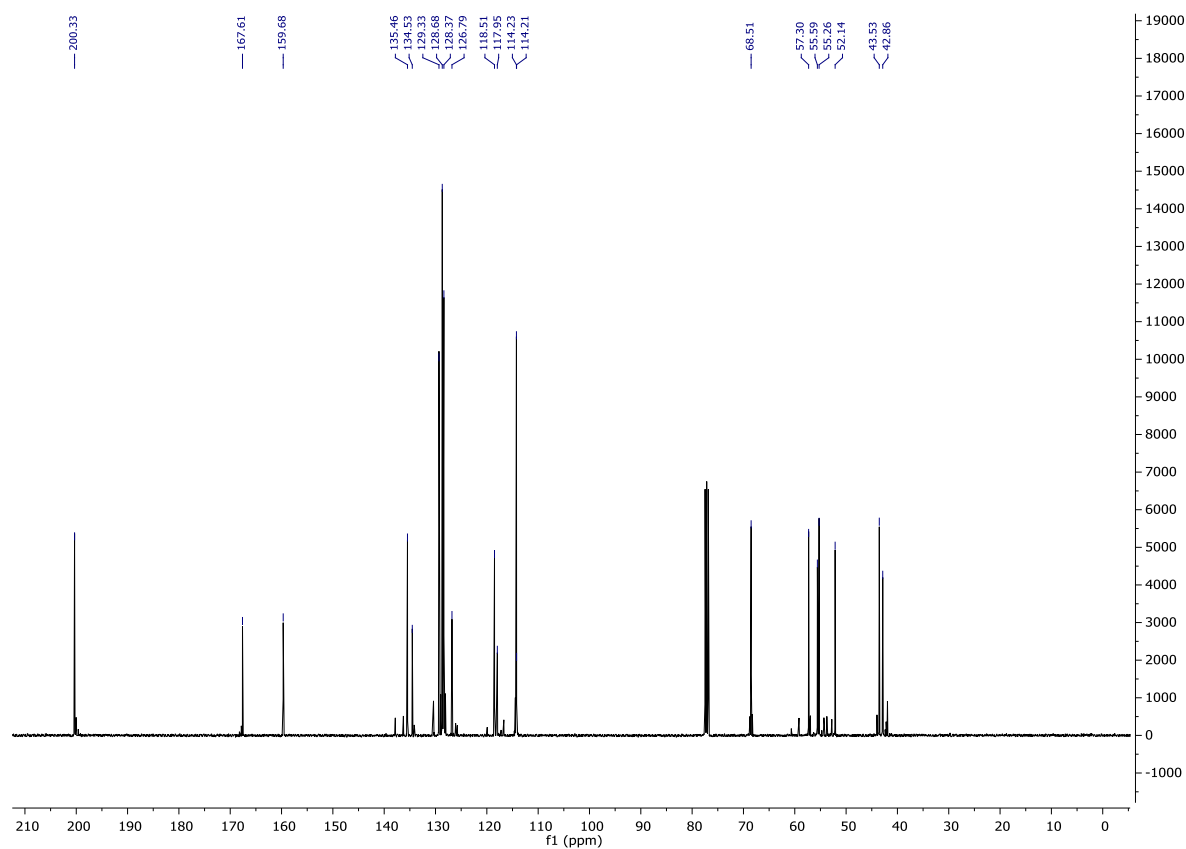

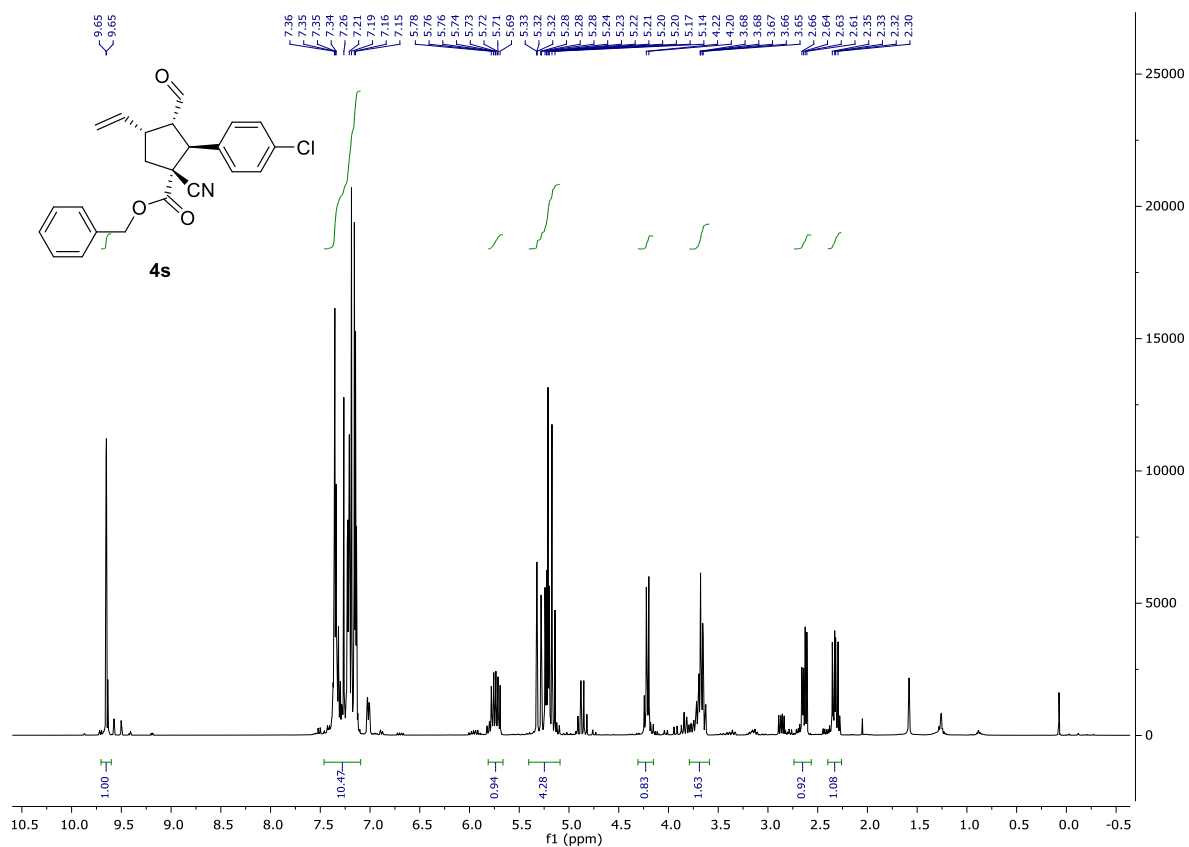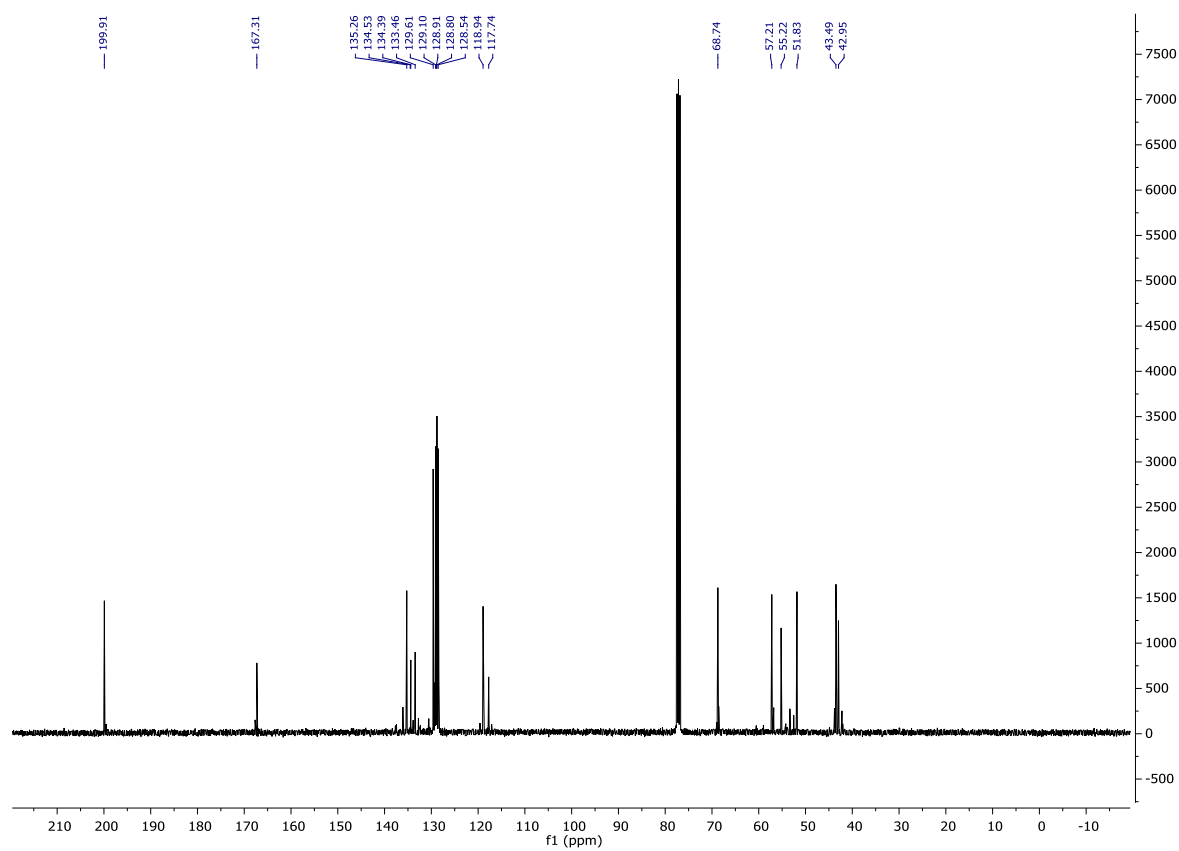

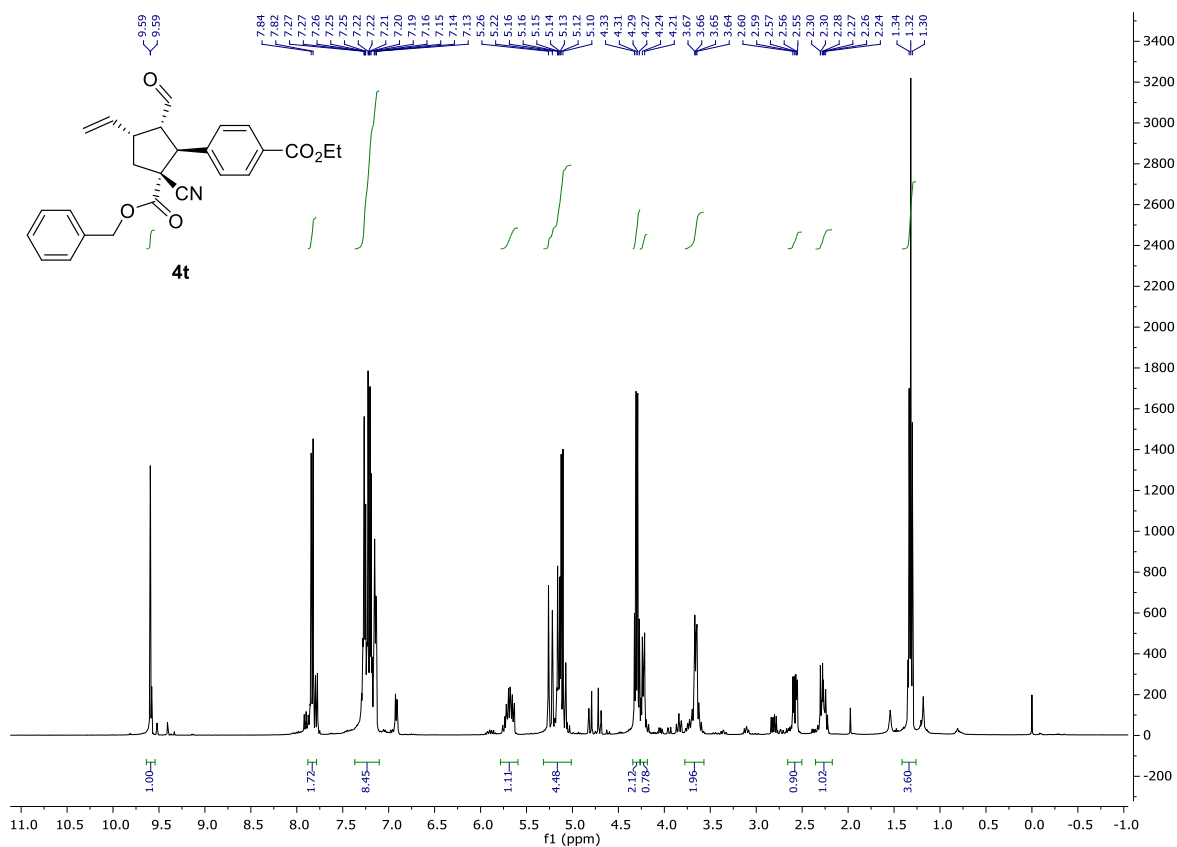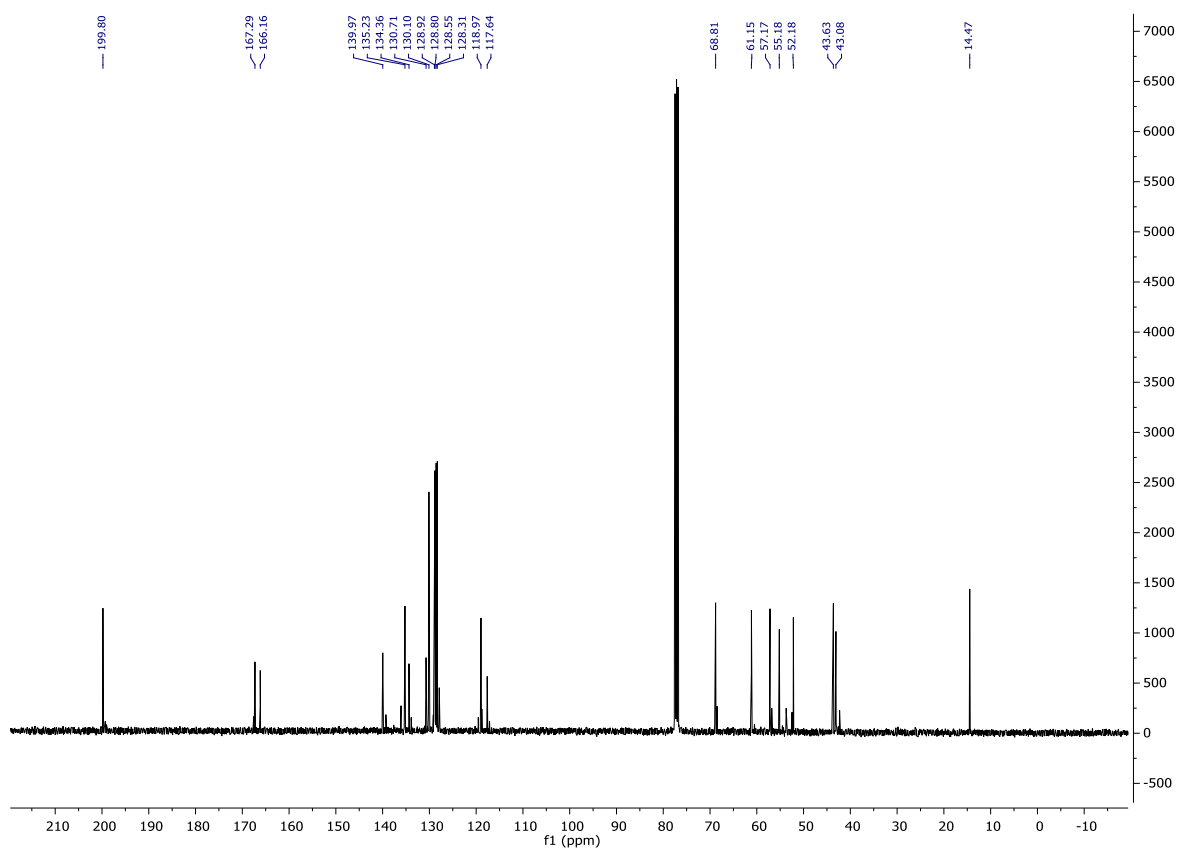

## 7. UPC<sup>2</sup> traces

Enantiomeric excesses of compounds **4** were measured on the corresponding Wittig olefination products (**4a'**-l', **4n'**-t') or on the corresponding diol **4m'**.

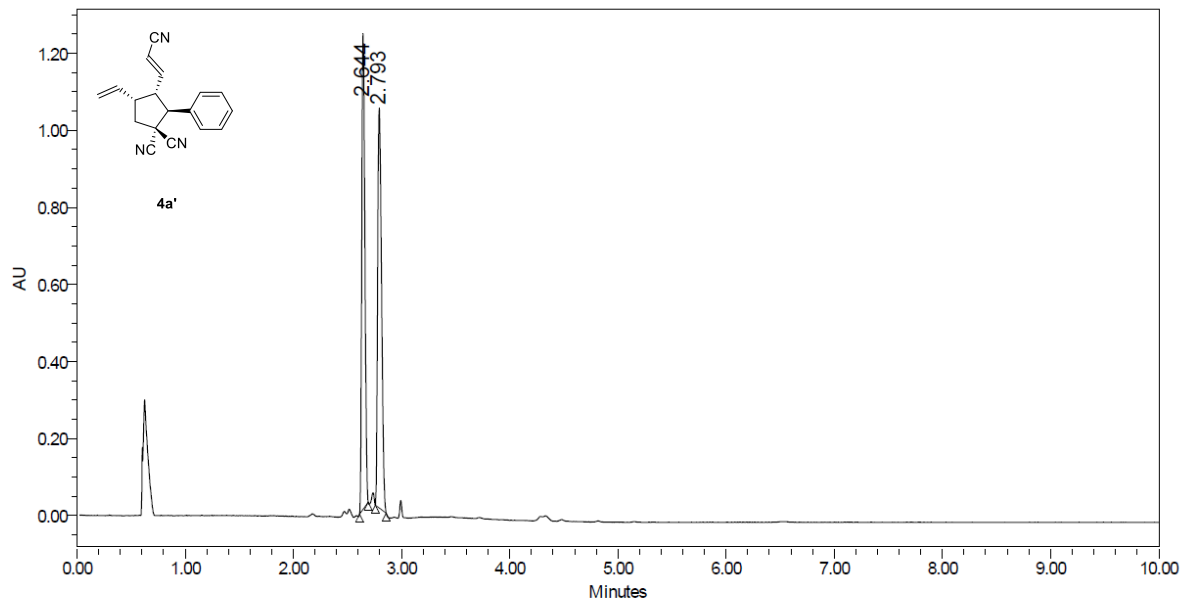

|   | Retention Time (min) | % Area |
|---|----------------------|--------|
| 1 | 2.644                | 48.69  |
| 2 | 2.793                | 51.31  |

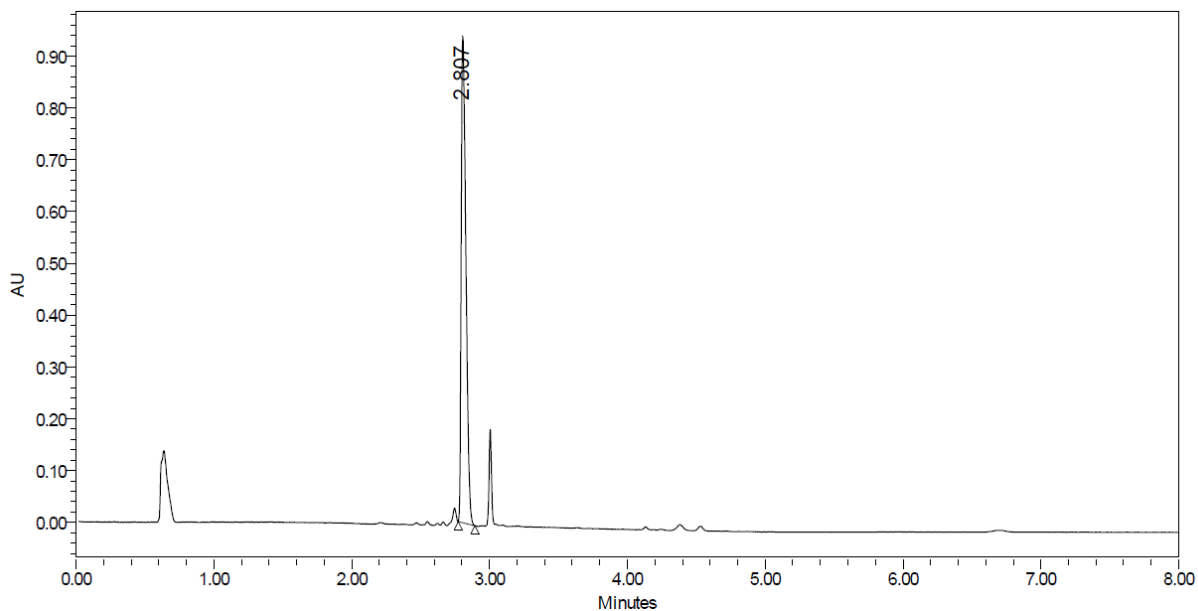

|   | Retention Time (min) | % Area |
|---|----------------------|--------|
| 1 | 2.807                | 100.00 |

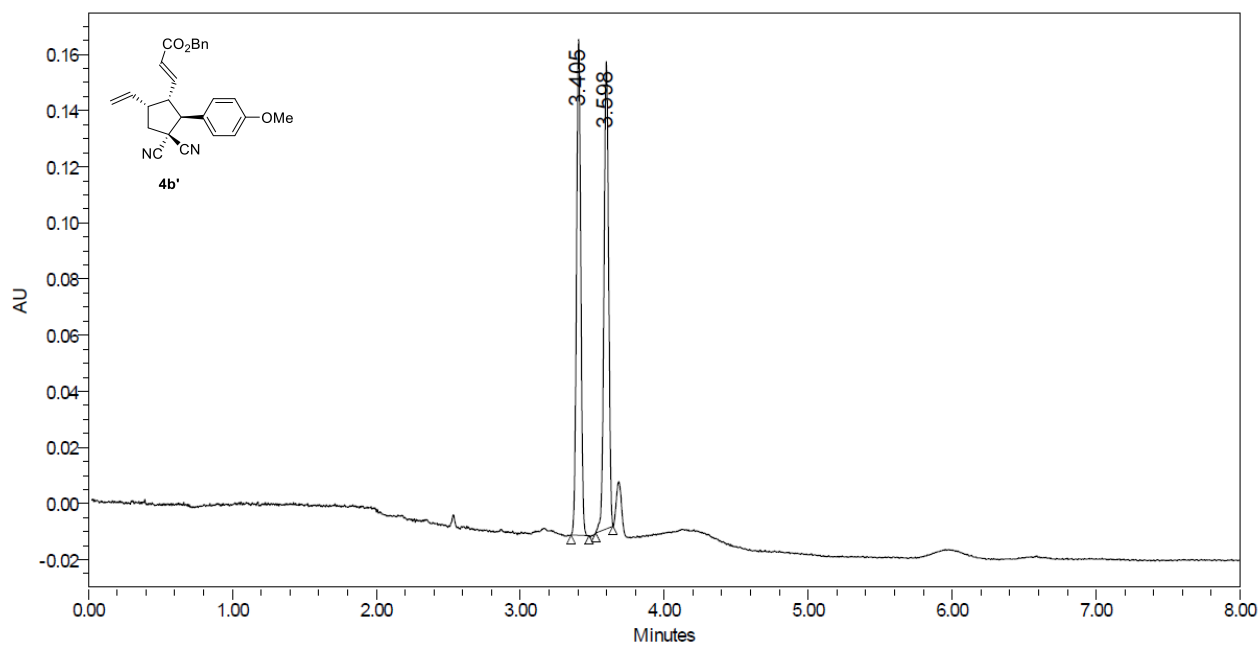

|   | Retention Time (min) | % Area |
|---|----------------------|--------|
| 1 | 3.405                | 49.54  |
| 2 | 3.598                | 50.46  |

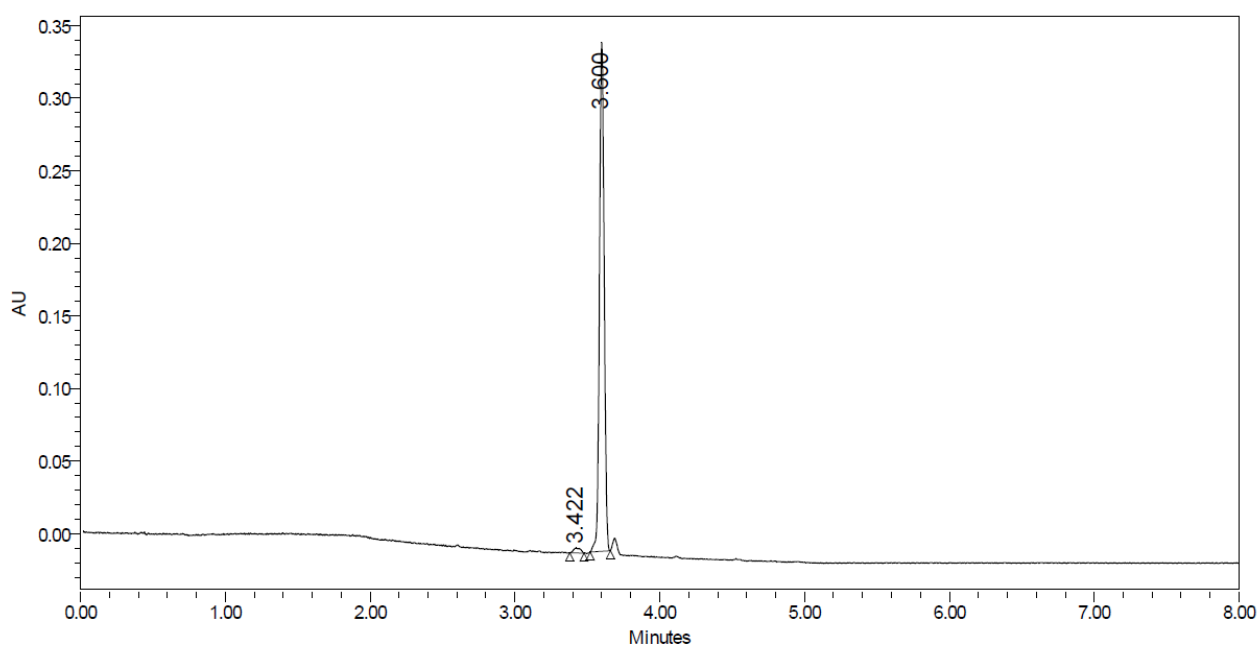

|   | Retention Time (min) | % Area |
|---|----------------------|--------|
| 1 | 3.422                | 1.41   |
| 2 | 3.600                | 98.59  |

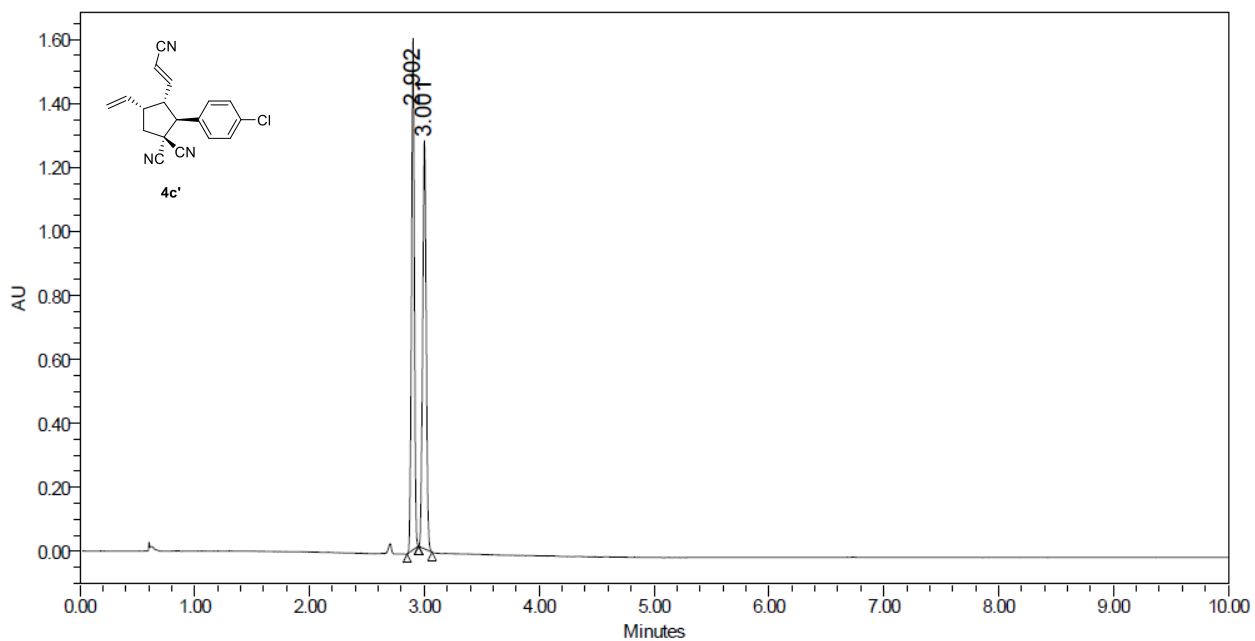

|   | Retention Time (min) | % Area |
|---|----------------------|--------|
| 1 | 2.902                | 49.92  |
| 2 | 3.001                | 50.08  |

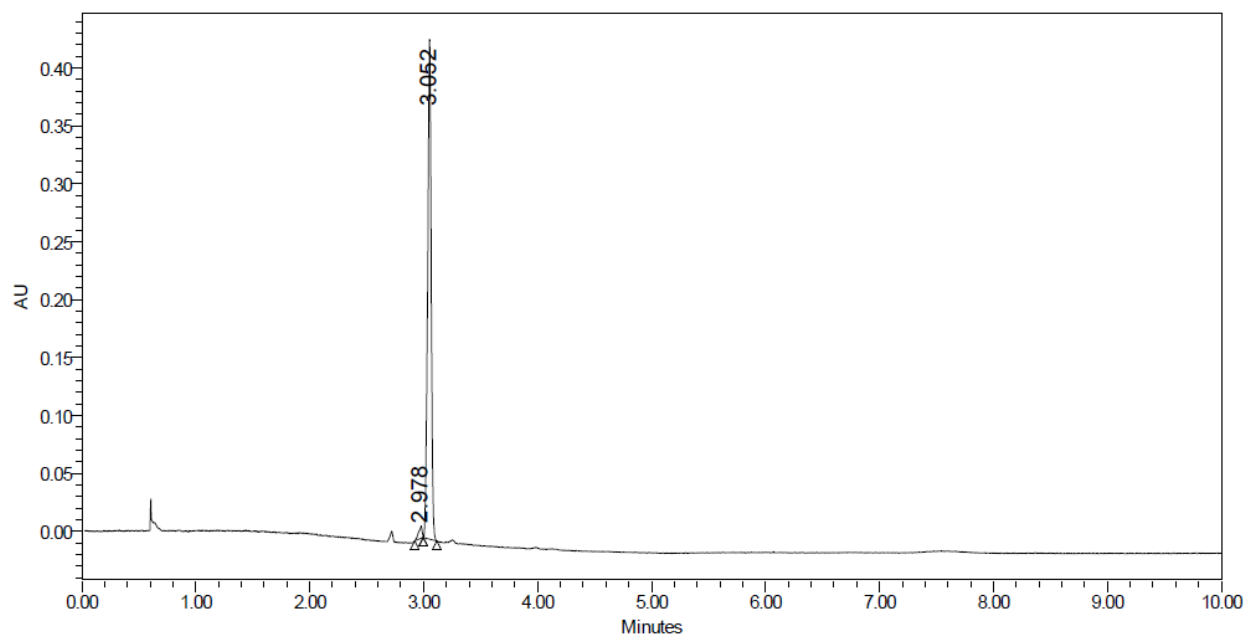

|   | Retention Time (min) | % Area |
|---|----------------------|--------|
| 1 | 2.978                | 2.31   |
| 2 | 3.052                | 97.69  |

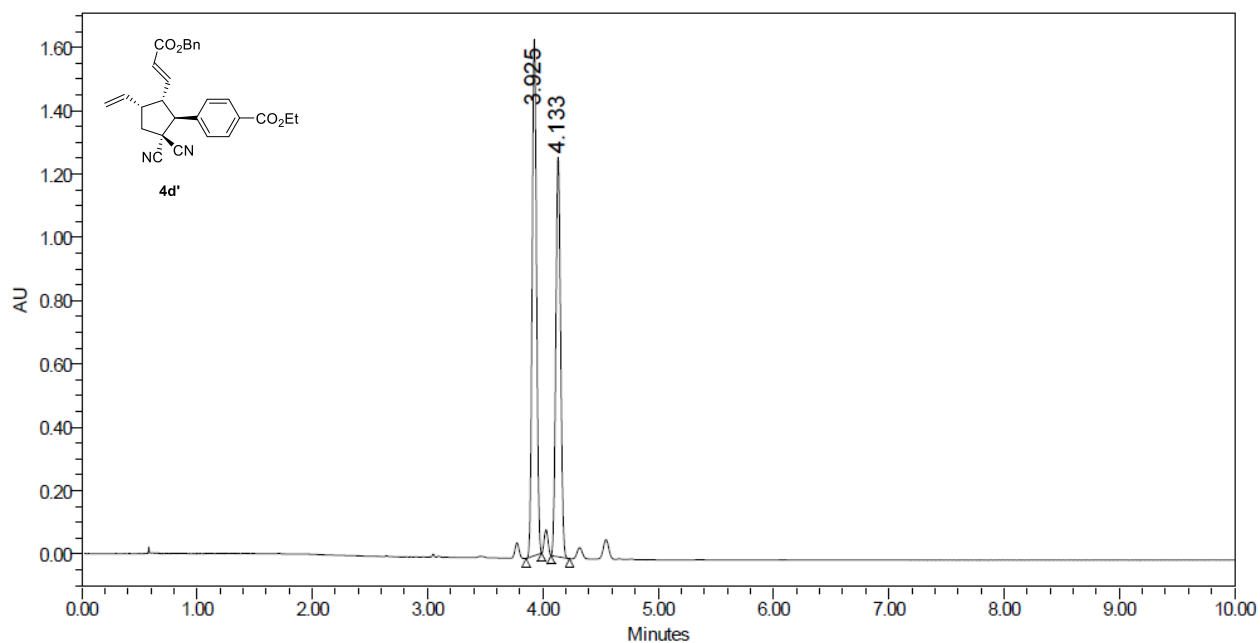

|   | Retention Time (min) | % Area |
|---|----------------------|--------|
| 1 | 3.925                | 54.14  |
| 2 | 4.133                | 45.86  |

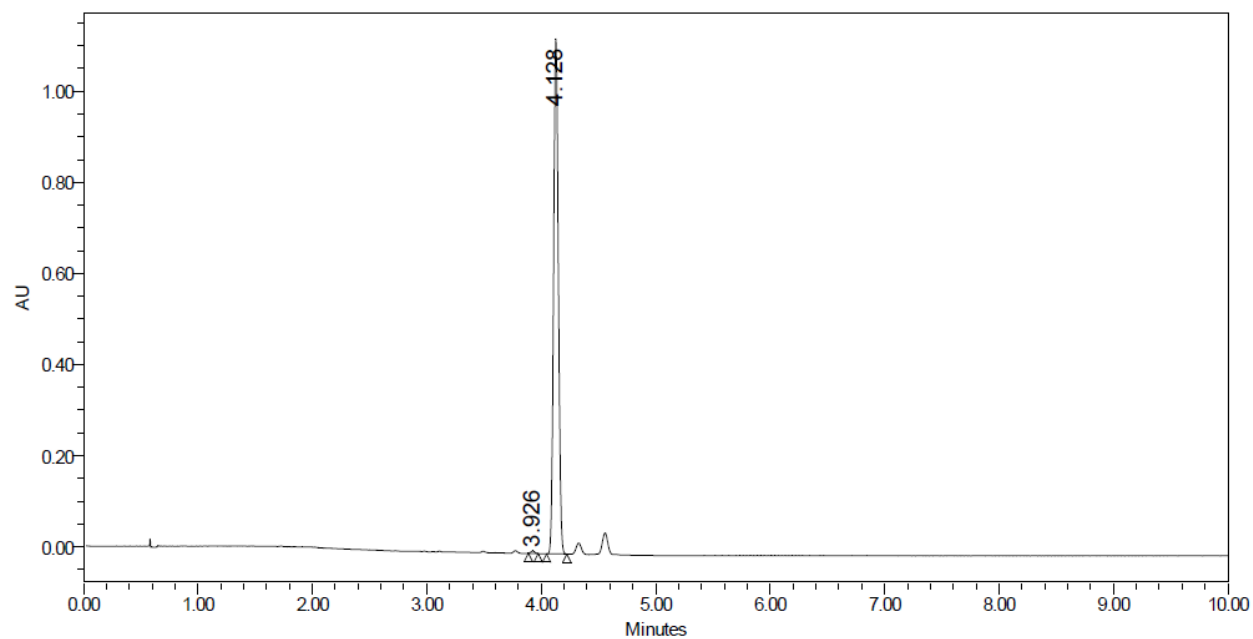

|   | Retention Time (min) | % Area |
|---|----------------------|--------|
| 1 | 3.926                | 0.39   |
| 2 | 4.128                | 99.61  |

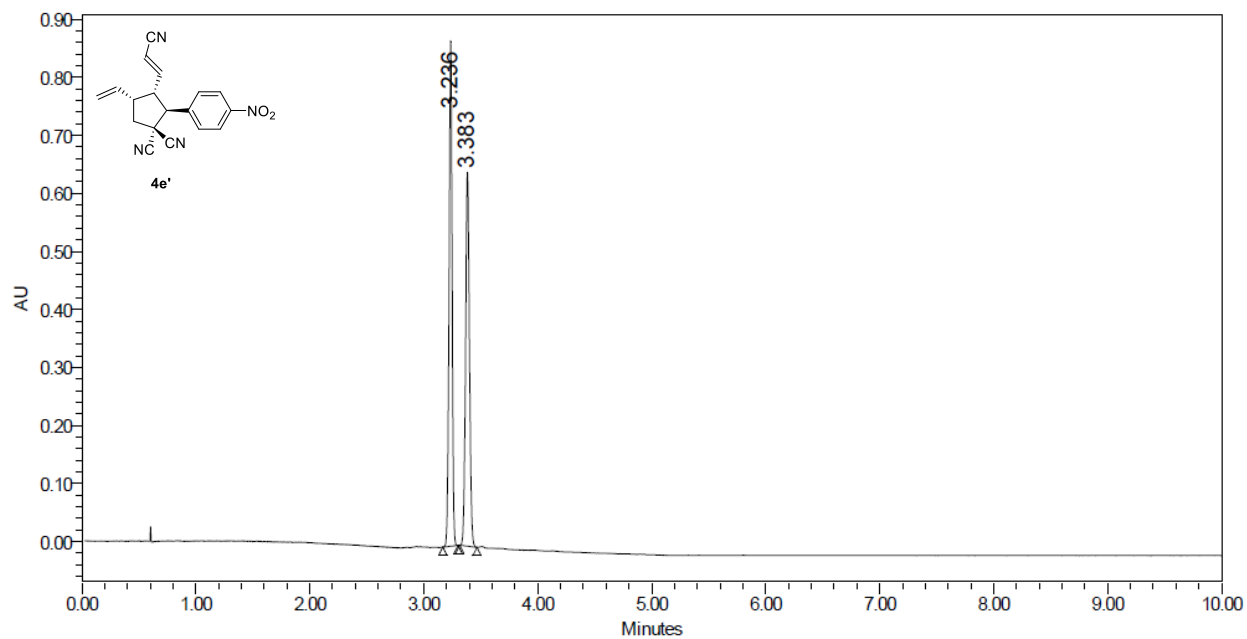

|   | Retention Time (min) | % Area |
|---|----------------------|--------|
| 1 | 3.236                | 51.24  |
| 2 | 3.383                | 48.76  |

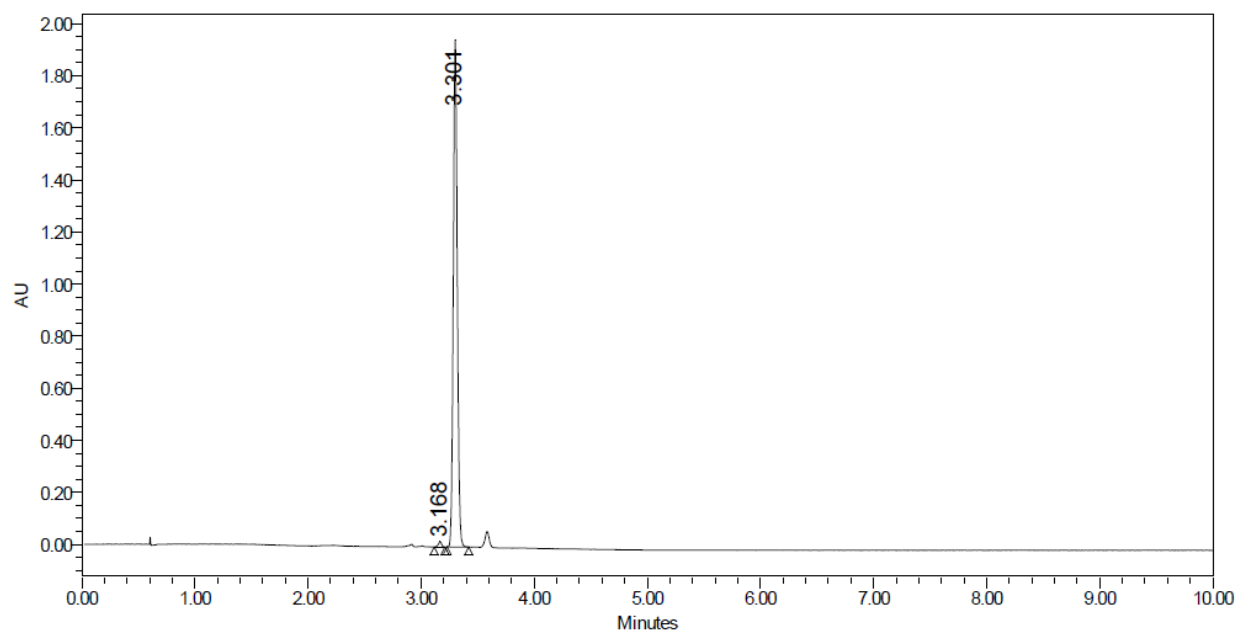

|   | Retention Time (min) | % Area |
|---|----------------------|--------|
| 1 | 3.168                | 0.85   |
| 2 | 3.301                | 99.15  |

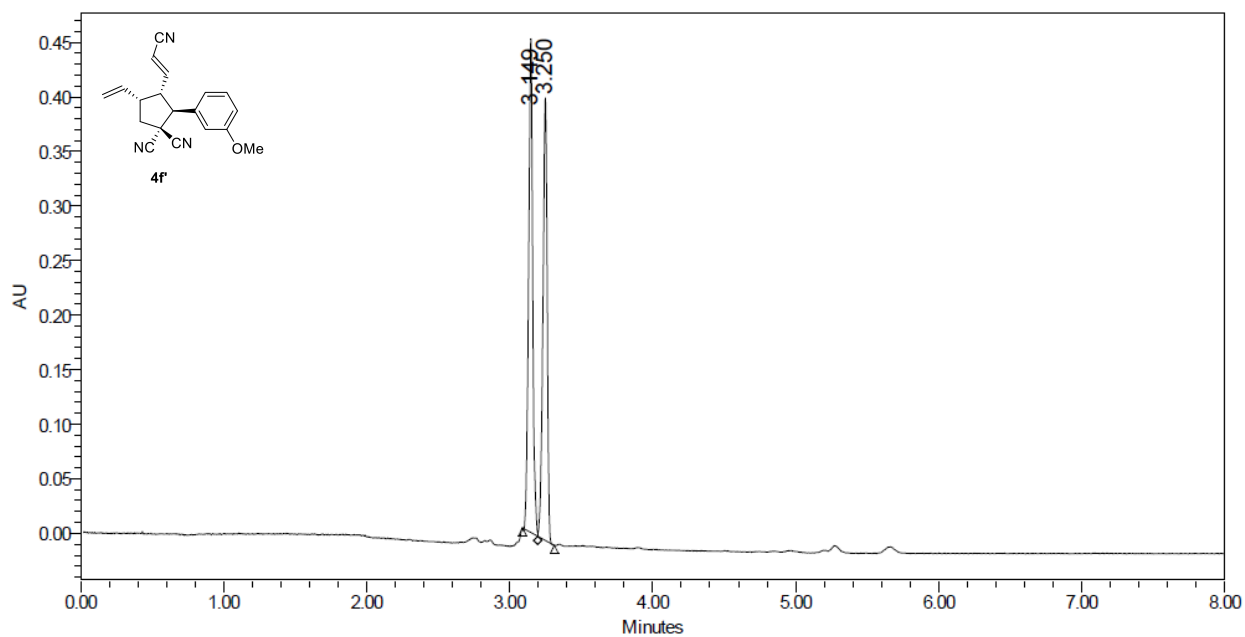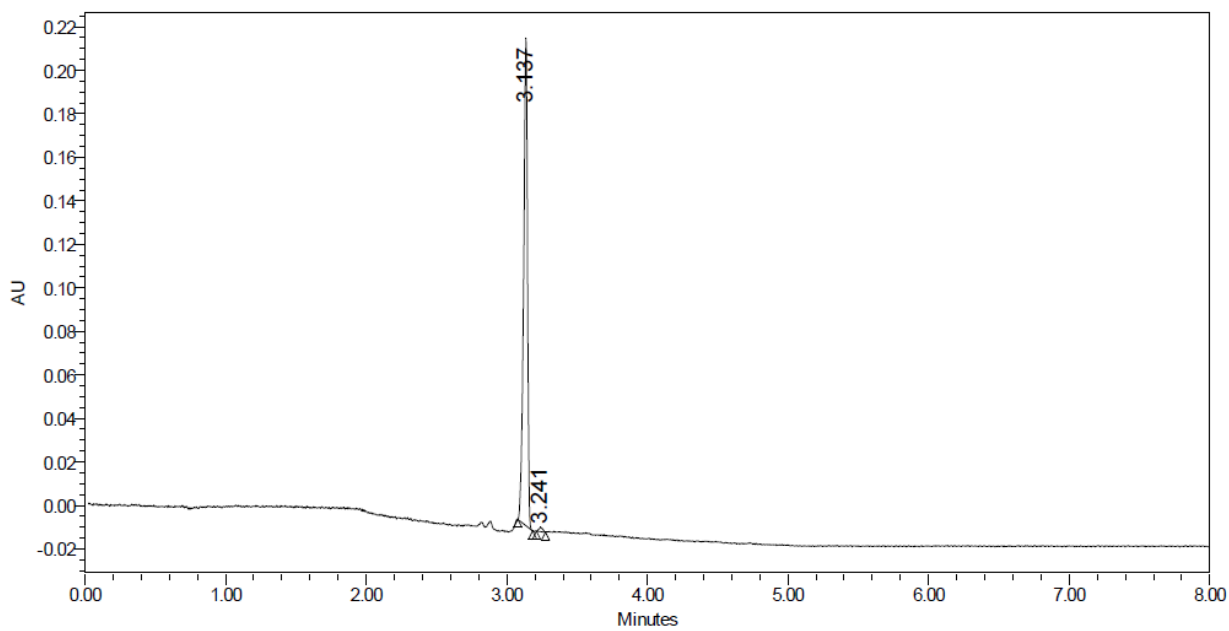

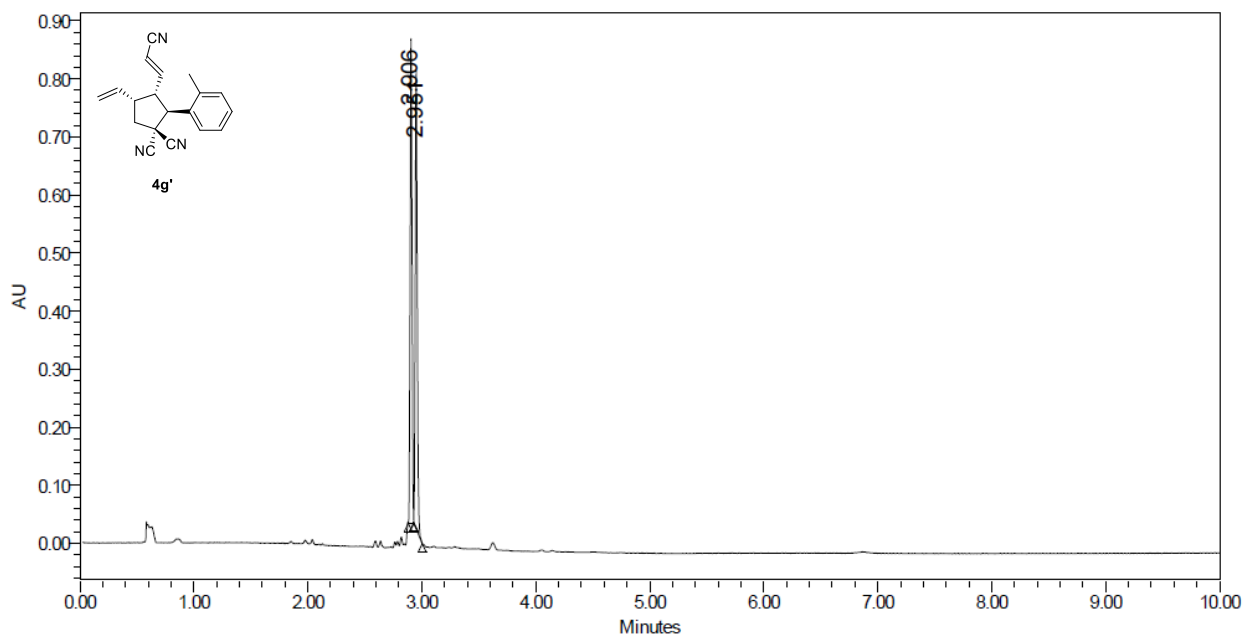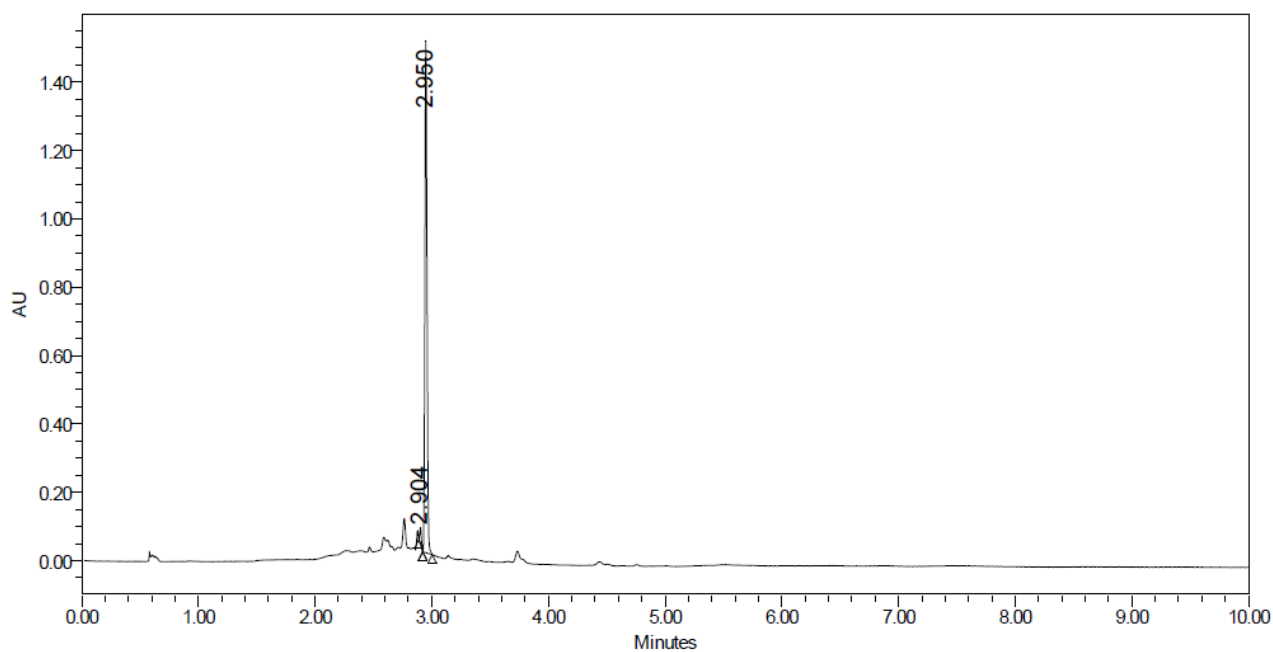

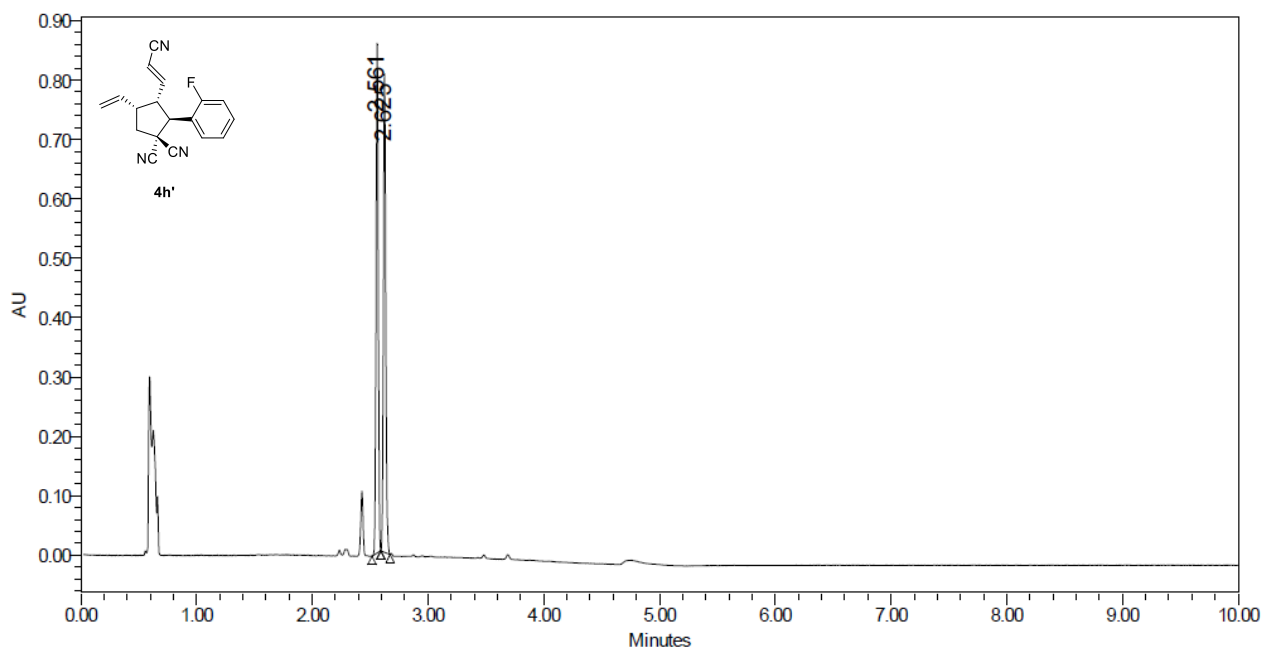

|   | Retention Time (min) | % Area |
|---|----------------------|--------|
| 1 | 2.561                | 50.20  |
| 2 | 2.625                | 49.80  |

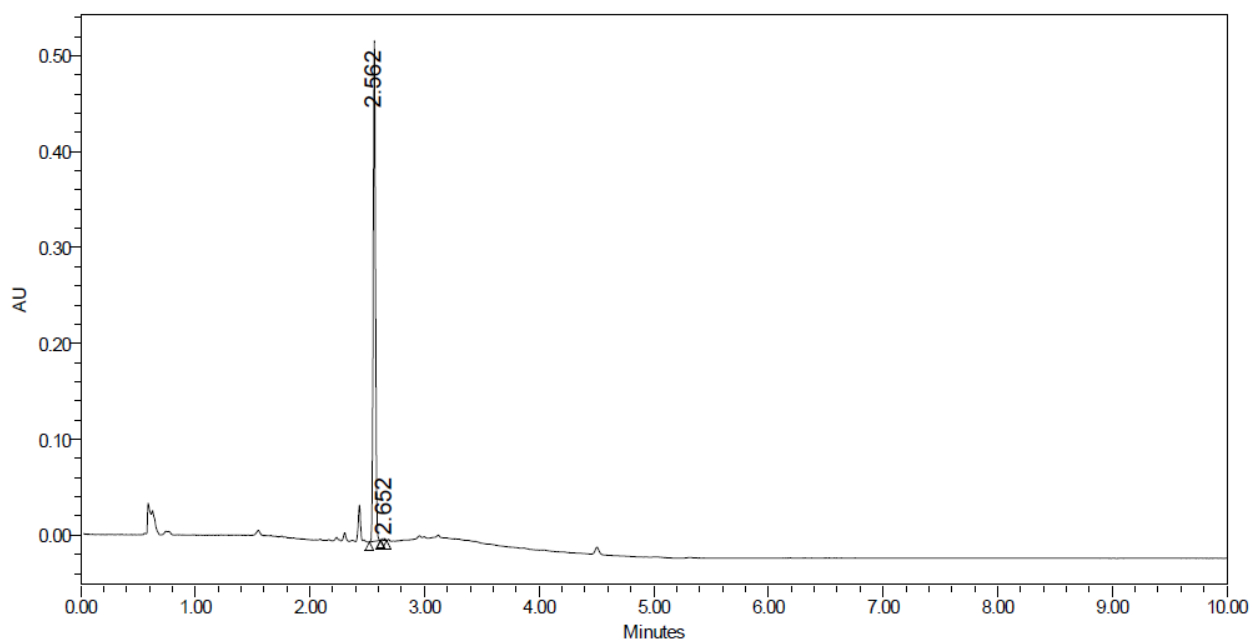

|   | Retention Time (min) | % Area |
|---|----------------------|--------|
| 1 | 2.562                | 99.51  |
| 2 | 2.652                | 0.49   |

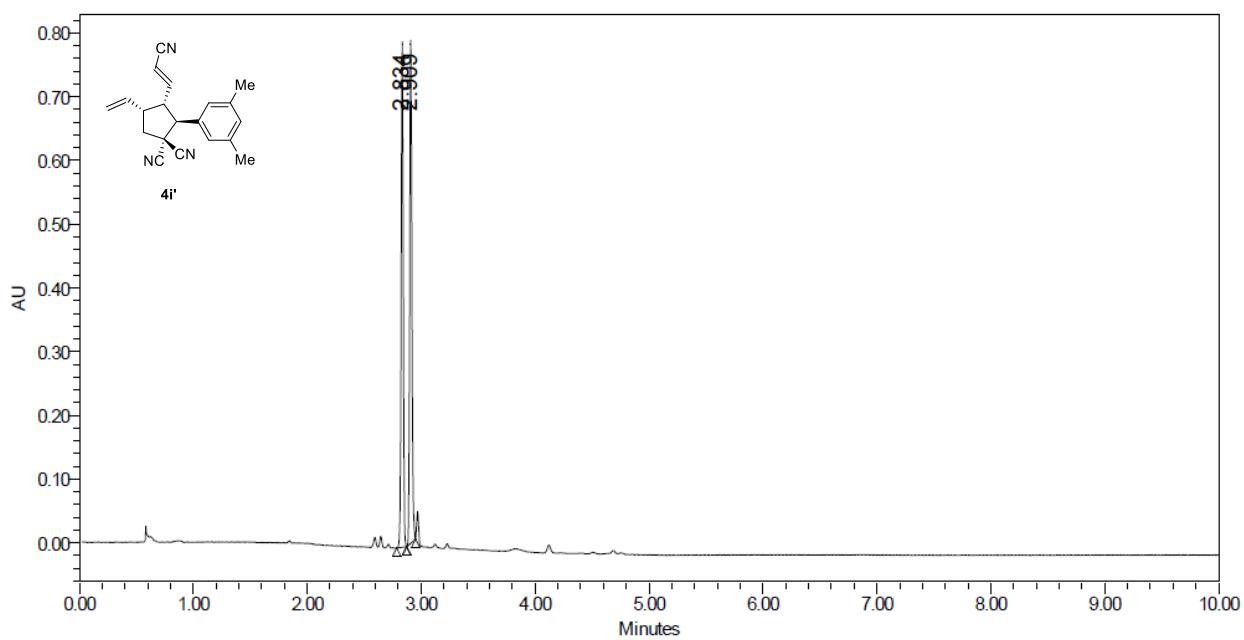

|   | Retention Time (min) | % Area |
|---|----------------------|--------|
| 1 | 2.834                | 48.78  |
| 2 | 2.909                | 51.22  |

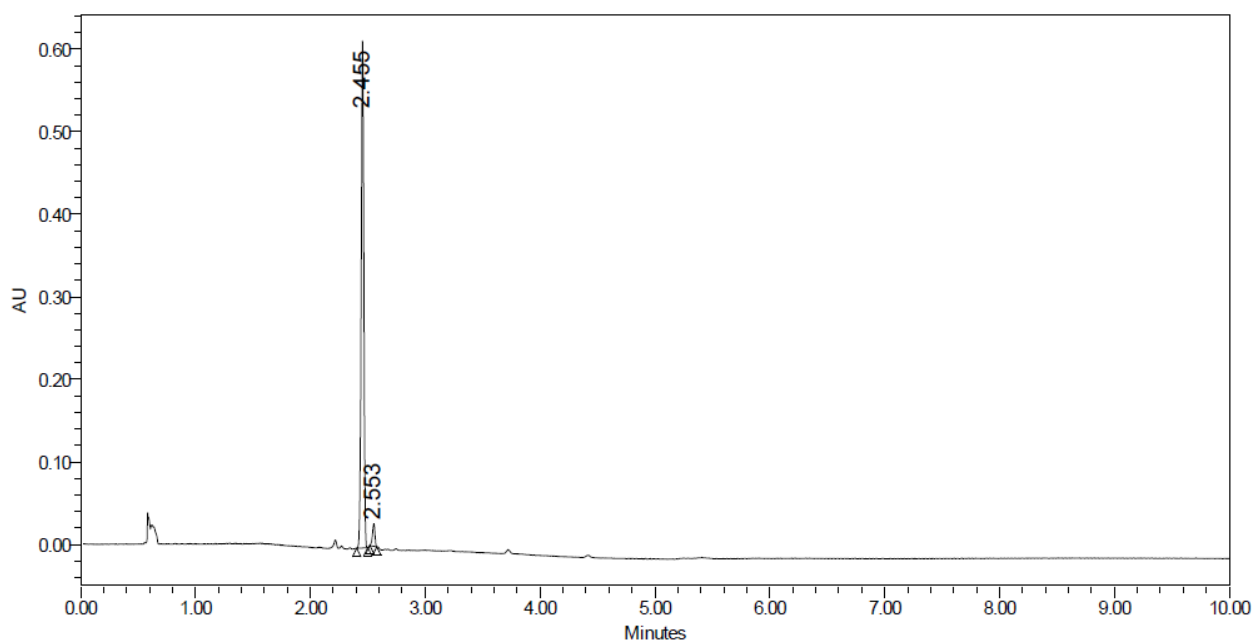

|   | Retention Time (min) | % Area |
|---|----------------------|--------|
| 1 | 2.455                | 95.95  |
| 2 | 2.553                | 4.05   |

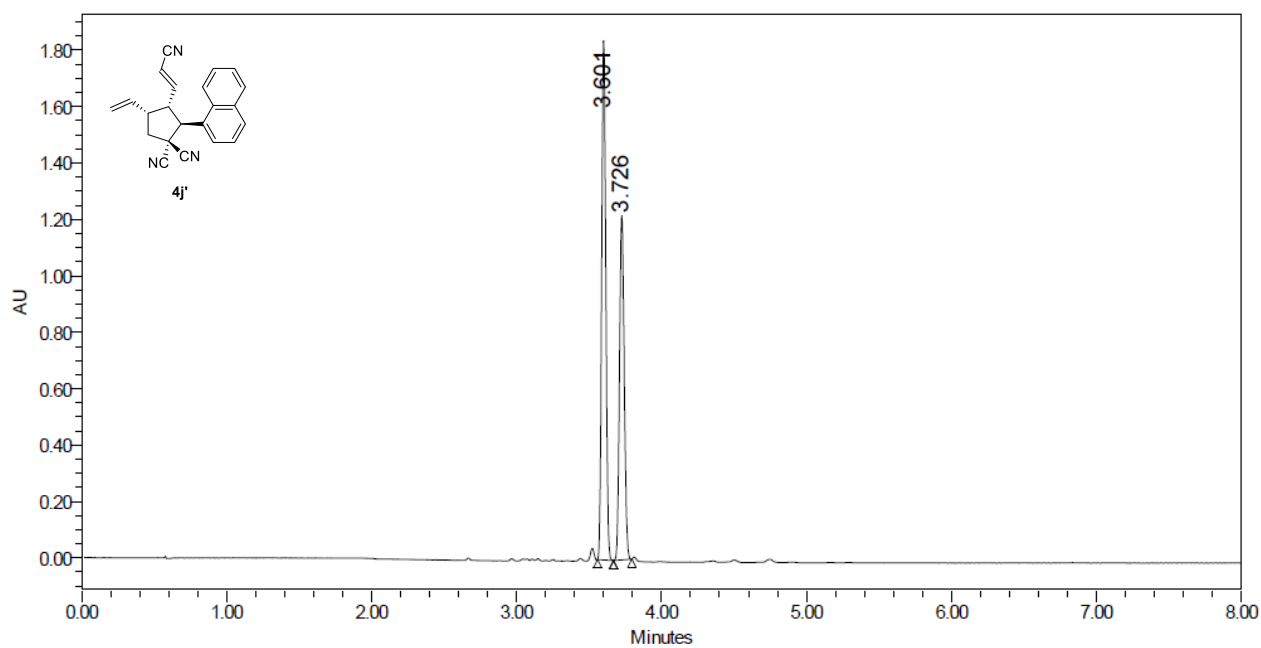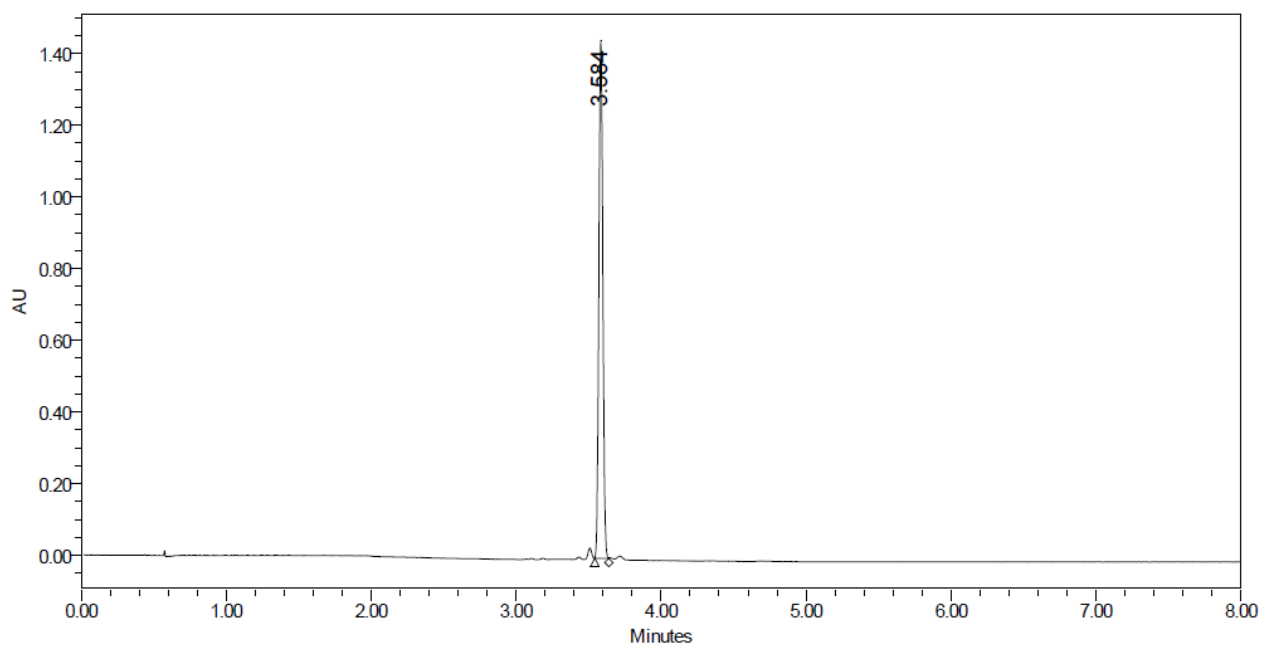

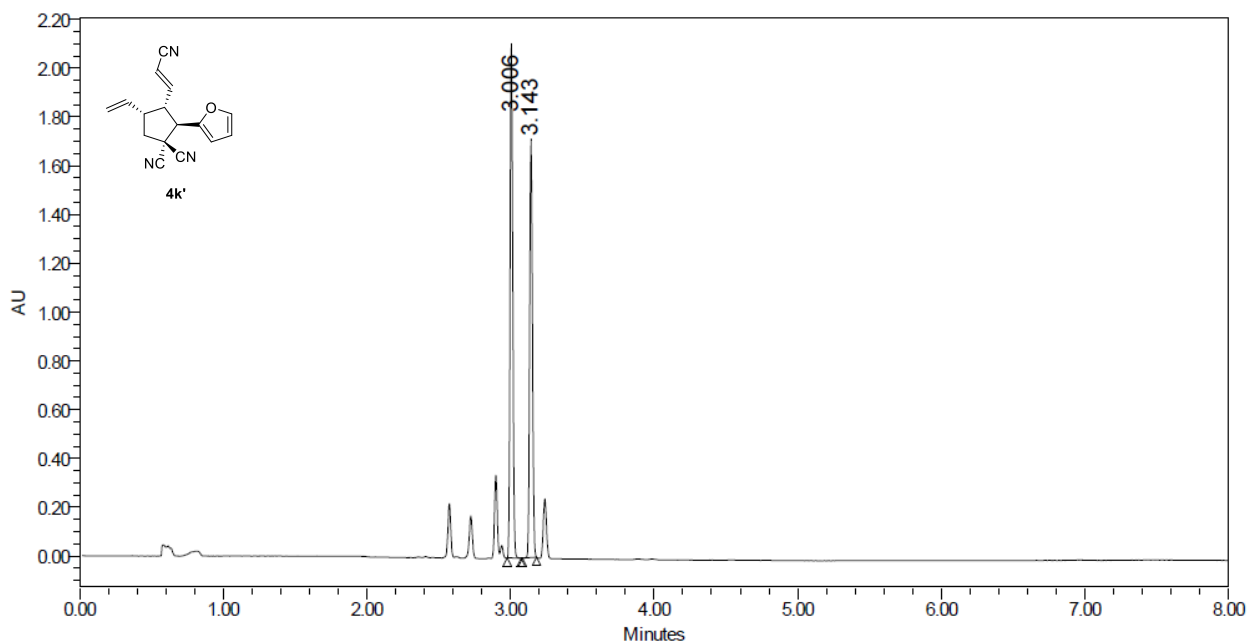

|   | Retention Time (min) | % Area |
|---|----------------------|--------|
| 1 | 3.006                | 53.89  |
| 2 | 3.143                | 46.11  |

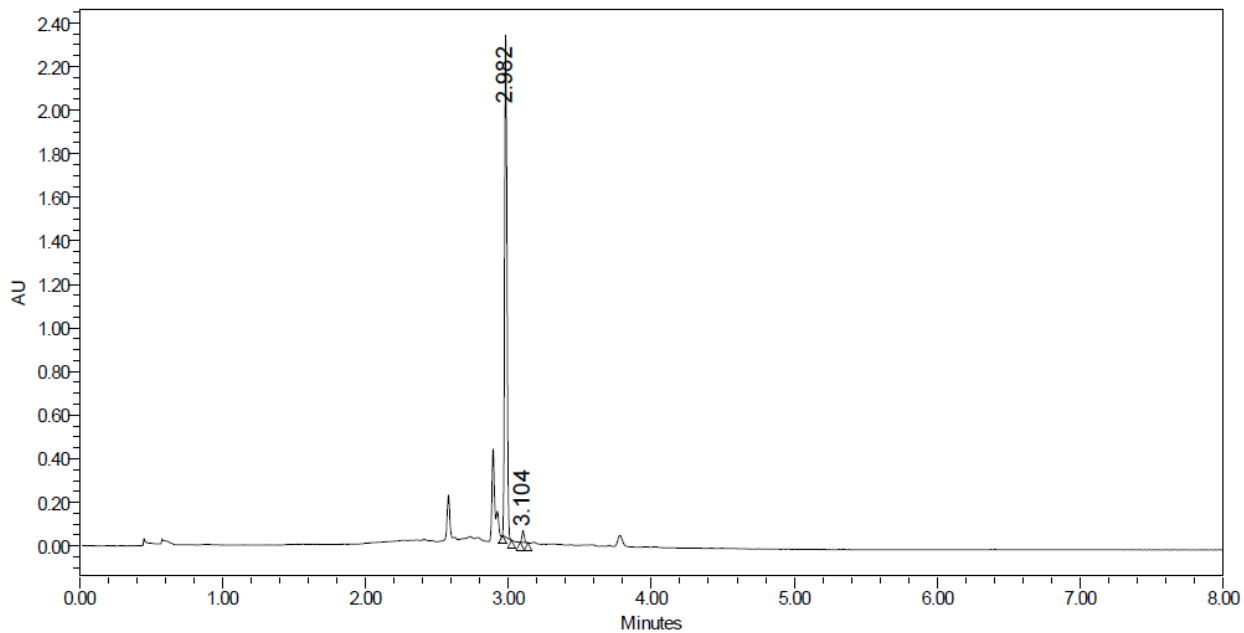

|   | Retention Time (min) | % Area |
|---|----------------------|--------|
| 1 | 2.982                | 97.87  |
| 2 | 3.104                | 2.13   |

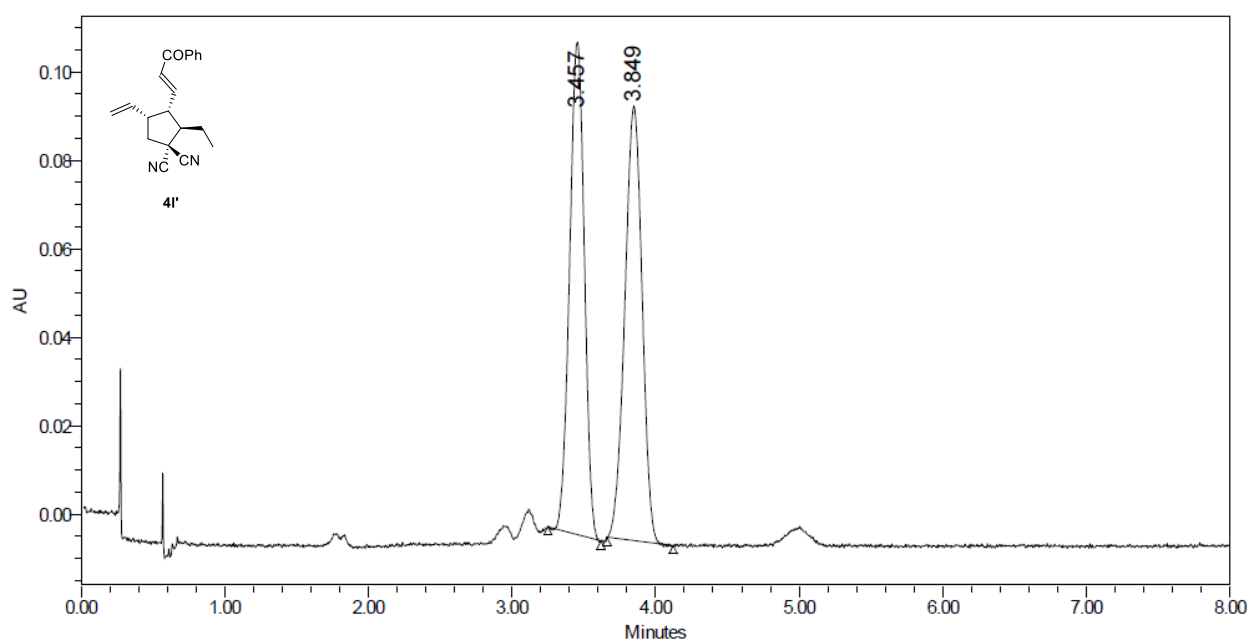

|   | Retention Time (min) | % Area |
|---|----------------------|--------|
| 1 | 3.457                | 49.12  |
| 2 | 3.849                | 50.88  |

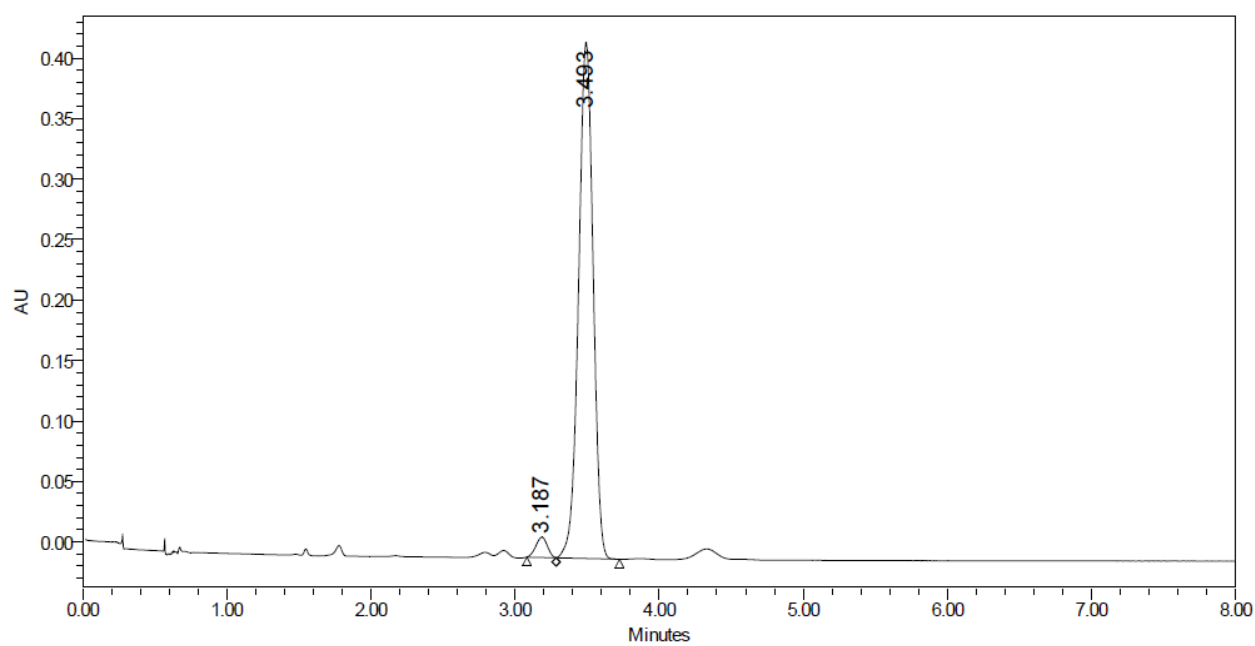

|   | Retention Time (min) | % Area |
|---|----------------------|--------|
| 1 | 3.187                | 3.00   |
| 2 | 3.493                | 97.00  |

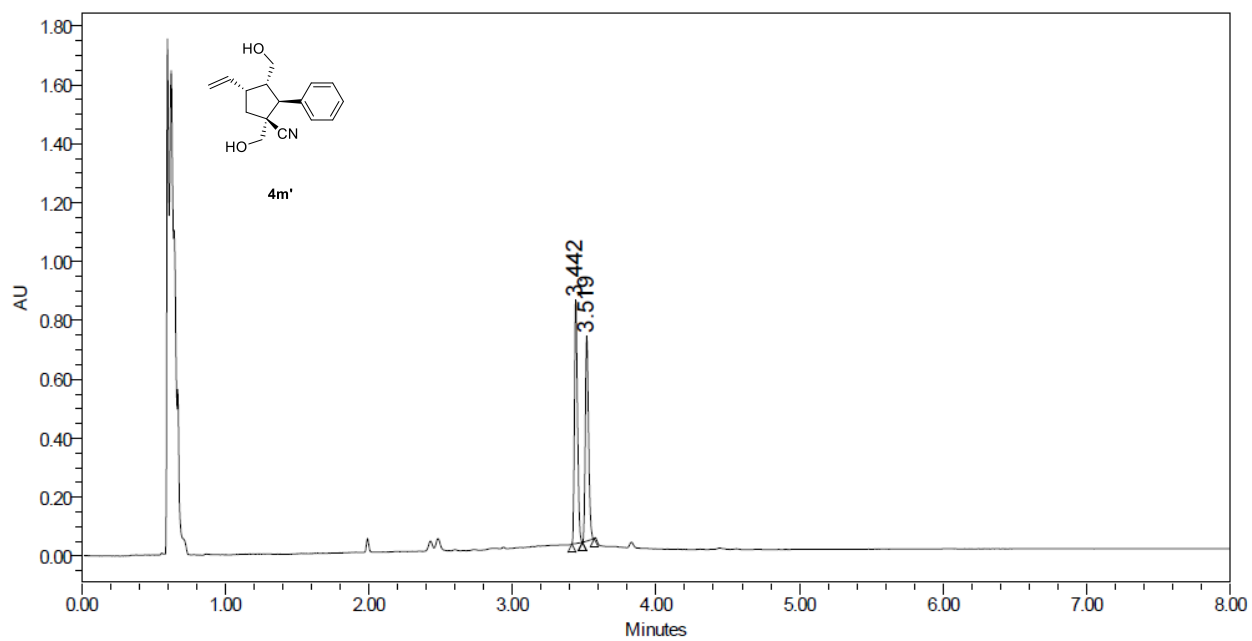

|   | Retention Time (min) | % Area |
|---|----------------------|--------|
| 1 | 3.442                | 52.77  |
| 2 | 3.519                | 47.23  |

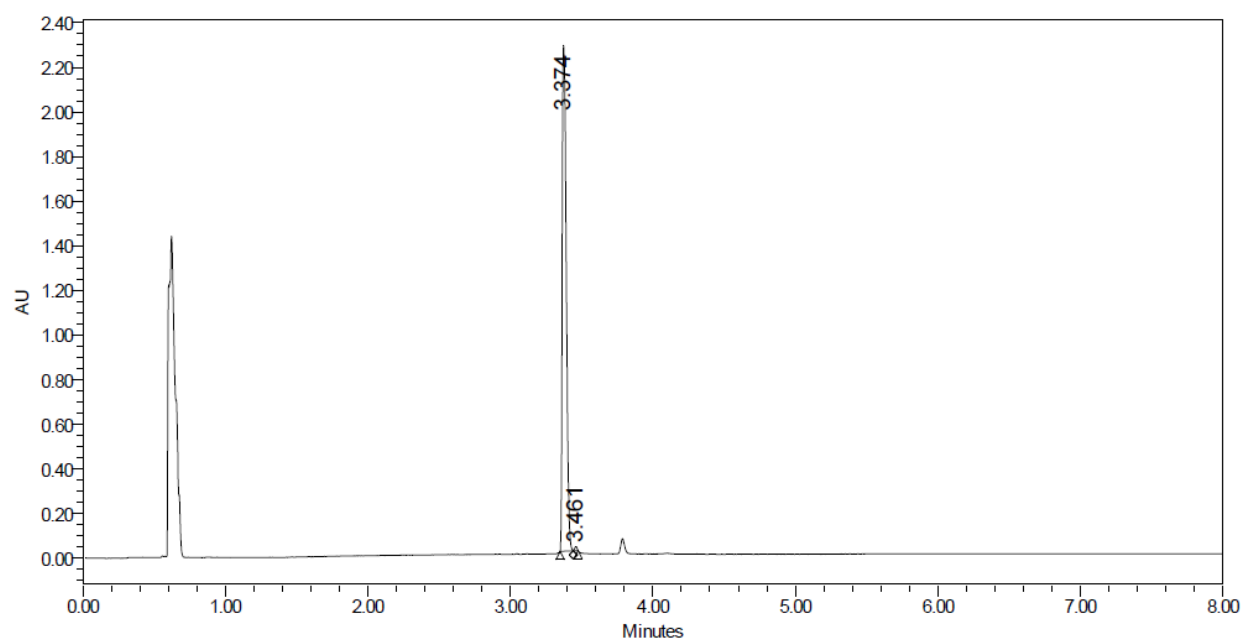

|   | Retention Time (min) | % Area |
|---|----------------------|--------|
| 1 | 3.374                | 99.51  |
| 2 | 3.461                | 0.49   |

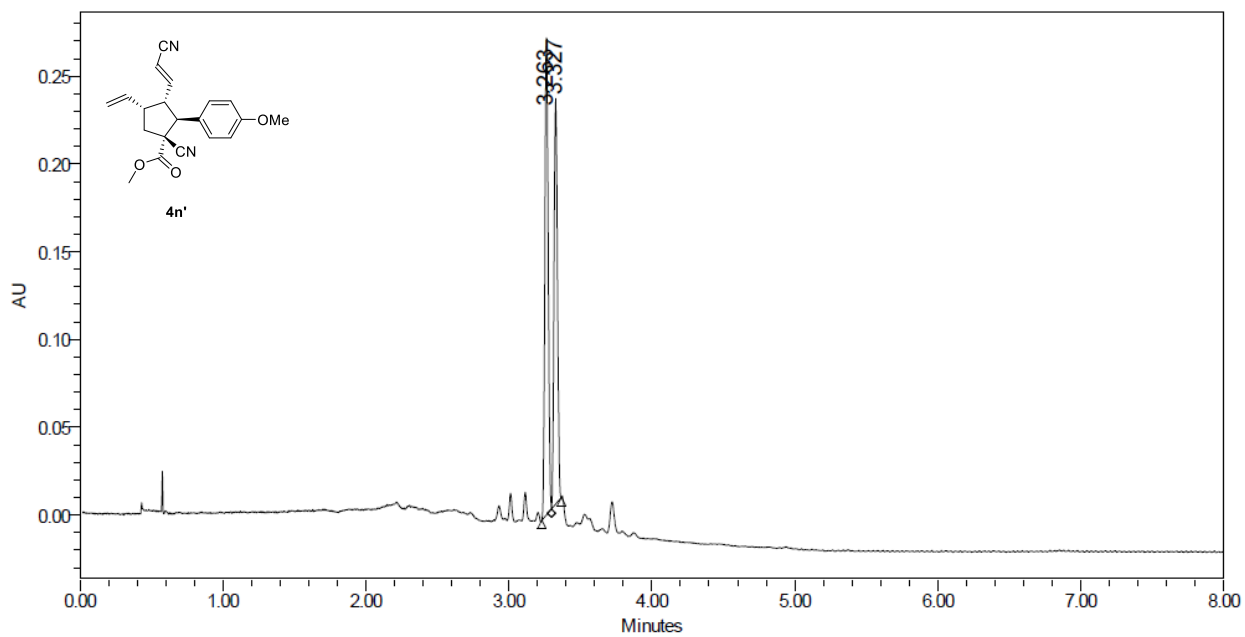

|   | Retention Time (min) | % Area |
|---|----------------------|--------|
| 1 | 3.263                | 53.29  |
| 2 | 3.327                | 46.71  |

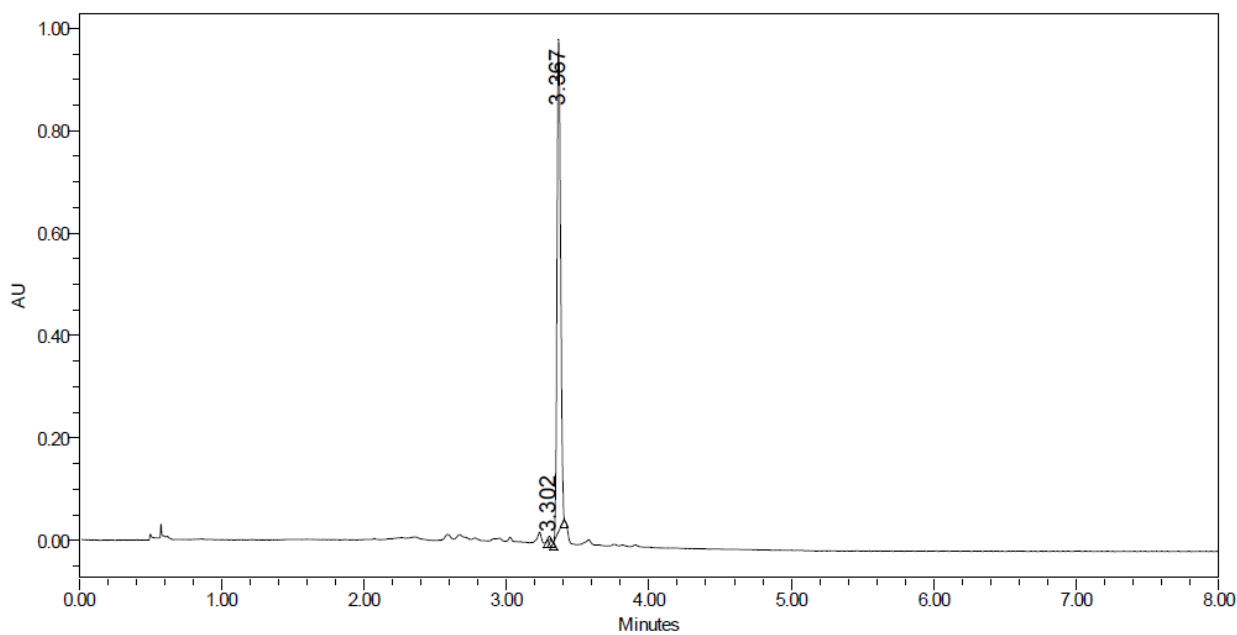

|   | Retention Time (min) | % Area |
|---|----------------------|--------|
| 1 | 3.302                | 0.40   |
| 2 | 3.367                | 99.60  |

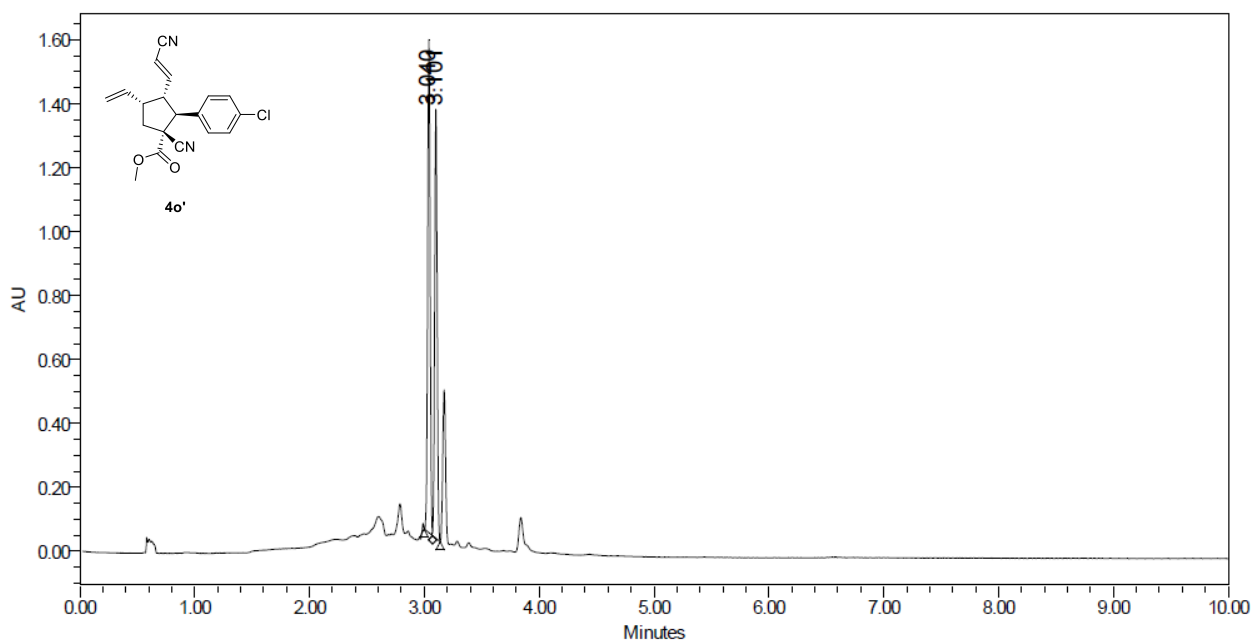

|   | Retention Time (min) | % Area |
|---|----------------------|--------|
| 1 | 3.040                | 53.14  |
| 2 | 3.101                | 46.86  |

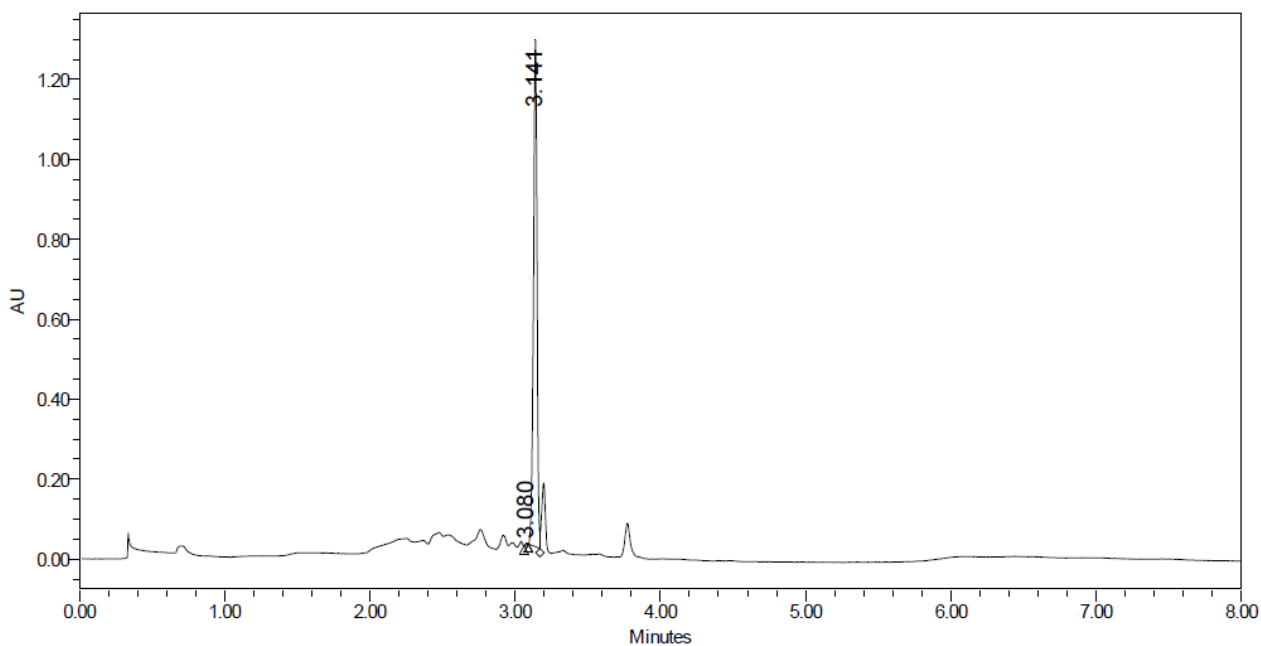

|   | Retention Time (min) | % Area |
|---|----------------------|--------|
| 1 | 3.080                | 0.17   |
| 2 | 3.141                | 99.83  |

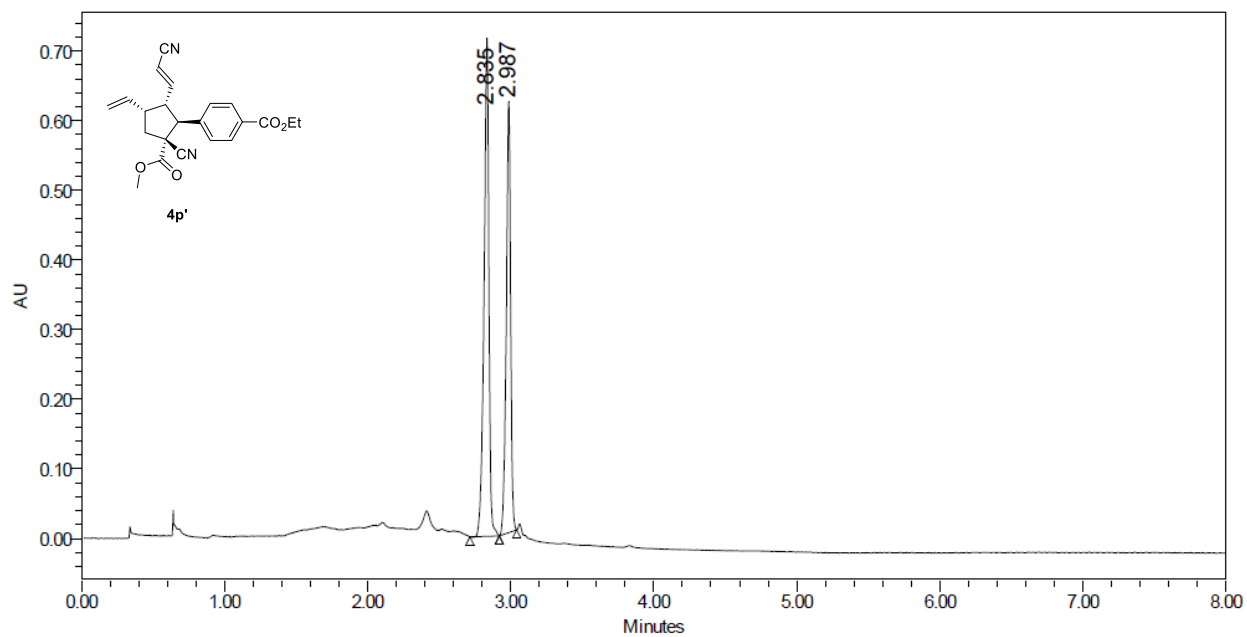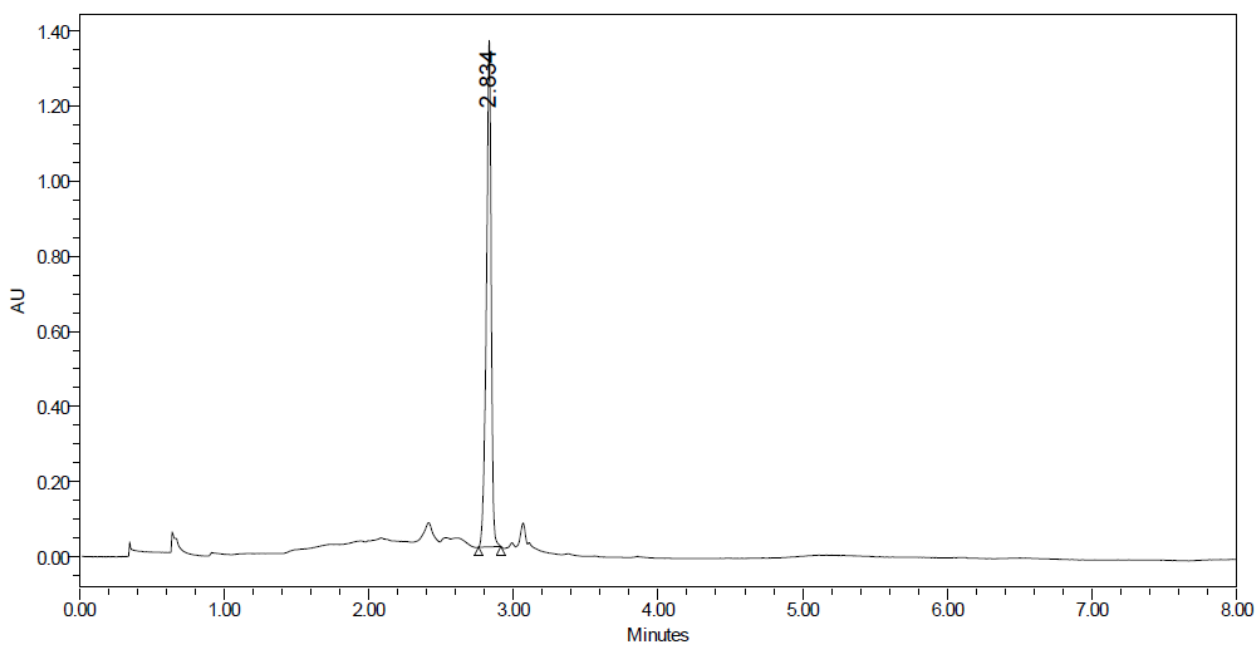

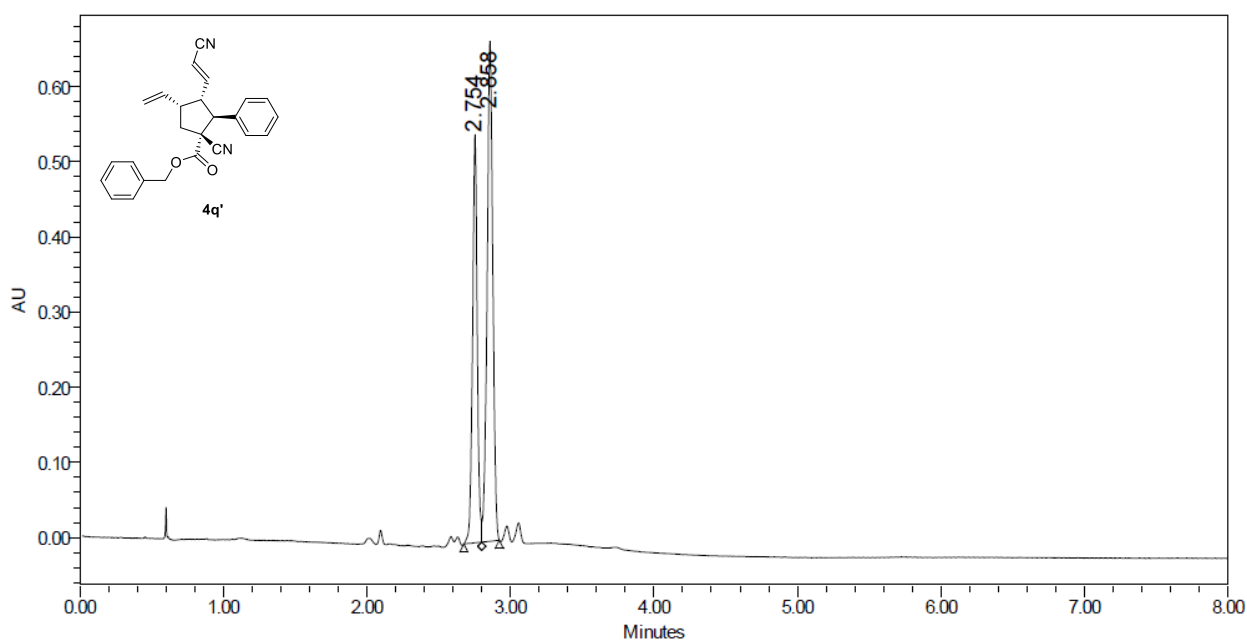

|   | Retention Time (min) | % Area |
|---|----------------------|--------|
| 1 | 2.754                | 40.17  |
| 2 | 2.858                | 59.83  |

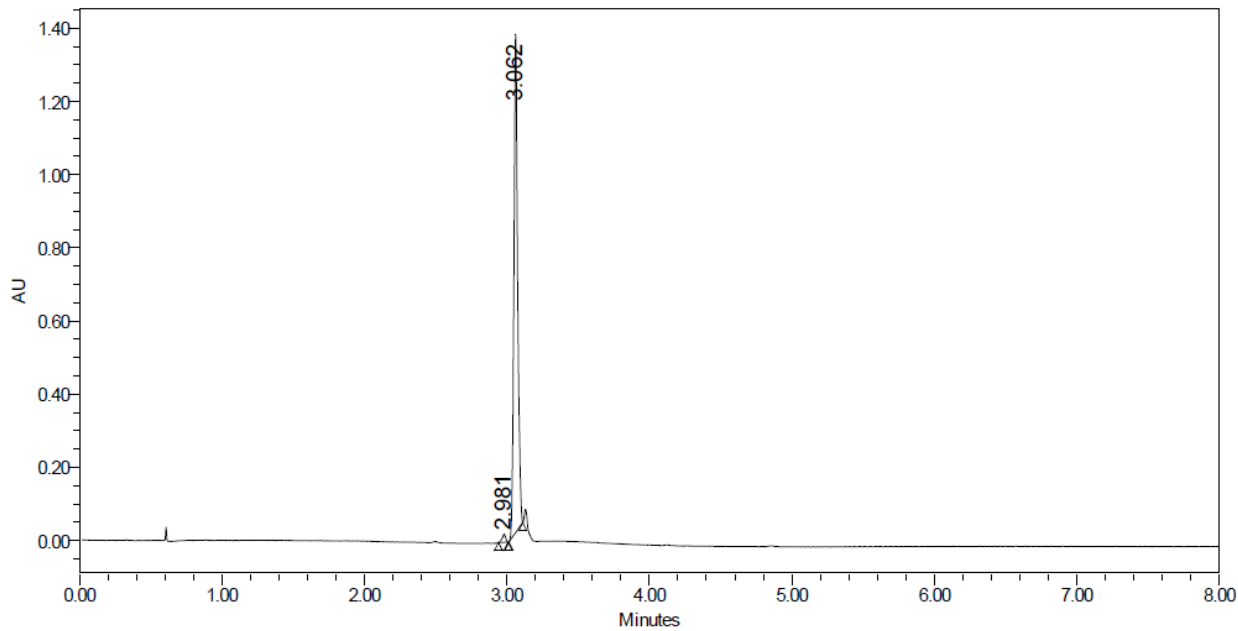

|   | Retention Time (min) | % Area |
|---|----------------------|--------|
| 1 | 2.981                | 1.46   |
| 2 | 3.062                | 98.54  |

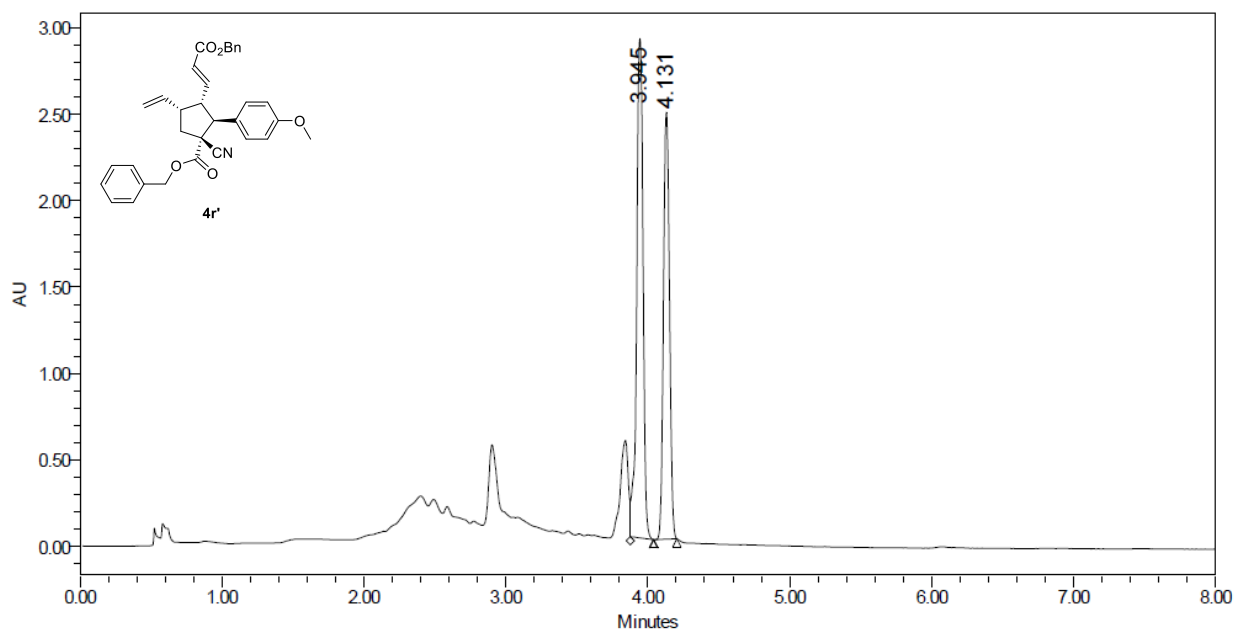

|   | Retention Time (min) | % Area |
|---|----------------------|--------|
| 1 | 3.945                | 55.28  |
| 2 | 4.131                | 44.72  |

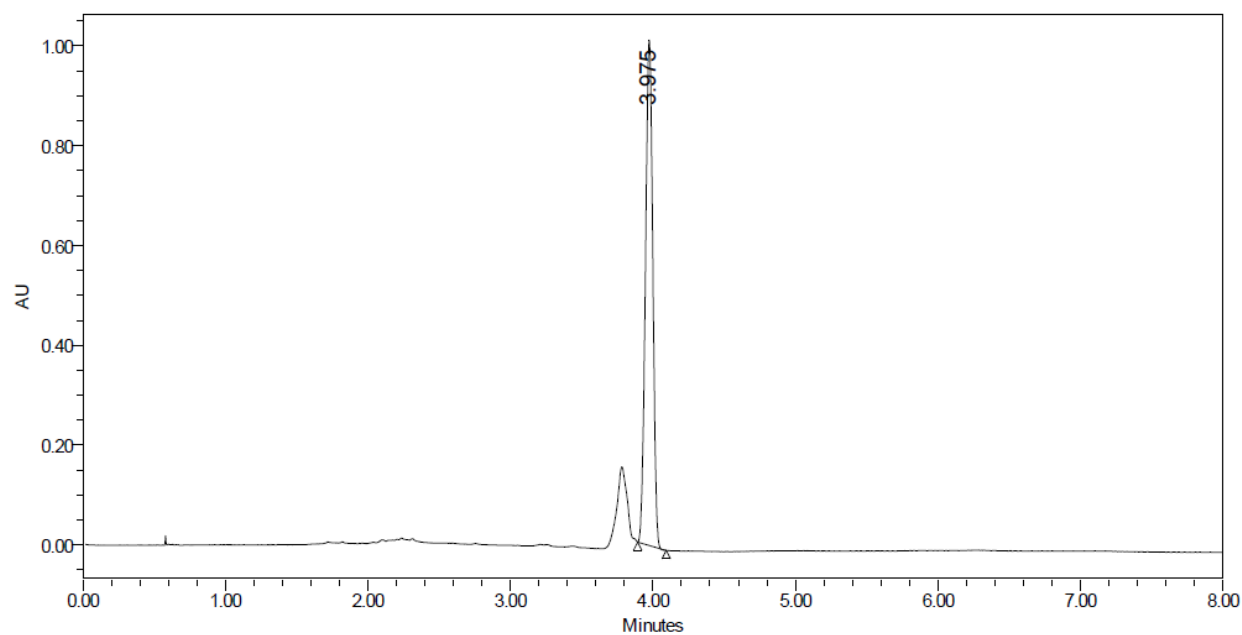

|   | Retention Time (min) | % Area |
|---|----------------------|--------|
| 1 | 3.975                | 100.00 |

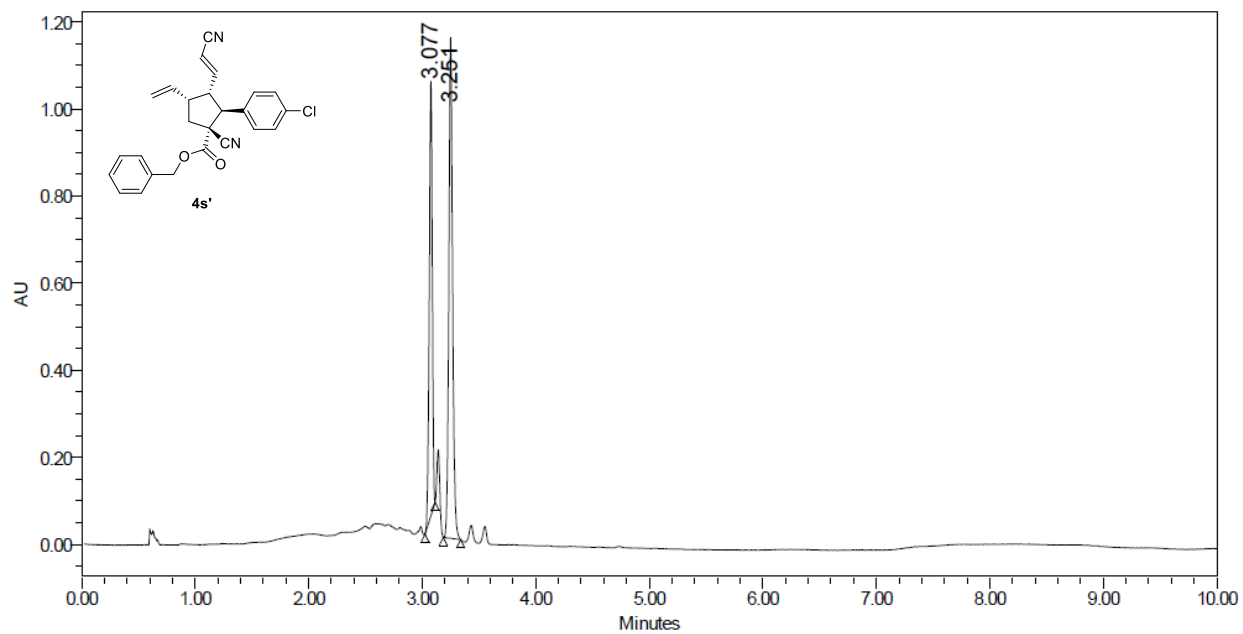

|   | Retention Time (min) | % Area |
|---|----------------------|--------|
| 1 | 3.077                | 41.20  |
| 2 | 3.251                | 58.80  |

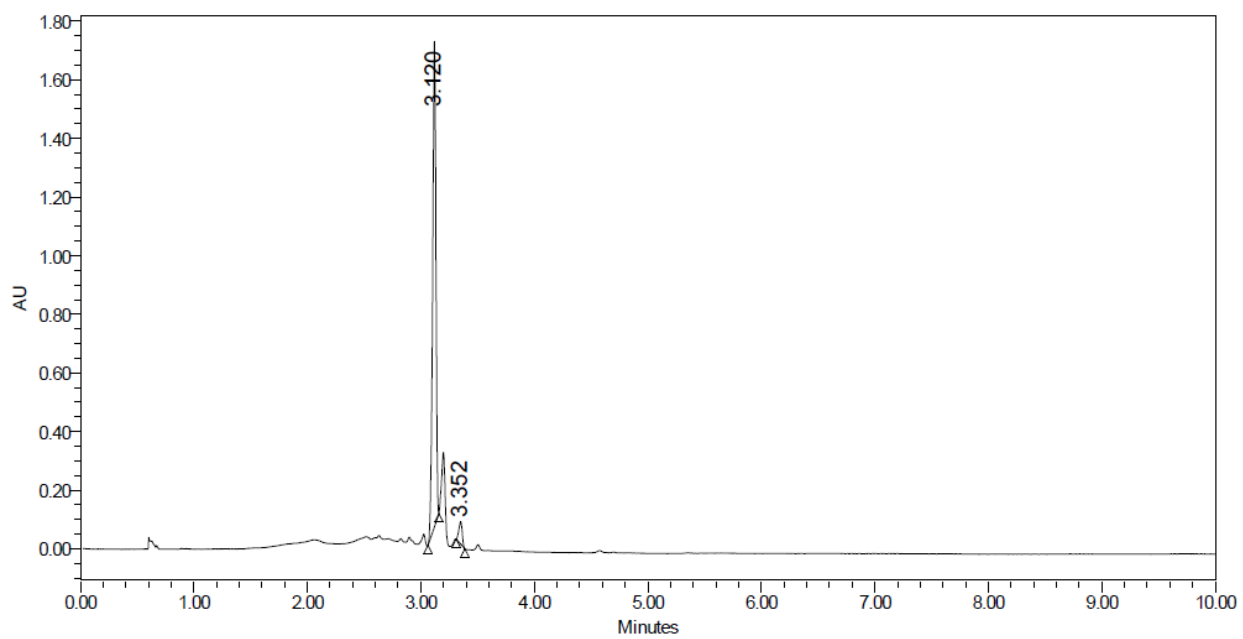

|   | Retention Time (min) | % Area |
|---|----------------------|--------|
| 1 | 3.120                | 95.61  |
| 2 | 3.352                | 4.39   |

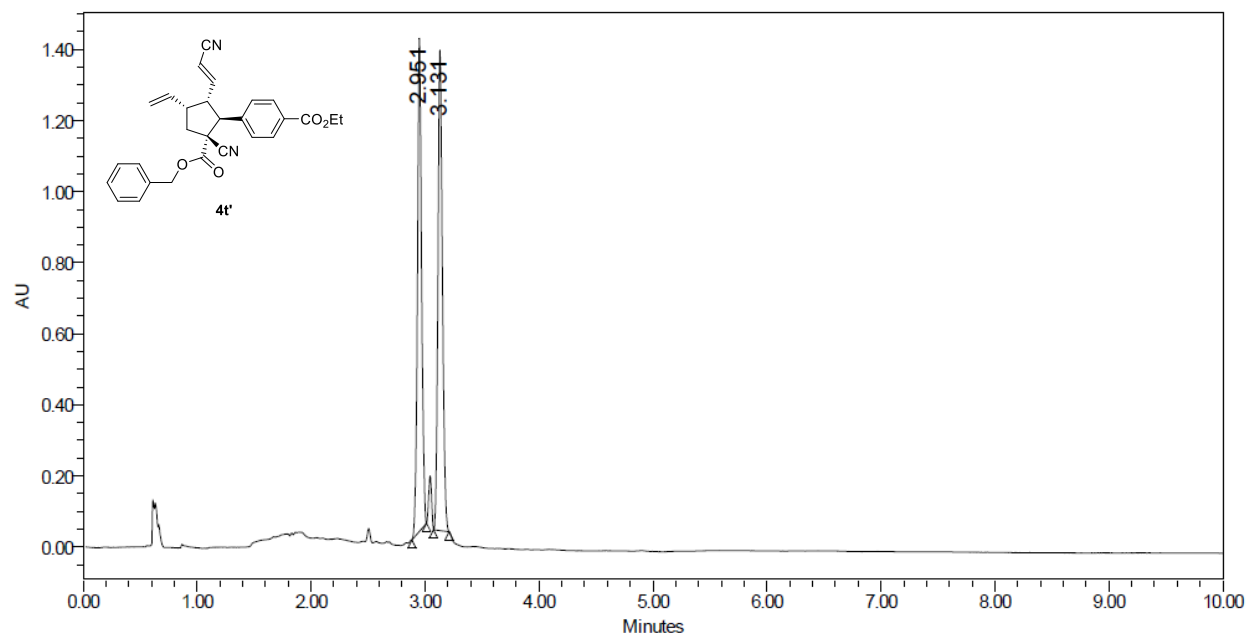

|   | Retention Time (min) | % Area |
|---|----------------------|--------|
| 1 | 2.951                | 48.54  |
| 2 | 3.131                | 51.46  |

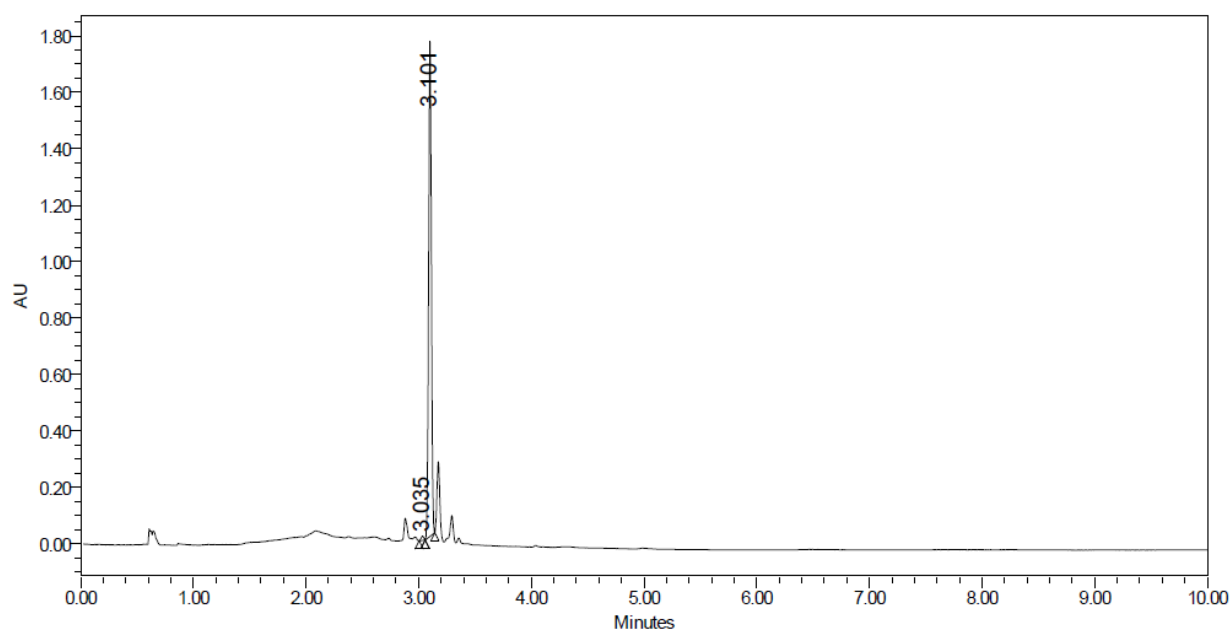

|   | Retention Time (min) | % Area |
|---|----------------------|--------|
| 1 | 3.035                | 0.81   |
| 2 | 3.101                | 99.19  |
